# Supplementary material for: General and selective syn-carboxylation-trifluoromethylation of terminal alkynes: application to the late-stage modification of dehydrocholic acid
Source: Royal Society of Chemistry journal article supplement (doi:10.1039/c9cc01173k), 2019-01-01

Electronic Supplementary Information

**General and selective *syn*-carboxylation-trifluoromethylation of  
terminal alkynes: Application to the late-stage modification of  
dehydrocholic acid**

Song-Lin Zhang\*, Chang Xiao, Hai-Xing Wan and Xiao-Ming Zhang\*

*Key Laboratory of Synthetic and Biological Colloids, Ministry of Education, School  
of Chemical and Material Engineering, Jiangnan University, Wuxi 214122, Jiangsu  
Province, China*

E-mail: slzhang@jiangnan.edu.cn

*Table of Contents*

|                                                                                                         |     |
|---------------------------------------------------------------------------------------------------------|-----|
| 1. General experimental details -----                                                                   | S2  |
| 2. General reaction procedure and characterization data for the products -----                          | S3  |
| 3. Stereochemistry determination of the products-----                                                   | S20 |
| 4. Late-stage functionalization of dehydrocholic acid -----                                             | S22 |
| 5. Alcolysis of product 4a-----                                                                         | S23 |
| 6. <sup>19</sup> F NMR monitoring of the reaction course -----                                          | S24 |
| 7. Mechanistic studies-----                                                                             | S25 |
| 8. Copies of <sup>1</sup> H, <sup>19</sup> F and <sup>13</sup> C NMR spectra for all the products ----- | S27 |

## 1. General experimental details

All chemicals were purchased commercially, except for Cu(III)-CF<sub>3</sub> complexes (py)Cu<sup>III</sup>(CF<sub>3</sub>)<sub>3</sub> and (phen) Cu<sup>III</sup>(CF<sub>3</sub>)<sub>3</sub> which were prepared according to our previous reports (please refer to: S.-L. Zhang and W.-F. Bie, *RSC Adv.* **2016**, 6, 70902; S.-L. Zhang, C. Xiao and H.-X. Wan, *Dalton Trans.* **2018**, 47, 4779). DMF, toluene, NMP and CH<sub>2</sub>Cl<sub>2</sub> solvents were simply dried over Na<sub>2</sub>SO<sub>4</sub> before use to extrude adventitious water. Other reactants were used as received without further purification. All of the reactions were performed in a sealed Schlenk tube under N<sub>2</sub> atmosphere which was realized through evacuation/backfill techniques after three times. NMR yields were determined using <sup>19</sup>F NMR analyses of the crude mixture with 4,4-difluorobiphenyl as the internal standard. Column chromatography on silica gel was used to obtain purified products that are suitable for NMR spectroscopic characterization. NMR spectra were recorded on a 400 MHz spectrometer and processed with MestReNova program. Chemical shifts are reported in ppm and referenced to residual solvent peaks. NMR signals are reported as follows to delineate possible splitting: s, singlet; br s, broad singlet; d, doublet; t, triplet; q, quartet; and m, multiplet. Coupling constants are reported in Hertz where present. All the <sup>13</sup>C and <sup>19</sup>F NMR spectra were obtained with complete proton decoupling. Elemental analyses were performed by the Analytic Laboratory of Jiangnan University. High resolution mass spectra (HRMS) were determined on Thermo Scientific LTQ Orbitrap XL with ESI ionization mode. FT-IR spectra were recorded on an IRTracer-100 spectrometer.

## 2. General reaction procedure and characterization data for the products

In an oven-dried 25-mL Schlenk tube equipped with a stir bar were added carboxylic acid (**3**, 0.4 mmol) and NaOtBu (0.4 mmol). The tube was then sealed, evacuated and refilled with dry nitrogen. Anhydrous DMF (2 mL) was then added via syringe. The contents in the tube were stirred vigorously at 100 °C for 45 min (seated in an oil bath). Then, a solution of (py)Cu<sup>III</sup>(CF<sub>3</sub>)<sub>3</sub> (**1**, 0.1 mmol) and alkynes (**2**, 0.1 mmol) in DMF (1 mL) was slowly injected into the tube by a syringe. The mixture was stirred for 12 hours until the reaction is complete (as monitored by TLC analysis of the crude mixture) and then cooled to room temperature. The crude mixture was extracted with excess dichloromethane. The combined organic layers were washed sequentially with large amounts of water (3 times) and with brine (once), and then dried over magnesium sulphate. After filtration, the solvent in the filtrate was removed by rotary evaporation in vacuum. The resulting residue is purified by column chromatography on silica gel to give the final products **4**.

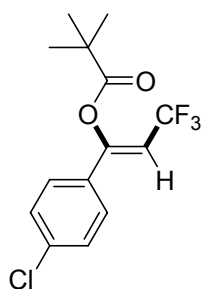

**(Z)-1-(4-chlorophenyl)-3,3,3-trifluoroprop-1-en-1-yl pivalate (4a**, 18 mg, 59%).

White solid; <sup>1</sup>H NMR (400 MHz, CDCl<sub>3</sub>) δ 7.47 – 7.35 (m, 4H), 5.93 (q, *J* = 7.5 Hz, 1H), 1.37 (s, 9H). <sup>19</sup>F NMR (376 MHz, CDCl<sub>3</sub>) δ -58.38 (s, 3F). <sup>13</sup>C NMR (101 MHz, CDCl<sub>3</sub>) δ 175.22 (s), 154.80 (q, *J* = 5.8 Hz), 136.86 (s), 131.74 (s), 129.23 (s), 126.85 (s), 122.24 (q, *J* = 269.9 Hz), 106.51 (q, *J* = 35.3 Hz), 39.21 (s), 26.95 (s). IR (KBr) 3101, 2991, 1751 (ν<sub>C=O</sub>), 1637 (ν<sub>C=C</sub>), 1489, 1332, 1269, 1097, 839, 796 cm<sup>-1</sup>. Anal. Calcd. for C<sub>14</sub>H<sub>14</sub>ClF<sub>3</sub>O<sub>2</sub>: C, 54.82; H, 4.60. Found: C, 54.98; H, 4.52. HRMS (ESI) *m/z* calcd for C<sub>14</sub>H<sub>15</sub>ClF<sub>3</sub>O<sub>2</sub><sup>+</sup> (M+H)<sup>+</sup> 307.0713, found 307.0710.

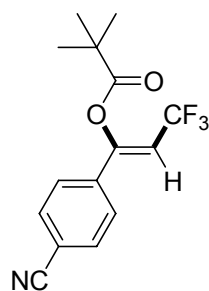

**(Z)-1-(4-cyanophenyl)-3,3,3-trifluoroprop-1-en-1-yl pivalate (4b)**, 20 mg, 67%).

White solid;  $^1\text{H}$  NMR (400 MHz,  $\text{CDCl}_3$ )  $\delta$  7.73 (d,  $J = 8.4$  Hz, 2H), 7.59 (d,  $J = 8.4$  Hz, 2H), 6.03 (q,  $J = 7.3$  Hz, 1H), 1.38 (s, 9H).  $^{19}\text{F}$  NMR (376 MHz,  $\text{CDCl}_3$ )  $\delta$  -58.66 (s, 3F).  $^{13}\text{C}$  NMR (101 MHz,  $\text{CDCl}_3$ )  $\delta$  175.17 (s), 153.98 (q,  $J = 5.7$  Hz), 137.54 (s), 132.70 (s), 126.16 (s), 121.88 (q,  $J = 270.3$  Hz), 117.87 (s), 114.32 (s), 108.82 (q,  $J = 35.6$  Hz), 39.23 (s), 26.90 (s). IR (KBr) 3093, 2980, 2232, 1759, 1673, 1481, 1336, 1266, 1133, 804, 663  $\text{cm}^{-1}$ . Anal. Calcd for  $\text{C}_{15}\text{H}_{14}\text{F}_3\text{NO}_2$ : C, 60.60; H, 4.75; N, 4.71. Found: C, 60.72; H, 4.82; N, 4.60.

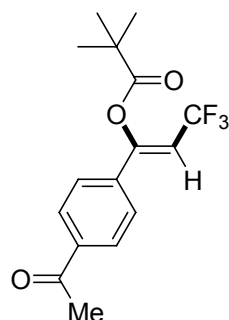

**(Z)-1-(4-acetylphenyl)-3,3,3-trifluoroprop-1-en-1-yl pivalate (4c)**, 17 mg, 54%).

White solid;  $^1\text{H}$  NMR (400 MHz,  $\text{CDCl}_3$ )  $\delta$  8.01 (d,  $J = 8.4$  Hz, 2H), 7.58 (d,  $J = 8.4$  Hz, 2H), 6.03 (q,  $J = 7.4$  Hz, 1H), 2.63 (s, 3H), 1.38 (s, 9H).  $^{19}\text{F}$  NMR (376 MHz,  $\text{CDCl}_3$ )  $\delta$  -58.49 (s, 3F).  $^{13}\text{C}$  NMR (101 MHz,  $\text{CDCl}_3$ )  $\delta$  197.02 (s), 175.25 (s), 154.77 (q,  $J = 5.8$  Hz), 138.51 (s), 137.38 (s), 128.85 (s), 125.77 (s), 122.12 (q,  $J = 270.1$  Hz), 107.88 (q,  $J = 35.4$  Hz), 39.22 (s), 26.94 (s), 26.67 (s). IR (KBr) 3081, 2995, 1755, 1680, 1606, 1481, 1336, 1266, 1125, 808, 659  $\text{cm}^{-1}$ . Anal. Calcd for  $\text{C}_{16}\text{H}_{17}\text{F}_3\text{O}_3$ : C, 61.14; H, 5.45. Found: C, 61.40; H, 5.62. Anal. Calcd for  $\text{C}_{16}\text{H}_{17}\text{F}_3\text{O}_3$ : C, 61.14; H, 5.45. Found: C, 61.01; H, 5.32.

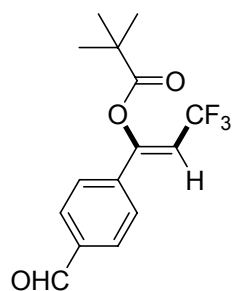

**(Z)-3,3,3-trifluoro-1-(4-formylphenyl)prop-1-en-1-yl pivalate (4d)**, 16 mg, 53%). Colorless oil;  $^1\text{H}$  NMR (400 MHz,  $\text{CDCl}_3$ )  $\delta$  10.07 (s, 1H), 7.95 (d,  $J = 8.4$  Hz, 2H), 7.65 (d,  $J = 8.3$  Hz, 2H), 6.06 (q,  $J = 7.4$  Hz, 1H), 1.39 (s, 9H).  $^{19}\text{F}$  NMR (376 MHz,  $\text{CDCl}_3$ )  $\delta$  -58.57 (s, 3F).  $^{13}\text{C}$  NMR (101 MHz,  $\text{CDCl}_3$ )  $\delta$  191.13 (s), 175.24 (s), 154.60 (q,  $J = 6.0$  Hz), 138.71 (s), 137.60 (s), 130.13 (s), 126.18 (s), 122.03 (d,  $J = 270.1$  Hz), 108.44 (q,  $J = 35.5$  Hz), 39.24 (s), 26.94 (s). IR (KBr) 3093, 2917, 1751, 1704, 1606, 1481, 1340, 1258, 1101, 804, 690  $\text{cm}^{-1}$ . Anal. Calcd for  $\text{C}_{15}\text{H}_{15}\text{F}_3\text{O}_3$ : C, 60.00; H, 5.04. Found: C, 60.11; H, 5.12.

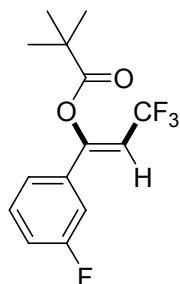

**(Z)-3,3,3-trifluoro-1-(3-fluorophenyl)prop-1-en-1-yl pivalate (4e)**, 13 mg, 45%). Colorless oil;  $^1\text{H}$  NMR (400 MHz,  $\text{CDCl}_3$ )  $\delta$  7.44 – 7.37 (m, 1H), 7.31 – 7.27 (m, 1H), 7.20 – 7.12 (m, 2H), 5.96 (q,  $J = 7.5$  Hz, 1H), 1.38 (s, 9H).  $^{19}\text{F}$  NMR (376 MHz,  $\text{CDCl}_3$ )  $\delta$  -58.49 (s, 3F), -111.58 (s, 1F).  $^{13}\text{C}$  NMR (101 MHz,  $\text{CDCl}_3$ )  $\delta$  175.23 (s), 162.87 (d,  $J = 247.6$  Hz), 154.51 (q,  $J = 5.8$  Hz), 135.43 (d,  $J = 7.7$  Hz), 130.64 (d,  $J = 8.3$  Hz), 122.17 (q,  $J = 270.0$  Hz), 121.27 (d,  $J = 2.9$  Hz), 117.67 (d,  $J = 21.3$  Hz), 112.70 (d,  $J = 23.6$  Hz), 107.11 (q,  $J = 35.4$  Hz), 39.21 (s), 26.94 (s). IR (KBr) 3093, 2984, 1763, 1673, 1590, 1481, 1226, 1089, 780, 686  $\text{cm}^{-1}$ . Anal. Calcd for  $\text{C}_{14}\text{H}_{14}\text{F}_4\text{O}_2$ : C, 57.93; H, 4.86. Found: C, 58.11; H, 4.95.

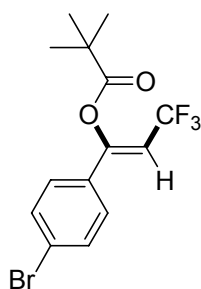

**(Z)-1-(4-bromophenyl)-3,3,3-trifluoroprop-1-en-1-yl pivalate (4f, 22 mg, 63%).**

White solid;  $^1\text{H}$  NMR (400 MHz,  $\text{CDCl}_3$ )  $\delta$  7.56 (d,  $J = 8.6$  Hz, 2H), 7.35 (d,  $J = 8.6$  Hz, 2H), 5.94 (q,  $J = 7.5$  Hz, 1H), 1.37 (s, 9H).  $^{19}\text{F}$  NMR (376 MHz,  $\text{CDCl}_3$ )  $\delta$  -58.41 (s, 3F).  $^{13}\text{C}$  NMR (101 MHz,  $\text{CDCl}_3$ )  $\delta$  175.22 (s), 154.89 (q,  $J = 5.8$  Hz), 132.20 (s), 127.05 (s), 125.16 (s), 122.23 (q,  $J = 270.0$  Hz), 106.57 (q,  $J = 35.4$  Hz), 39.20 (s), 26.95 (s). IR (KBr) 3101, 2987, 1751, 1673, 1485, 1332, 1097, 839, 702  $\text{cm}^{-1}$ . Anal. Calcd for  $\text{C}_{14}\text{H}_{14}\text{BrF}_3\text{O}_2$ : C, 47.88; H, 4.02. Found: C, 47.91; H, 4.15.

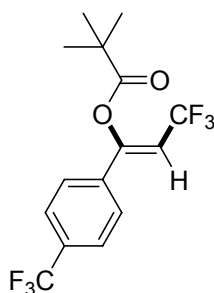

**(Z)-3,3,3-trifluoro-1-(4-(trifluoromethyl)phenyl)prop-1-en-1-yl pivalate (4g, 22 mg, 65%).** Colorless oil;  $^1\text{H}$  NMR (400 MHz,  $\text{CDCl}_3$ )  $\delta$  7.70 (d,  $J = 8.3$  Hz, 2H), 7.61 (d,  $J = 8.3$  Hz, 2H), 6.01 (q,  $J = 7.4$  Hz, 1H), 1.38 (s, 9H).  $^{19}\text{F}$  NMR (376 MHz,  $\text{CDCl}_3$ )  $\delta$  -58.60 (s, 3F), -63.02 (s, 3F).  $^{13}\text{C}$  NMR (101 MHz,  $\text{CDCl}_3$ )  $\delta$  175.23 (s), 154.49 (q,  $J = 5.8$  Hz), 136.73 (s), 132.48 (q,  $J = 32.9$  Hz), 125.98 (q,  $J = 3.7$  Hz), 125.95 (s), 123.60 (q,  $J = 272.4$  Hz), 122.04 (q,  $J = 270.1$  Hz), 108.04 (q,  $J = 35.5$  Hz), 39.22 (s), 26.91 (s). IR (KBr) 3117, 2987, 1759, 1676, 1414, 1320, 1133, 800, 698  $\text{cm}^{-1}$ . Anal. Calcd for  $\text{C}_{15}\text{H}_{14}\text{F}_6\text{O}_2$ : C, 52.95; H, 4.15. Found: C, 53.12; H, 4.26.

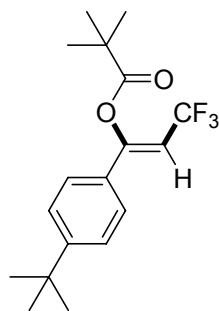

**(Z)-1-(4-(tert-butyl)phenyl)-3,3,3-trifluoroprop-1-en-1-yl pivalate (4h)**, 20 mg, 61%). Colorless oil;  $^1\text{H}$  NMR (400 MHz,  $\text{CDCl}_3$ )  $\delta$  7.47 – 7.40 (m, 4H), 5.93 (q,  $J$  = 7.6 Hz, 1H), 1.39 (s, 9H), 1.34 (s, 9H).  $^{19}\text{F}$  NMR (376 MHz,  $\text{CDCl}_3$ )  $\delta$  -58.07 (s, 3F).  $^{13}\text{C}$  NMR (101 MHz,  $\text{CDCl}_3$ )  $\delta$  175.36 (s), 155.77 (q,  $J$  = 5.9 Hz), 154.16 (s), 130.11 (s), 125.89 (s), 125.25 (s), 122.58 (q,  $J$  = 269.7 Hz), 105.12 (q,  $J$  = 35.1 Hz), 39.21 (s), 34.85 (s), 31.13 (s), 27.03 (s). IR (KBr) 3097, 2972, 1763, 1673, 1481, 1332, 1273, 1093, 804, 655  $\text{cm}^{-1}$ . Anal. Calcd for  $\text{C}_{18}\text{H}_{23}\text{F}_3\text{O}_2$ : C, 65.84; H, 7.06. Found: C, 66.03; H, 7.21.

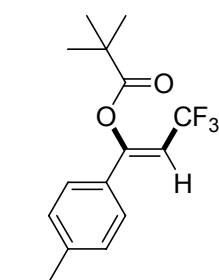

**(Z)-1-(4-ethylphenyl)-3,3,3-trifluoroprop-1-en-1-yl pivalate (4i)**, 16 mg, 53%). White solid;  $^1\text{H}$  NMR (400 MHz,  $\text{CDCl}_3$ )  $\delta$  7.41 (d,  $J$  = 8.2 Hz, 2H), 7.25 (d,  $J$  = 8.2 Hz, 2H), 5.91 (q,  $J$  = 7.6 Hz, 1H), 2.69 (q,  $J$  = 7.6 Hz, 2H), 1.38 (s, 9H), 1.26 (t,  $J$  = 7.7 Hz, 3H).  $^{19}\text{F}$  NMR (376 MHz,  $\text{CDCl}_3$ )  $\delta$  -58.09 (s, 3F).  $^{13}\text{C}$  NMR (101 MHz,  $\text{CDCl}_3$ )  $\delta$  175.33 (s), 155.87 (q,  $J$  = 5.9 Hz), 147.30 (s), 130.48 (s), 128.43 (s), 125.51 (s), 122.56 (q,  $J$  = 269.7 Hz), 105.10 (q,  $J$  = 35.0 Hz), 39.20 (s), 28.69 (s), 27.02 (s), 15.20 (s). IR (KBr) 3093, 2972, 1763, 1673, 1481, 1269, 1097, 839, 667  $\text{cm}^{-1}$ . Anal. Calcd for  $\text{C}_{16}\text{H}_{19}\text{F}_3\text{O}_2$ : C, 63.99; H, 6.38. Found: C, 64.11; H, 6.57. HRMS (ESI)  $m/z$  calcd for  $\text{C}_{16}\text{H}_{20}\text{F}_3\text{O}_2^+$  ( $\text{M}+\text{H}$ ) $^+$  301.1415, found 301.1412.

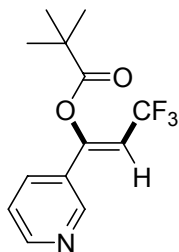

**(Z)-3,3,3-trifluoro-1-(pyridin-3-yl)prop-1-en-1-yl pivalate (4j)**, 14 mg, 51%). Yellow oil;  $^1\text{H}$  NMR (400 MHz,  $\text{CDCl}_3$ )  $\delta$  8.85 (br s, 2H), 7.79 (d,  $J = 7.9$  Hz, 1H), 7.44 (br s, 1H), 6.00 (q,  $J = 7.4$  Hz, 1H), 1.37 (s, 9H).  $^{19}\text{F}$  NMR (376 MHz,  $\text{CDCl}_3$ )  $\delta$  -58.54 (s, 3F).  $^{13}\text{C}$  NMR (101 MHz,  $\text{CDCl}_3$ )  $\delta$  175.21 (s), 153.47 (s), 151.11 (q,  $J = 4.2$  Hz), 146.57 (s), 133.01 (s), 130.58 (s), 128.89 (s), 121.97 (q,  $J = 270.1$  Hz), 107.88 (q,  $J = 35.5$  Hz), 39.25 (s), 26.92 (s). IR (KBr) 3085, 2980, 1763, 1680, 1590, 1481, 1273, 1093, 792, 702, 636  $\text{cm}^{-1}$ . Anal. Calcd for  $\text{C}_{13}\text{H}_{14}\text{F}_3\text{NO}_2$ : C, 57.14; H, 5.16; N, 5.13. Found: C, 57.28; H, 5.25; N, 4.99. HRMS (ESI)  $m/z$  calcd for  $\text{C}_{13}\text{H}_{15}\text{F}_3\text{NO}_2^+$  ( $\text{M}+\text{H}$ ) $^+$  274.1055, found 274.1049.

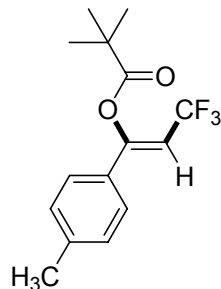

**(Z)-3,3,3-trifluoro-1-(p-tolyl)prop-1-en-1-yl pivalate (4m)**, 18 mg, 63%). White solid;  $^1\text{H}$  NMR (400 MHz,  $\text{CDCl}_3$ )  $\delta$  7.38 (d,  $J = 8.2$  Hz, 2H), 7.23 (d,  $J = 8.1$  Hz, 2H), 5.91 (q,  $J = 7.6$  Hz, 1H), 2.40 (s, 3H), 1.38 (s, 9H).  $^{19}\text{F}$  NMR (376 MHz,  $\text{CDCl}_3$ )  $\delta$  -58.10 (s, 3F).  $^{13}\text{C}$  NMR (101 MHz,  $\text{CDCl}_3$ )  $\delta$  175.28 (s), 155.86 (q,  $J = 5.9$  Hz), 141.05 (s), 130.32 (s), 129.60 (s), 125.42 (s), 122.55 (q,  $J = 269.6$  Hz), 105.06 (q,  $J = 35.1$  Hz), 39.19 (s), 27.00 (s), 21.34 (s). IR (KBr) 3097, 2990, 1763, 1669, 1481, 1332, 1273, 1125, 1019, 796, 671  $\text{cm}^{-1}$ . Anal. Calcd for  $\text{C}_{15}\text{H}_{17}\text{F}_3\text{O}_2$ : C, 62.93; H, 5.99. Found: C, 63.04; H, 6.08.



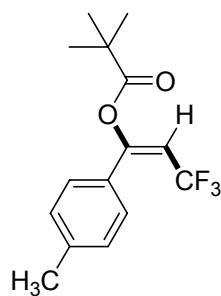

**(E)-3,3,3-trifluoro-1-(p-tolyl)prop-1-en-1-yl pivalate (4m')**, 6 mg, 14%). Colorless oil;  $^1\text{H}$  NMR (400 MHz,  $\text{CDCl}_3$ )  $\delta$  7.38 (d,  $J = 8.1$  Hz, 2H), 7.21 (d,  $J = 8.0$  Hz, 2H), 5.70 (q,  $J = 8.0$  Hz, 1H), 2.40 (s, 3H), 1.27 (s, 9H).  $^{19}\text{F}$  NMR (376 MHz,  $\text{CDCl}_3$ )  $\delta$  -55.56 (s, 3F).  $^{13}\text{C}$  NMR (101 MHz,  $\text{CDCl}_3$ )  $\delta$  175.70 (s), 157.36 (q,  $J = 6.3$  Hz), 140.55 (s), 129.70 (s), 128.89 (s), 128.11 (q,  $J = 1.6$  Hz, through-space C-F coupling), 122.68 (d,  $J = 268.8$  Hz), 108.64 (q,  $J = 35.9$  Hz), 39.01 (s), 26.85 (s), 21.44 (s). IR (KBr) 3097, 2968, 1759, 1680, 1481, 1367, 1207, 1097, 823, 800  $\text{cm}^{-1}$ . Anal. Calcd for  $\text{C}_{15}\text{H}_{17}\text{F}_3\text{O}_2$ : C, 62.93; H, 5.99. Found: C, 63.11; H, 6.12.

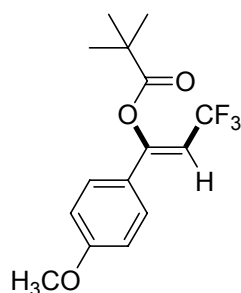

**(Z)-3,3,3-trifluoro-1-(4-methoxyphenyl)prop-1-en-1-yl pivalate (4n)**, 15 mg, 50%). Colorless oil;  $^1\text{H}$  NMR (400 MHz,  $\text{CDCl}_3$ )  $\delta$  7.43 (d,  $J = 8.8$  Hz, 2H), 6.93 (d,  $J = 8.8$  Hz, 2H), 5.85 (q,  $J = 7.6$  Hz, 1H), 3.85 (s, 3H), 1.38 (s, 9H).  $^{19}\text{F}$  NMR (376 MHz,  $\text{CDCl}_3$ )  $\delta$  -57.91 (s, 3F).  $^{13}\text{C}$  NMR (101 MHz,  $\text{CDCl}_3$ )  $\delta$  175.33 (s), 161.55 (s), 155.54 (q,  $J = 5.9$  Hz), 127.08 (s), 125.46 (s), 122.65 (q,  $J = 269.6$  Hz), 114.33 (s), 104.05 (q,  $J = 35.0$  Hz), 55.40 (s), 39.22 (s), 27.03 (s). IR (KBr) 3093, 2968, 2921, 1759, 1669, 1516, 1461, 1250, 1097, 835, 671, 542  $\text{cm}^{-1}$ . Anal. Calcd for  $\text{C}_{15}\text{H}_{17}\text{F}_3\text{O}_3$ : C, 59.60; H, 5.67. Found: C, 59.71; H, 5.58.

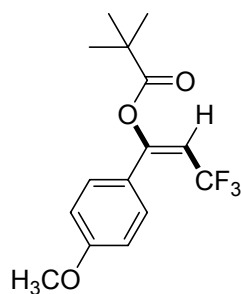

**(E)-3,3,3-trifluoro-1-(4-methoxyphenyl)prop-1-en-1-yl pivalate (4n'**, 4 mg, 13%).

Colorless oil;  $^1\text{H}$  NMR (400 MHz,  $\text{CDCl}_3$ )  $\delta$  7.43 (d,  $J = 8.7$  Hz, 2H), 6.92 (d,  $J = 8.8$  Hz, 2H), 5.66 (q,  $J = 8.0$  Hz, 1H), 3.85 (s, 3H), 1.27 (s, 9H).  $^{19}\text{F}$  NMR (376 MHz,  $\text{CDCl}_3$ )  $\delta$  -55.56 (s, 3F).  $^{13}\text{C}$  NMR (101 MHz,  $\text{CDCl}_3$ )  $\delta$  175.77 (s), 161.10 (s), 157.07 (q,  $J = 6.6$  Hz), 129.78 (q,  $J = 1.9$  Hz, through-space C-F coupling), 124.87 (s), 122.78 (q,  $J = 268.8$  Hz), 113.64 (s), 108.12 (q,  $J = 35.9$  Hz), 55.28 (s), 39.03 (s), 26.87 (s). IR (KBr) 3085, 2964, 1759, 1676, 1610, 1512, 1367, 1101, 839, 714  $\text{cm}^{-1}$ . Anal. Calcd for  $\text{C}_{15}\text{H}_{17}\text{F}_3\text{O}_3$ : C, 59.60; H, 5.67. Found: C, 59.78; H, 5.77.

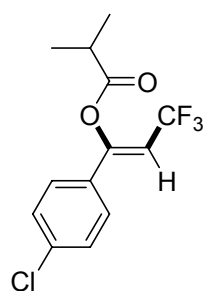

**(Z)-1-(4-chlorophenyl)-3,3,3-trifluoroprop-1-en-1-yl isobutyrate (4o**, 15 mg, 51%).

Yellow oil;  $^1\text{H}$  NMR (400 MHz,  $\text{CDCl}_3$ )  $\delta$  7.46 – 7.37 (m, 4H), 5.94 (q,  $J = 7.5$  Hz, 1H), 2.85 (septet,  $J = 7.0$  Hz, 1H), 1.33 (d,  $J = 7.0$  Hz, 6H).  $^{19}\text{F}$  NMR (376 MHz,  $\text{CDCl}_3$ )  $\delta$  -58.51 (s, 3F).  $^{13}\text{C}$  NMR (101 MHz,  $\text{CDCl}_3$ )  $\delta$  173.74 (s), 154.46 (q,  $J = 5.8$  Hz), 136.91 (s), 131.57 (s), 129.23 (s), 126.90 (s), 122.24 (q,  $J = 269.9$  Hz), 106.43 (q,  $J = 35.3$  Hz), 34.06 (s), 18.64 (s). IR (KBr) 3105, 2984, 1759, 1673, 1489, 1273, 1133, 835, 796  $\text{cm}^{-1}$ . Anal. Calcd for  $\text{C}_{13}\text{H}_{12}\text{ClF}_3\text{O}_2$ : C, 53.35; H, 4.13. Found: C, 53.24; H, 4.25.

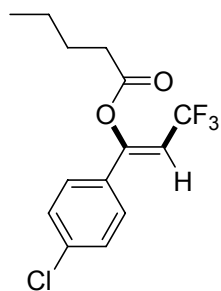

**(Z)-1-(4-chlorophenyl)-3,3,3-trifluoroprop-1-en-1-yl pentanoate (4p)**, 15 mg, 50%). Yellow oil;  $^1\text{H}$  NMR (400 MHz,  $\text{CDCl}_3$ )  $\delta$  7.46 – 7.38 (m, 4H), 5.93 (q,  $J = 7.4$  Hz, 1H), 2.60 (t,  $J = 7.5$  Hz, 2H), 1.73 (quintet,  $J = 7.5$  Hz, 2H), 1.49 – 1.38 (m, 2H), 0.98 (t,  $J = 7.4$  Hz, 3H).  $^{19}\text{F}$  NMR (376 MHz,  $\text{CDCl}_3$ )  $\delta$  -58.64 (s, 3F).  $^{13}\text{C}$  NMR (101 MHz,  $\text{CDCl}_3$ )  $\delta$  170.57 (s), 154.32 (q,  $J = 5.7$  Hz), 136.93 (s), 131.53 (s), 129.22 (s), 126.97 (s), 122.22 (q,  $J = 269.8$  Hz), 106.39 (q,  $J = 35.2$  Hz), 33.59 (s), 26.56 (s), 22.13 (s), 13.61 (s). IR (KBr) 3101, 2968, 1774, 1673, 1493, 1328, 1266, 1133, 800, 651  $\text{cm}^{-1}$ . Anal. Calcd for  $\text{C}_{14}\text{H}_{14}\text{ClF}_3\text{O}_2$ : C, 54.83; H, 4.60. Found: C, 54.72; H, 4.51.

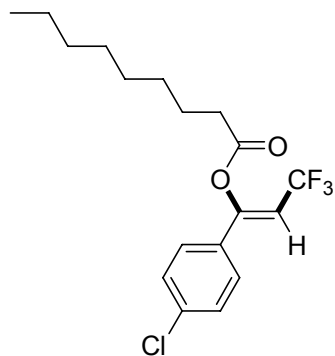

**(Z)-1-(4-chlorophenyl)-3,3,3-trifluoroprop-1-en-1-yl nonanoate (4q)**, 12 mg, 32%). Yellow oil;  $^1\text{H}$  NMR (400 MHz,  $\text{CDCl}_3$ )  $\delta$  7.49 – 7.33 (m, 4H), 5.93 (q,  $J = 7.4$  Hz, 1H), 2.59 (t,  $J = 7.5$  Hz, 2H), 1.80 – 1.68 (m, 2H), 1.42 – 1.25 (m, 10H), 0.91 (t,  $J = 6.8$  Hz, 3H).  $^{19}\text{F}$  NMR (376 MHz,  $\text{CDCl}_3$ )  $\delta$  -58.64 (s, 3F).  $^{13}\text{C}$  NMR (101 MHz,  $\text{CDCl}_3$ )  $\delta$  170.60 (s), 154.32 (q,  $J = 5.7$  Hz), 136.93 (s), 131.54 (s), 129.22 (s), 126.98 (s), 122.22 (q,  $J = 269.9$  Hz), 106.40 (q,  $J = 35.2$  Hz), 33.88 (s), 31.78 (s), 29.14 (s), 29.07 (s), 28.99 (s), 24.54 (s), 22.63 (s), 14.07 (s). IR (KBr) 3101, 2929, 1774, 1673, 1493, 1328, 1266, 1133, 800, 651  $\text{cm}^{-1}$ . Anal. Calcd for  $\text{C}_{18}\text{H}_{22}\text{ClF}_3\text{O}_2$ : C, 59.59; H, 6.11. Found: C, 59.65; H, 6.23.

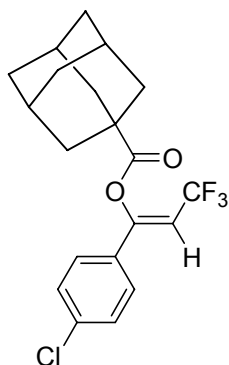

**(Z)-1-(4-chlorophenyl)-3,3,3-trifluoroprop-1-en-1-yl adamantane-1-carboxylate** (**4s**, 24 mg, 62%). Colorless oil;  $^1\text{H}$  NMR (400 MHz,  $\text{CDCl}_3$ )  $\delta$  7.49 – 7.33 (m, 4H), 5.93 (q,  $J = 7.5$  Hz, 1H), 2.12 (br s, 3H), 2.06 (d,  $J = 2.5$  Hz, 6H), 1.85 – 1.74 (m, 6H).  $^{19}\text{F}$  NMR (376 MHz,  $\text{CDCl}_3$ )  $\delta$  -58.19 (s, 3F).  $^{13}\text{C}$  NMR (101 MHz,  $\text{CDCl}_3$ )  $\delta$  174.29 (s), 154.81 (q,  $J = 5.8$  Hz), 136.81 (s), 131.73 (s), 129.21 (s), 126.86 (s), 122.29 (q,  $J = 270.0$  Hz), 106.36 (q,  $J = 35.3$  Hz), 41.16 (s), 38.59 (s), 36.31 (s), 27.80 (s). IR (KBr) 3105, 2911, 2855, 1759, 1673, 1595, 1491, 1266, 1133, 1047, 836, 720, 649  $\text{cm}^{-1}$ . Anal. Calcd for  $\text{C}_{20}\text{H}_{20}\text{ClF}_3\text{O}_2$ : C, 62.42; H, 5.24. Found: C, 62.28; H, 5.32.

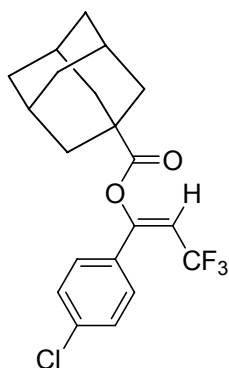

**(E)-1-(4-chlorophenyl)-3,3,3-trifluoroprop-1-en-1-yl adamantane-1-carboxylate** (**4s'**, 5 mg, 13%). Colorless oil;  $^1\text{H}$  NMR (400 MHz,  $\text{CDCl}_3$ )  $\delta$  7.44 – 7.36 (m, 4H), 5.75 (q,  $J = 7.9$  Hz, 1H), 2.07 (br s, 3H), 1.93 (d,  $J = 2.5$  Hz, 6H), 1.77 – 1.67 (m, 6H).  $^{19}\text{F}$  NMR (376 MHz,  $\text{CDCl}_3$ )  $\delta$  -55.64 (s, 3F).  $^{13}\text{C}$  NMR (101 MHz,  $\text{CDCl}_3$ )  $\delta$  174.71 (s), 156.15 (q,  $J = 6.2$  Hz), 136.44 (s), 131.16 (s), 129.63 (q,  $J = 1.8$  Hz, through-space C-F coupling), 128.56 (s), 122.44 (q,  $J = 269.0$  Hz), 109.67 (q,  $J = 35.9$  Hz), 40.98 (s), 38.48 (s), 36.27 (s), 27.72 (s). IR (KBr) 3085, 2913, 2858, 1755, 1680, 1598, 1493, 1363, 1199, 1133, 1058, 835, 772, 702, 565  $\text{cm}^{-1}$ . Anal. Calcd for  $\text{C}_{20}\text{H}_{20}\text{ClF}_3\text{O}_2$ : C, 62.42; H, 5.24. Found: C, 62.56; H, 5.40.

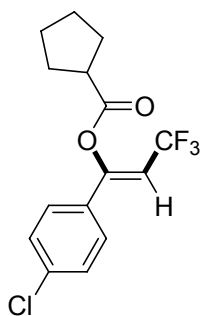

**(Z)-1-(4-chlorophenyl)-3,3,3-trifluoroprop-1-en-1-yl cyclopentanecarboxylate (4t,** 16 mg, 50%). Yellow oil;  $^1\text{H}$  NMR (400 MHz,  $\text{CDCl}_3$ )  $\delta$  7.51 – 7.36 (m, 4H), 5.93 (q,  $J = 7.5$  Hz, 1H), 3.02 (quintet,  $J = 8.0$  Hz, 1H), 2.12 – 1.89 (m, 4H), 1.85 – 1.63 (m, 4H).  $^{19}\text{F}$  NMR (376 MHz,  $\text{CDCl}_3$ )  $\delta$  -58.48 (s, 3F).  $^{13}\text{C}$  NMR (101 MHz,  $\text{CDCl}_3$ )  $\delta$  173.41 (s), 154.51 (q,  $J = 5.7$  Hz), 136.88 (s), 131.66 (s), 129.23 (s), 126.94 (s), 122.26 (q,  $J = 270.0$  Hz), 106.42 (q,  $J = 35.2$  Hz), 43.65 (s), 29.80 (s), 25.67 (s). IR (KBr) 3098, 2962, 1765, 1673, 1595, 1492, 1331, 1115, 800, 651  $\text{cm}^{-1}$ . Anal. Calcd for  $\text{C}_{15}\text{H}_{14}\text{ClF}_3\text{O}_2$ : C, 56.53; H, 4.43. Found: C, 56.62; H, 4.55.

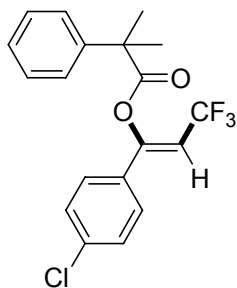

**(Z)-1-(4-chlorophenyl)-3,3,3-trifluoroprop-1-en-1-yl 2-methyl-2-phenylpropanoate (4u,** 23 mg, 62%). Yellow solid;  $^1\text{H}$  NMR (400 MHz,  $\text{CDCl}_3$ )  $\delta$  7.51 – 7.35 (m, 5H), 7.21 (d,  $J = 8.6$  Hz, 2H), 6.94 (d,  $J = 8.6$  Hz, 2H), 5.86 (q,  $J = 7.5$  Hz, 1H), 1.75 (s, 6H).  $^{19}\text{F}$  NMR (376 MHz,  $\text{CDCl}_3$ )  $\delta$  -58.33 (s, 3F).  $^{13}\text{C}$  NMR (101 MHz,  $\text{CDCl}_3$ )  $\delta$  173.04 (s), 154.56 (q,  $J = 5.8$  Hz), 142.43 (s), 136.75 (s), 131.28 (s), 128.92 (s), 128.66 (s), 127.45 (s), 126.90 (s), 126.25 (s), 122.19 (q,  $J = 270.0$  Hz), 106.48 (q,  $J = 35.4$  Hz), 46.42 (s), 25.58 (s). IR (KBr) 3085, 2987, 1755, 1669, 1594, 1489, 1254, 1086, 835, 698, 592  $\text{cm}^{-1}$ . Anal. Calcd for  $\text{C}_{19}\text{H}_{16}\text{ClF}_3\text{O}_2$ : C, 61.88; H, 4.37. Found: C, 62.02; H, 4.51.

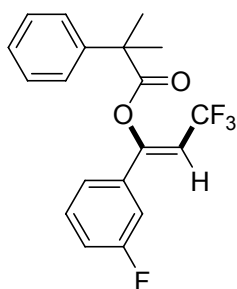

**(Z)-3,3,3-trifluoro-1-(3-fluorophenyl)prop-1-en-1-yl**

**2-methyl-2-phenylpropanoate** (19 mg, 54%). Yellow solid;  $^1\text{H}$  NMR (400 MHz,  $\text{CDCl}_3$ )  $\delta$  7.50 – 7.35 (m, 5H), 7.23 (td,  $J = 8.0, 5.8$  Hz, 1H), 7.07 (td,  $J = 8.2, 2.3$  Hz, 1H), 6.89 (d,  $J = 7.8$  Hz, 1H), 6.70 – 6.62 (m, 1H), 5.89 (q,  $J = 7.5$  Hz, 1H), 1.75 (s, 6H).  $^{19}\text{F}$  NMR (376 MHz,  $\text{CDCl}_3$ )  $\delta$  -58.44 (s, 3F), -111.78 (s, 1F).  $^{13}\text{C}$  NMR (101 MHz,  $\text{CDCl}_3$ )  $\delta$  173.11 (s), 162.66 (d,  $J = 247.5$  Hz), 154.34 (qd,  $J = 5.8, 2.8$  Hz), 142.34 (s), 134.96 (d,  $J = 7.9$  Hz), 130.31 (d,  $J = 8.2$  Hz), 128.70 (s), 127.51 (s), 126.17 (s), 122.11 (q,  $J = 270.0$  Hz), 121.33 (d,  $J = 3.0$  Hz), 117.58 (d,  $J = 21.2$  Hz), 112.74 (d,  $J = 23.8$  Hz), 107.09 (q,  $J = 35.4$  Hz), 46.44 (s), 25.61 (s). IR (KBr) 3089, 2980, 1763, 1673, 1590, 1446, 1332, 1262, 1191, 1086, 784, 698  $\text{cm}^{-1}$ . Anal. Calcd for  $\text{C}_{19}\text{H}_{16}\text{F}_4\text{O}_2$ : C, 64.77; H, 4.58. Found: C, 64.89; H, 3.67.

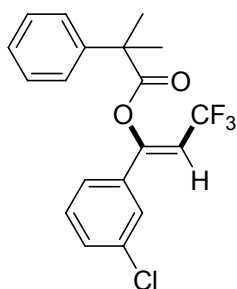

**(Z)-1-(3-chlorophenyl)-3,3,3-trifluoroprop-1-en-1-yl**

**2-methyl-2-phenylpropanoate (4v)**, 22 mg, 60%). Yellow oil;  $^1\text{H}$  NMR (400 MHz,  $\text{CDCl}_3$ )  $\delta$  7.46 (d,  $J = 4.2$  Hz, 4H), 7.39 (dd,  $J = 8.3, 4.1$  Hz, 1H), 7.36 – 7.33 (m, 1H), 7.20 (t,  $J = 8.2$  Hz, 1H), 6.99 (m, 2H), 5.89 (q,  $J = 7.4$  Hz, 1H), 1.75 (s, 6H).  $^{19}\text{F}$  NMR (376 MHz,  $\text{CDCl}_3$ )  $\delta$  -58.41 (s, 3F).  $^{13}\text{C}$  NMR (101 MHz,  $\text{CDCl}_3$ )  $\delta$  173.12 (s), 154.31 (q,  $J = 5.8$  Hz), 142.35 (s), 134.86 (s), 134.60 (s), 130.67 (s), 129.91 (s), 128.79 (s), 127.53 (s), 126.08 (s), 125.71 (s), 123.76 (s), 122.09 (q,  $J = 270.1$  Hz), 107.18 (q,  $J =$

35.4 Hz), 46.44 (s), 25.65 (s). IR (KBr) 3062, 2980, 1763, 1676, 1571, 1477, 1328, 1086, 780, 698  $\text{cm}^{-1}$ .

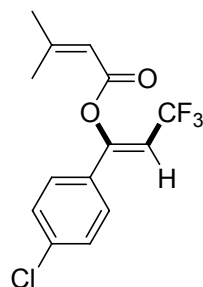

**(Z)-1-(4-chlorophenyl)-3,3,3-trifluoroprop-1-en-1-yl 3-methylbut-2-enoate (4w)**, 15 mg, 49%). Colorless oil;  $^1\text{H}$  NMR (400 MHz,  $\text{CDCl}_3$ )  $\delta$  7.45 (d,  $J = 8.7$  Hz, 2H), 7.39 (d,  $J = 8.7$  Hz, 2H), 5.99 – 5.96 (m, 1H), 5.94 (q,  $J = 7.5$  Hz, 1H), 2.20 (d,  $J = 0.8$  Hz, 3H), 2.03 (d,  $J = 1.0$  Hz, 3H).  $^{19}\text{F}$  NMR (376 MHz,  $\text{CDCl}_3$ )  $\delta$  -58.56 (s, 3F).  $^{13}\text{C}$  NMR (101 MHz,  $\text{CDCl}_3$ )  $\delta$  162.92 (s), 162.77 (s), 154.30 (q,  $J = 5.8$  Hz), 136.73 (s), 131.79 (s), 129.17 (s), 126.99 (s), 122.33 (q,  $J = 269.8$  Hz), 113.67 (s), 106.26 (q,  $J = 35.2$  Hz), 27.77 (s), 20.63 (s). IR (KBr) 3101, 2925, 1747, 1673, 1493, 1332, 1109, 839, 651  $\text{cm}^{-1}$ . Anal. Calcd for  $\text{C}_{14}\text{H}_{12}\text{ClF}_3\text{O}_2$ : C, 55.19; H, 3.97. Found: C, 55.32; H, 4.08.

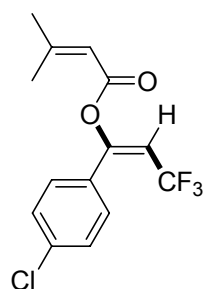

**(E)-1-(4-chlorophenyl)-3,3,3-trifluoroprop-1-en-1-yl 3-methylbut-2-enoate (4w')**, 5 mg, 16%). Colorless oil;  $^1\text{H}$  NMR (400 MHz,  $\text{CDCl}_3$ )  $\delta$  7.45 (d,  $J = 8.5$  Hz, 2H), 7.39 (d,  $J = 8.6$  Hz, 2H), 5.84 – 5.77 (m, 2H), 2.17 (d,  $J = 0.9$  Hz, 3H), 1.97 (d,  $J = 0.9$  Hz, 3H).  $^{19}\text{F}$  NMR (376 MHz,  $\text{CDCl}_3$ )  $\delta$  -55.51 (s, 3F).  $^{13}\text{C}$  NMR (101 MHz,  $\text{CDCl}_3$ )  $\delta$  163.23 (s), 162.31 (s), 155.80 (q,  $J = 6.4$  Hz), 136.32 (s), 131.42 (s), 129.75 (q,  $J = 1.8$  Hz, through-space coupling), 128.53 (s), 122.56 (q,  $J = 269.1$  Hz), 114.09 (s), 109.69 (q,  $J = 36.0$  Hz), 27.70 (s), 20.59 (s). IR (KBr) 3089, 2925, 1743, 1645,

1493, 1207, 1133, 1066, 941, 835  $\text{cm}^{-1}$ . Anal. Calcd for  $\text{C}_{14}\text{H}_{12}\text{ClF}_3\text{O}_2$ : C, 55.19; H, 3.97. Found: C, 55.41; H, 4.16.

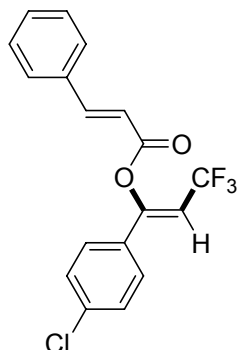

**(Z)-1-(4-chlorophenyl)-3,3,3-trifluoroprop-1-en-1-yl cinnamate (4x, 15 mg, 43%).** Colorless oil;  $^1\text{H}$  NMR (400 MHz,  $\text{CDCl}_3$ )  $\delta$  7.90 (d,  $J = 16.0$  Hz, 1H), 7.65 – 7.60 (m, 2H), 7.52 – 7.43 (m, 5H), 7.41 (d,  $J = 8.7$  Hz, 2H), 6.64 (d,  $J = 16.0$  Hz, 1H), 6.02 (q,  $J = 7.4$  Hz, 1H).  $^{19}\text{F}$  NMR (376 MHz,  $\text{CDCl}_3$ )  $\delta$  -58.53 (s, 3F).  $^{13}\text{C}$  NMR (101 MHz,  $\text{CDCl}_3$ )  $\delta$  163.70 (s), 154.29 (q,  $J = 5.8$  Hz), 148.36 (s), 136.97 (s), 133.74 (s), 131.34 (s), 131.22 (s), 129.25 (s), 129.08 (s), 128.54 (s), 127.03 (s), 122.27 (q,  $J = 269.9$  Hz), 115.45 (s), 106.50 (q,  $J = 35.4$  Hz). IR (KBr) 3066, 2960, 1743, 1633, 1489, 1266, 1117, 800, 761, 679  $\text{cm}^{-1}$ . Anal. Calcd for  $\text{C}_{18}\text{H}_{12}\text{ClF}_3\text{O}_2$ : C, 61.29; H, 3.43. Found: C, 61.41; H, 3.55.

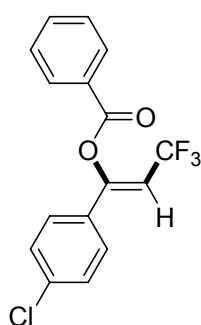

**(Z)-1-(4-chlorophenyl)-3,3,3-trifluoroprop-1-en-1-yl benzoate (4aa, 14 mg, 43%).** Colorless oil;  $^1\text{H}$  NMR (400 MHz,  $\text{CDCl}_3$ )  $\delta$  8.20 (d,  $J = 7.2$  Hz, 2H), 7.71 (t,  $J = 7.5$  Hz, 1H), 7.56 (t,  $J = 7.8$  Hz, 2H), 7.51 (d,  $J = 8.6$  Hz, 2H), 7.40 (d,  $J = 8.7$  Hz, 2H), 6.07 (q,  $J = 7.4$  Hz, 1H).  $^{19}\text{F}$  NMR (376 MHz,  $\text{CDCl}_3$ )  $\delta$  -58.51 (s, 3F).  $^{13}\text{C}$  NMR (101 MHz,  $\text{CDCl}_3$ )  $\delta$  163.63 (s), 154.55 (q,  $J = 5.7$  Hz), 137.05 (s), 134.29 (s), 131.29 (s),



130.42 (s), 129.29 (s), 128.85 (s), 128.06 (s), 127.02 (s), 122.28 (q,  $J = 270.0$  Hz), 106.67 (q,  $J = 35.3$  Hz). IR (KBr) 3077, 2925, 1747, 1669, 1594, 1489, 1266, 1136, 804, 706  $\text{cm}^{-1}$ . Anal. Calcd for  $\text{C}_{16}\text{H}_{10}\text{ClF}_3\text{O}_2$ : C, 58.82; H, 3.09. Found: C, 59.01; H, 3.23.

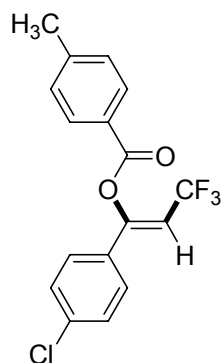

**(Z)-1-(4-chlorophenyl)-3,3,3-trifluoroprop-1-en-1-yl 4-methylbenzoate (4ae**, 19 mg, 56%). White solid;  $^1\text{H}$  NMR (400 MHz,  $\text{CDCl}_3$ )  $\delta$  8.08 (d,  $J = 8.2$  Hz, 2H), 7.50 (d,  $J = 8.6$  Hz, 2H), 7.43-7.33 (m, 4H), 6.06 (q,  $J = 7.4$  Hz, 1H), 2.49 (s, 3H).  $^{19}\text{F}$  NMR (376 MHz,  $\text{CDCl}_3$ )  $\delta$  -58.49 (s).  $^{13}\text{C}$  NMR (101 MHz,  $\text{CDCl}_3$ )  $\delta$  163.66 (s), 154.60 (q,  $J = 5.7$  Hz), 145.34 (s), 136.97 (s), 131.41 (s), 130.49 (s), 129.56 (s), 129.25 (s), 127.00 (s), 125.29 (s), 122.30 (q,  $J = 269.9$  Hz), 106.57 (q,  $J = 35.3$  Hz), 21.81 (s). IR (KBr) 3042, 2925, 1747, 1610, 1493, 1262, 1136, 831, 745  $\text{cm}^{-1}$ . HRMS (ESI)  $m/z$  calcd for  $\text{C}_{17}\text{H}_{16}\text{ClF}_3\text{NO}_2^+$  ( $\text{M}+\text{NH}_4$ ) $^+$  358.0822, found 358.0812.

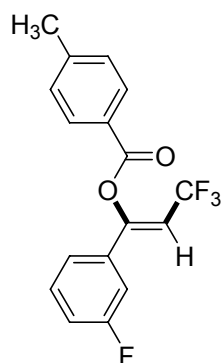

**(Z)-3,3,3-trifluoro-1-(3-fluorophenyl)prop-1-en-1-yl 4-methylbenzoate (4af**, 15 mg, 46%). White solid;  $^1\text{H}$  NMR (400 MHz,  $\text{CDCl}_3$ )  $\delta$  8.09 (d,  $J = 8.2$  Hz, 2H), 7.41 – 7.34 (m, 4H), 7.28 – 7.23 (m, 1H), 7.19 – 7.12 (m, 1H), 6.09 (q,  $J = 7.4$  Hz, 1H), 2.49 (s, 3H).  $^{19}\text{F}$  NMR (376 MHz,  $\text{CDCl}_3$ )  $\delta$  -58.61 (s, 3F), -111.56 (s, 1F).  $^{13}\text{C}$  NMR

(101 MHz, CDCl<sub>3</sub>)  $\delta$  163.65 (s), 162.91 (d,  $J = 247.5$  Hz), 154.33 (qd,  $J = 5.7, 2.8$  Hz), 145.36 (s), 135.14 (d,  $J = 7.7$  Hz), 130.67 (d,  $J = 8.3$  Hz), 130.50 (s), 129.57 (s), 125.25 (s), 122.23 (q,  $J = 270.0$  Hz), 121.42 (d,  $J = 2.9$  Hz), 117.78 (d,  $J = 21.3$  Hz), 112.86 (d,  $J = 23.7$  Hz), 107.23 (q,  $J = 35.4$  Hz), 21.81 (s). IR (KBr) 3105, 2921, 1739, 1673, 1590, 1449, 1269, 1118, 786, 743, 680 cm<sup>-1</sup>. Anal. Calcd for C<sub>17</sub>H<sub>12</sub>F<sub>4</sub>O<sub>2</sub>: C, 62.97; H, 3.73. Found: C, 63.15; H, 3.92.

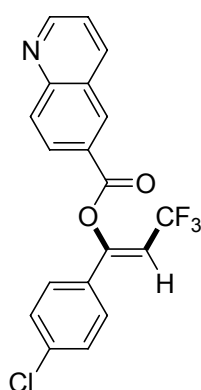

**(Z)-1-(4-chlorophenyl)-3,3,3-trifluoroprop-1-en-1-yl quinoline-6-carboxylate**  
**(4ah, 6 mg, 16%).** Yellow solid; <sup>1</sup>H NMR (400 MHz, CDCl<sub>3</sub>)  $\delta$  9.11 (br s, 1H), 8.78 (s, 1H), 8.41 (dd,  $J = 8.8, 1.8$  Hz, 1H), 8.37 (d,  $J = 8.3$  Hz, 1H), 8.28 (d,  $J = 8.8$  Hz, 1H), 7.58 (dd,  $J = 8.1$  Hz, 3.9 Hz, 1H), 7.54 (d,  $J = 8.6$  Hz, 2H), 7.42 (d,  $J = 8.6$  Hz, 2H), 6.12 (q,  $J = 7.4$  Hz, 1H). <sup>19</sup>F NMR (376 MHz, CDCl<sub>3</sub>)  $\delta$  -58.47 (s, 3F). <sup>13</sup>C NMR (101 MHz, CDCl<sub>3</sub>)  $\delta$  163.17 (s), 154.46 (q,  $J = 5.7$  Hz), 153.13 (s), 150.45 (s), 137.69 (s), 137.21 (s), 132.41 (s), 131.09 (s), 130.42 (s), 129.37 (s), 129.11 (s), 127.03 (s), 126.03 (s), 122.28 (s), 122.25 (s), 122.25 (d,  $J = 269.9$  Hz), 106.85 (q,  $J = 35.4$  Hz). IR (KBr) 3093, 2964, 1747, 1673, 1590, 1493, 1266, 1121, 800, 726, 651 cm<sup>-1</sup>. Anal. Calcd for C<sub>19</sub>H<sub>11</sub>ClF<sub>3</sub>NO<sub>2</sub>: C, 60.41; H, 2.94; N, 3.71. Found: C, 60.55; H, 3.15; N, 3.78. HRMS (ESI)  $m/z$  calcd for C<sub>19</sub>H<sub>12</sub>ClF<sub>3</sub>NO<sub>2</sub> (M+H)<sup>+</sup> 378.0509; found 378.0505.

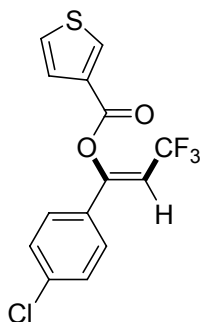

**(Z)-1-(4-chlorophenyl)-3,3,3-trifluoroprop-1-en-1-yl thiophene-3-carboxylate (4ai)**, 14 mg, 42%). Colorless oil;  $^1\text{H}$  NMR (400 MHz,  $\text{CDCl}_3$ )  $\delta$  8.36 (dd,  $J = 3.0, 1.0$  Hz, 1H), 7.65 (dd,  $J = 5.1, 1.0$  Hz, 1H), 7.50 (d,  $J = 8.6$  Hz, 2H), 7.43 (dd,  $J = 5.1, 3.1$  Hz, 1H), 7.40 (d,  $J = 8.7$  Hz, 2H), 6.05 (q,  $J = 7.4$  Hz, 1H).  $^{19}\text{F}$  NMR (376 MHz,  $\text{CDCl}_3$ )  $\delta$  -58.51 (s, 3F).  $^{13}\text{C}$  NMR (101 MHz,  $\text{CDCl}_3$ )  $\delta$  159.27 (s), 154.21 (q,  $J = 6.0$  Hz), 137.04 (s), 135.13 (s), 131.27 (s), 131.19 (s), 129.28 (s), 128.17 (s), 127.02 (s), 126.85 (s), 122.25 (q,  $J = 270.0$  Hz), 106.69 (q,  $J = 35.4$  Hz). IR (KBr) 3113, 2917, 1743, 1673, 1594, 1493, 1328, 1262, 1136, 816, 741, 651  $\text{cm}^{-1}$ . Anal. Calcd for  $\text{C}_{14}\text{H}_8\text{ClF}_3\text{O}_2\text{S}$ : C, 50.54; H, 2.42. Found: C, 50.62; H, 2.55.

### 3. Stereochemistry determination of the products

The *Z*-carboxylate-trifluoromethylation products **4** are generally new products that are unknown in the literature. The assignments of the *Z*- and *E*-stereochemistry is based on the comparison of the isomeric pairs of **4m/4m'**, **4n/4n'**, **4s/4s'** and **4w/4w'**, the previous report of similar *E*-isomeric products<sup>[1-4]</sup> and the observation of through-space C-F coupling of the CF<sub>3</sub> and the phenyl *ortho*-carbon (relative to the vinyl group) in the *E*-isomers that is absent in the *Z*-isomers. Figure S1 summarizes the major NMR differences between *Z*- and *E*-isomeric products, taking **4n/4n'** as example.

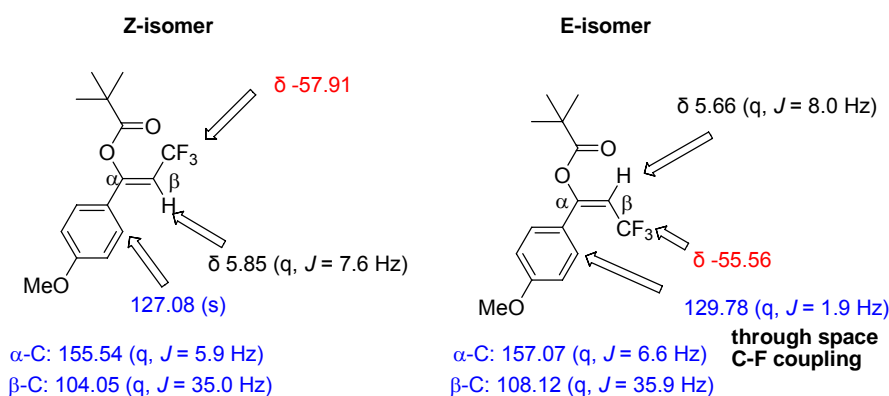

**Figure S1.** Summary of the NMR differences of *Z*- and *E*-isomers. Characteristic <sup>1</sup>H, <sup>19</sup>F and <sup>13</sup>C NMR resonances are marked in black, red and blue in the structures.

Generally, the *E*-isomer possesses significantly upfield shifted vinylic H and downfield shifted CF<sub>3</sub>, and slightly larger coupling constant of <sup>3</sup>*J*<sub>H-F</sub> coupling between H and CF<sub>3</sub> group. Moreover, for the vinyl C<sub>α</sub> and C<sub>β</sub> atoms, the *Z*-isomer has smaller <sup>13</sup>C chemical shifts and C-F coupling constants than those of the *E*-isomer. Finally, there is significant through-space C-F coupling between *ortho*-carbon of phenyl and the CF<sub>3</sub> group that are spatially approaching to each other in the *E*-isomer, as reflected by <sup>13</sup>C NMR spectra of the *E*-isomer.<sup>5</sup> A significant coupling constant of 1.9 Hz is observed (Similar values of 1.6, 1.8 and 1.8 Hz are observed for **4m'**, **4s'** and **4w'**). This effect is expectedly absent in the *Z*-isomer where the phenyl ring and the CF<sub>3</sub> are distal to each other.

*References:*

1. M. Kawatsura, J. Namioka, K. Kajita, M. Yamamoto, H. Tsuji, T. Itoh, *Org. Lett.* **2011**, *13*, 3285.
2. P. G. Janson, I. Gaoneim, N. O. Ilchenko, K. J. Szabó, *Org. Lett.* **2012**, *14*, 2882.
3. H. Egami, R. Shimizu, S. Kawamura, M. Sodeoka, *Tetrahedron Lett.* **2012**, *53*, 5503.
4. R. Tomita, T. Koike, M. Akita, *Angew. Chem. Int. Ed.* **2015**, *54*, 12923.
5. For a similar observation of such through-space C-F coupling of CF<sub>2</sub> with phenyl carbon in *cis*-configuration on the double bond, see: S. Domanski, O. Staszewska-Krajewska, W. Chaladaj, *J. Org. Chem.* **2017**, *78*, 7998.

#### 4. Late-stage modification of dehydrocholic acid

Following the general procedure described in section 2, the desired dehydrocholic trifluoromethylenol ester **6** was obtained in a yield of 20 mg, 33%. As shown by both  $^1\text{H}$  and  $^{19}\text{F}$  NMR, there is very minor amount of the *E*-isomer in a ratio of 1:12 to the major *Z*-isomer.

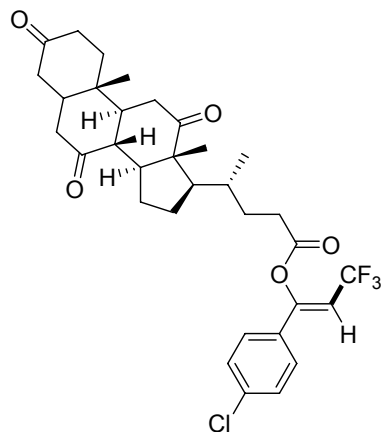

#### **(Z)-1-(4-chlorophenyl)-3,3,3-trifluoroprop-1-en-1-yl**

**(4R)-4-((8R,9S,10S,13R,14S,17R)-10,13-dimethyl-3,7,12-trioxohexadecahydro-1H-cyclopenta[a]phenanthren-17-yl)pentanoate (6; 20 mg, 33%).** Yellow solid;  $^1\text{H}$  NMR (400 MHz,  $\text{CDCl}_3$ )  $\delta$  7.48 – 7.35 (m, 4H), 5.93 (q,  $J = 7.4$  Hz, 1H), 3.15 – 2.81 (m, 4H), 2.74 – 2.49 (m, 2H), 2.42 – 1.89 (m, 13H), 1.64 (td,  $J = 14.3, 5.0$  Hz, 1H), 1.42 (s, 3H), 1.40 – 1.23 (m, 4H), 1.09 (s, 3H), 0.92 (d,  $J = 6.6$  Hz, 3H).  $^{19}\text{F}$  NMR (376 MHz,  $\text{CDCl}_3$ )  $\delta$  -58.58 (s).  $^{13}\text{C}$  NMR (101 MHz,  $\text{CDCl}_3$ )  $\delta$  211.93 (s), 209.03 (s), 208.65 (s), 170.89 (s), 154.31 (q,  $J = 5.8$  Hz), 136.96 (s), 131.45 (s), 129.24 (s), 126.98 (s), 122.21 (q,  $J = 269.9$  Hz), 106.40 (q,  $J = 35.2$  Hz), 56.92 (s), 51.78 (s), 48.99 (s), 46.85 (s), 45.58 (s), 45.57 (s), 44.98 (s), 42.80 (s), 38.64 (s), 36.50 (s), 36.03 (s), 35.29 (s), 35.25 (s), 30.99 (s), 29.99 (s), 27.55 (s), 25.12 (s), 21.91 (s), 18.52 (s), 11.81 (s). IR (KBr) 2963, 1768, 1711, 1673, 1465, 1267, 1122, 816, 914, 729  $\text{cm}^{-1}$ . Anal. Calcd for  $\text{C}_{33}\text{H}_{38}\text{ClF}_3\text{O}_5$ : C, 65.29; H, 6.31. Found: C, 65.38; H, 6.42. HRMS (ESI)  $m/z$  calcd for  $\text{C}_{33}\text{H}_{39}\text{ClF}_3\text{O}_5^+$  ( $\text{M}+\text{H}$ ) $^+$  607.2438, found 607.2443.

Minor *E*-isomer:  $^{19}\text{F}$  NMR (376 MHz,  $\text{CDCl}_3$ )  $\delta$  -55.76 (s).  $^1\text{H}$  NMR: 5.80 (q,  $J = 7.8$  Hz, 1H, vinylic H). The other resonances are overlapping with the major *Z*-isomer.

## 5. Alcolysis of the product 4a

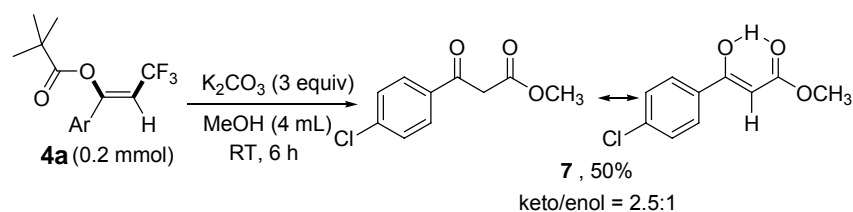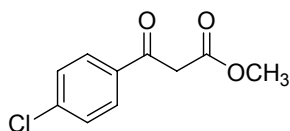

**Methyl 3-(4-chlorophenyl)-3-oxopropanoate (7; 21 mg, 50%).** Yellow oil; A mixture of keto and enol forms in a ratio of 1: 0.4.

Keto form:  $^1\text{H NMR}$  (400 MHz,  $\text{CDCl}_3$ )  $\delta$  7.91 (d,  $J = 8.6$  Hz, 2H), 7.49 (d,  $J = 8.6$  Hz, 2H), 4.01 (s, 2H), 3.78 (s, 3H). Enol form:  $^1\text{H NMR}$  (400 MHz,  $\text{CDCl}_3$ )  $\delta$  12.52 (s, 0.4 H, enol OH), 7.73 (d,  $J = 8.6$  Hz, 0.8H), 7.42 (d,  $J = 8.6$  Hz, 0.8H), 5.67 (s, 0.4H, CH=), 3.83 (s, 1.2 H,  $\text{OCH}_3$ ).

$^{13}\text{C NMR}$  (101 MHz,  $\text{CDCl}_3$ )  $\delta$  191.2 (s), 173.4 (s), 170.2 (s), 167.7 (s), 140.4 (s), 137.4 (s), 134.3 (s), 131.8 (s), 130.0 (s), 129.2 (s), 128.9 (s), 127.4 (s), 87.3 (s), 52.6 (s), 51.6 (s), 45.7 (s).

These data were in accordance with previous literature report (Wahl, B.; Bonin, H.; Mortreux, A.; Giboulot, S.; Liron, F.; Poli, G.; Sauthier, M. *Adv Synth Catal* **2012**, 354 (16), 3105-3114.)

## 6. $^{19}\text{F}$ NMR monitoring of the reaction course

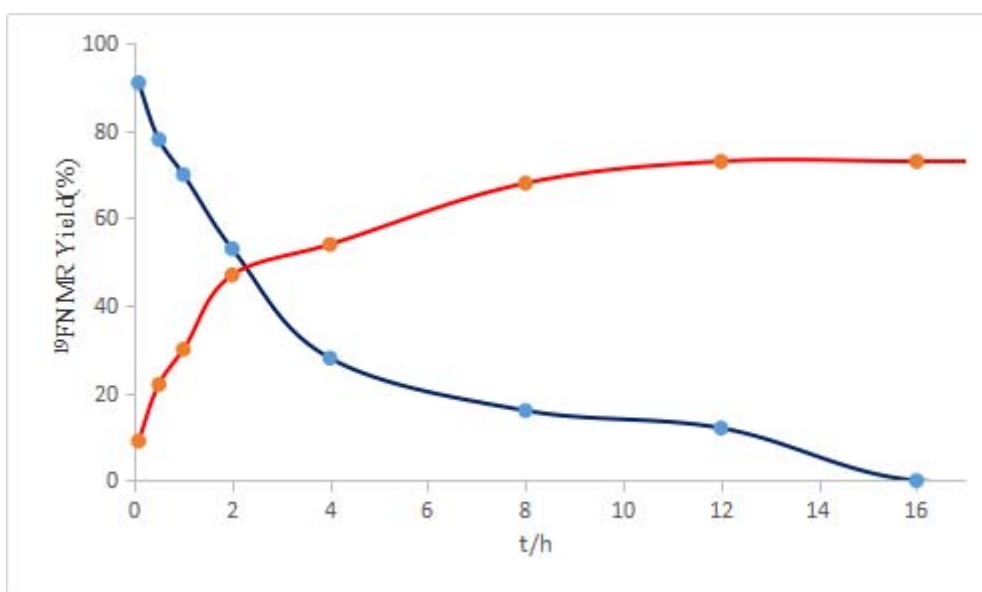

**Figure S2.**  $^{19}\text{F}$  NMR monitoring of the reaction solution in Table 1 in from 5 mins to 0.5, 1, 2, 4, 8, 12, 16 hours respectively. Blue curve: **5a**; red curve: **4a**.

The formation of **5a** is kinetically facile and can reach a yield of ca 90% in only 5 minutes. Then **5a** is gradually consumed with the concurrent accumulation of the desired **4a**. At about 12 hours, the reaction reaches completion, as evidenced by TLC analysis of the crude mixture showing the complete conversion of the alkyne substrate. At this time, **5a** is almost completely consumed and a maximum yield of 72% was achieved for **4a**.



## 7. Mechanistic studies

### Scheme S1. Control reactions, deuterium labeling and radical trapping studies

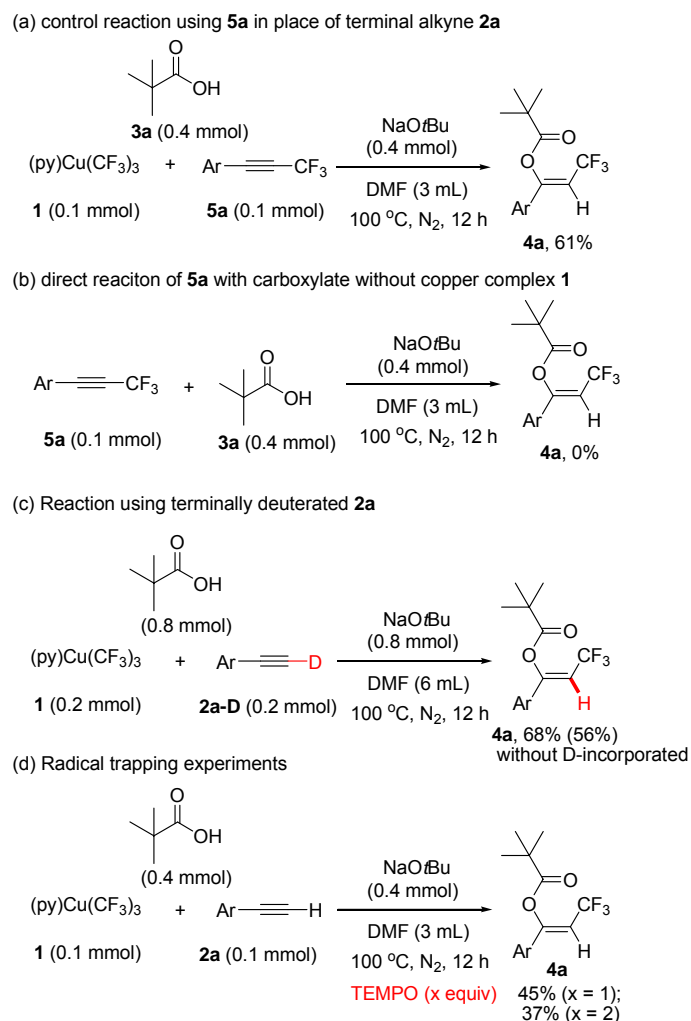

(1) **control experiments** using **5a** in place of terminal alkyne **2a** under the optimized reaction conditions showed that the desired product **4a** was indeed generated in 61% yield (Scheme S1a). It should be emphasized that in the carboxylate addition step, copper is required to promote this reaction; without copper salt, the desired **4a** could not be obtained (Scheme S1b). Possibly the triple bond is activated toward carboxylate attack via coordination by the Lewis acidic copper intermediate.

(2) **Deuterium labeling experiment** using terminally deuterated **2a-D** replacing **2a** showed that the product is still **4a** in a comparable yield of 68% (isolated in 56%) without deuterium incorporation (Scheme S1c). This result and the result in

Scheme 4a indicate that the vinylic proton in product **4a** may probably come from carboxylic acid **3a**, rather than the terminal alkyne.

**(3) Radical trapping experiments** showed that the reaction yield of **4a** greatly reduced to 45% and 37% in the presence of one and two equivalents of radical scavenger TEMPO (Scheme S1d), suggesting that radical species be involved in the reaction course.

## 8. Copies of $^1\text{H}$ , $^{19}\text{F}$ and $^{13}\text{C}$ NMR spectra for all the products

(Z)-1-(4-chlorophenyl)-3,3,3-trifluoroprop-1-en-1-yl pivalate (**4a**) ( $^1\text{H}$  NMR 400 MHz,  $\text{CDCl}_3$ ;  
 $^{19}\text{F}$  NMR 376 MHz,  $\text{CDCl}_3$ ;  $^{13}\text{C}$  NMR 101 MHz,  $\text{CDCl}_3$ ).

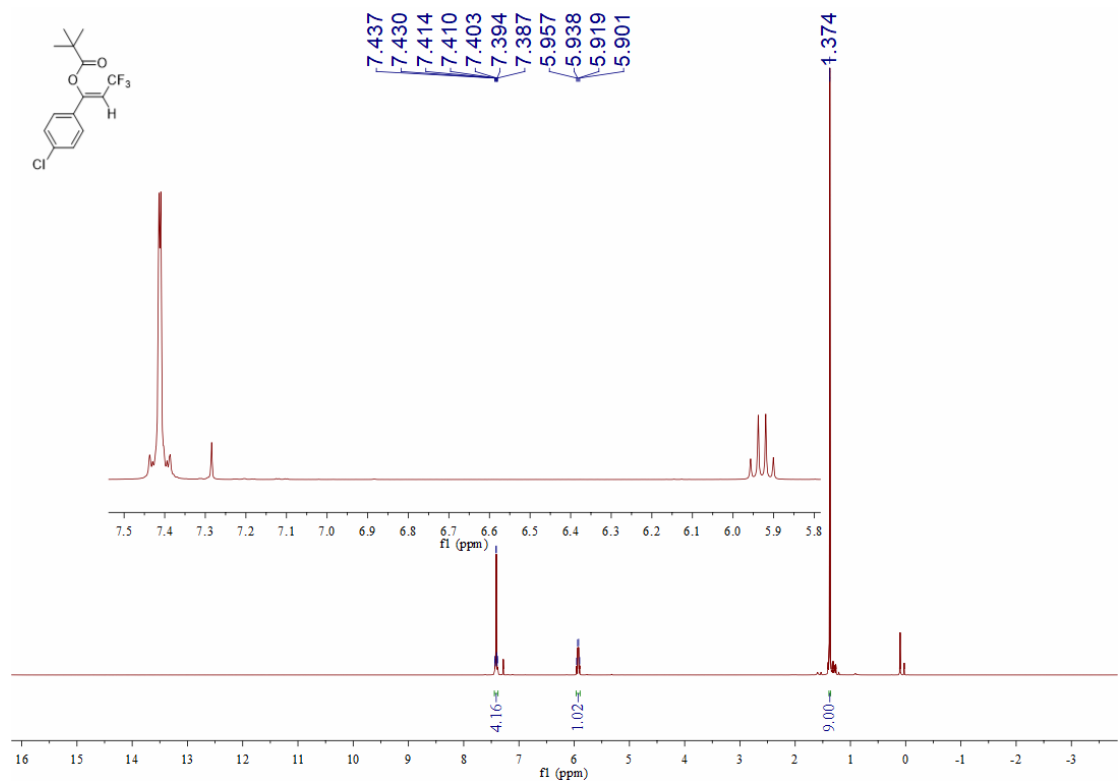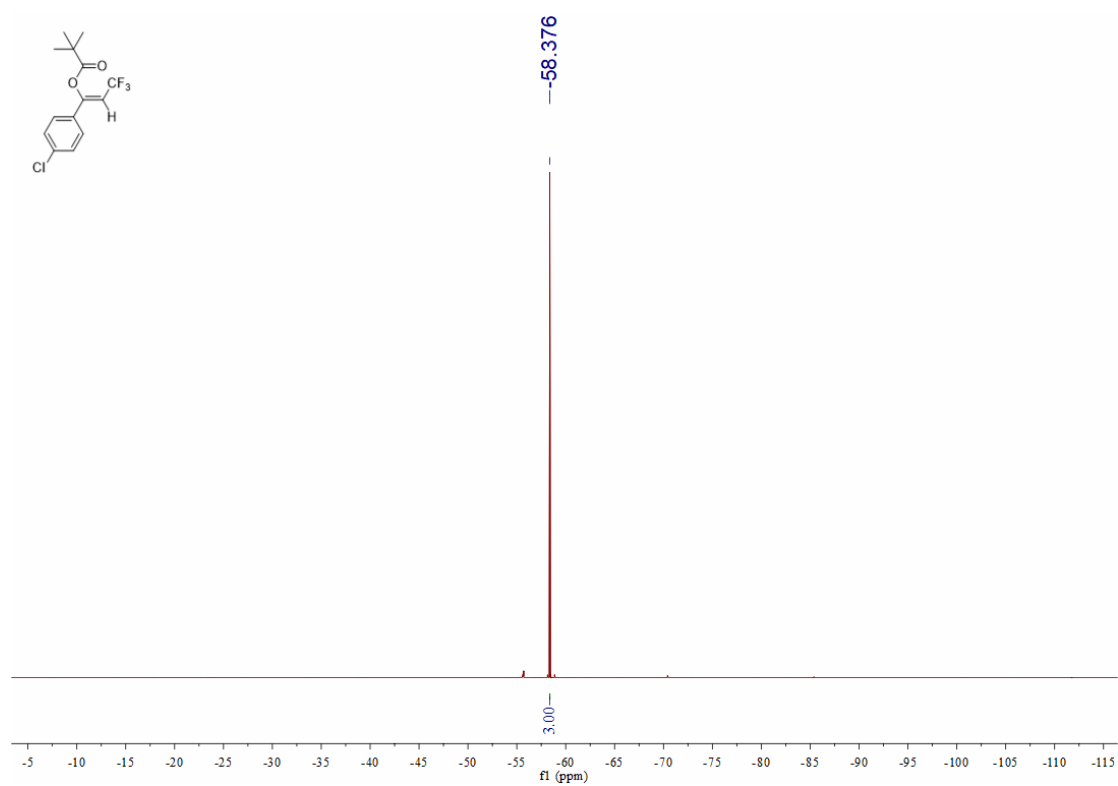

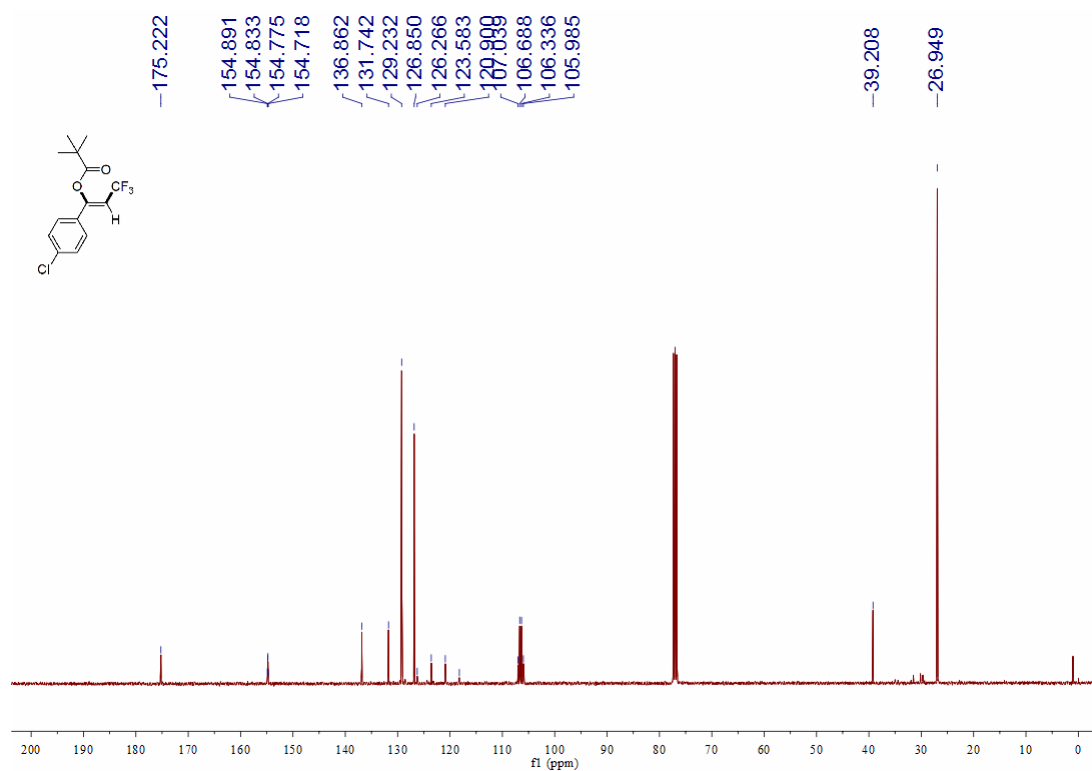

**(Z)-1-(4-cyanophenyl)-3,3,3-trifluoroprop-1-en-1-yl pivalate (4b)** ( $^1\text{H}$  NMR 400 MHz,  $\text{CDCl}_3$ ;  $^{19}\text{F}$  NMR 376 MHz,  $\text{CDCl}_3$ ;  $^{13}\text{C}$  NMR 101 MHz,  $\text{CDCl}_3$ ).

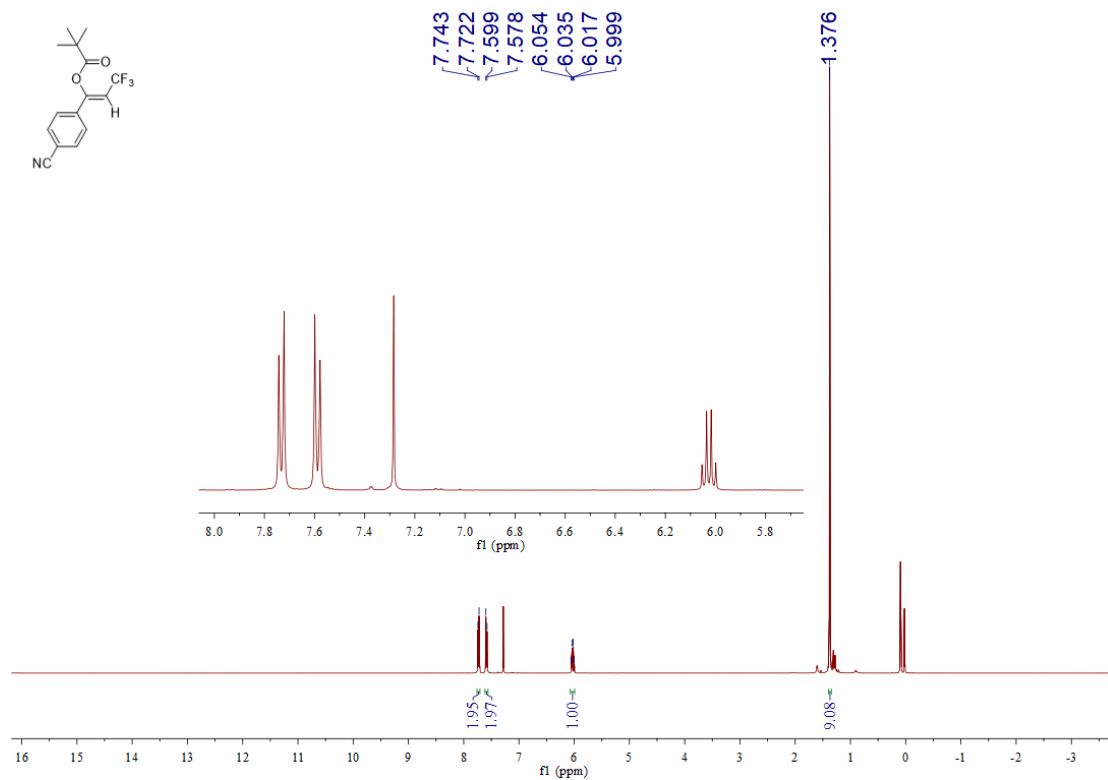

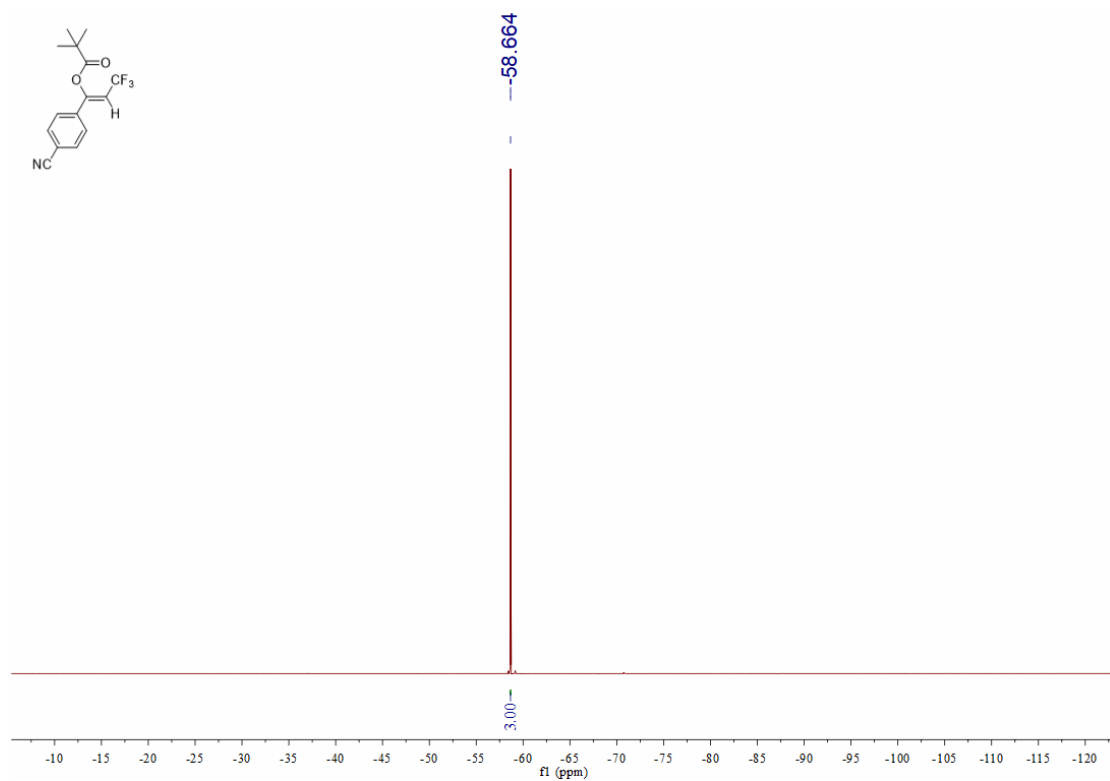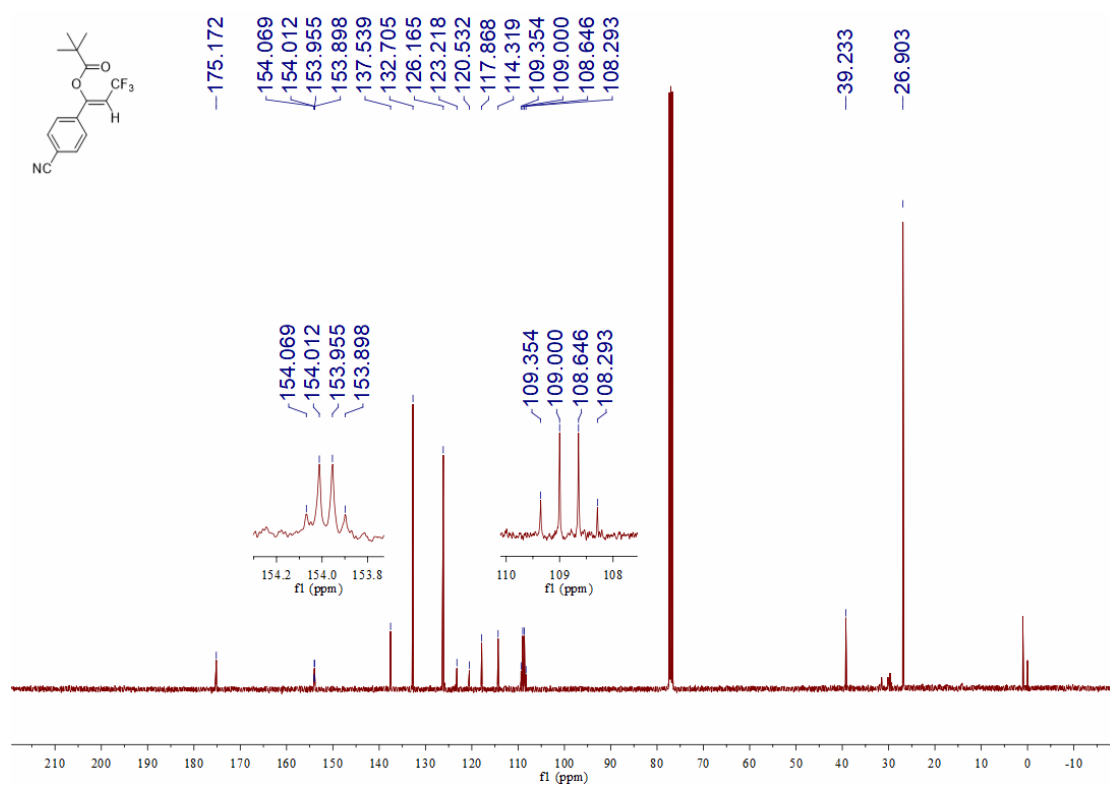

**(Z)-1-(4-acetylphenyl)-3,3,3-trifluoroprop-1-en-1-yl pivalate (4c)** ( $^1\text{H}$  NMR 400 MHz,  $\text{CDCl}_3$ ;  $^{19}\text{F}$  NMR 376 MHz,  $\text{CDCl}_3$ ;  $^{13}\text{C}$  NMR 101 MHz,  $\text{CDCl}_3$ ).

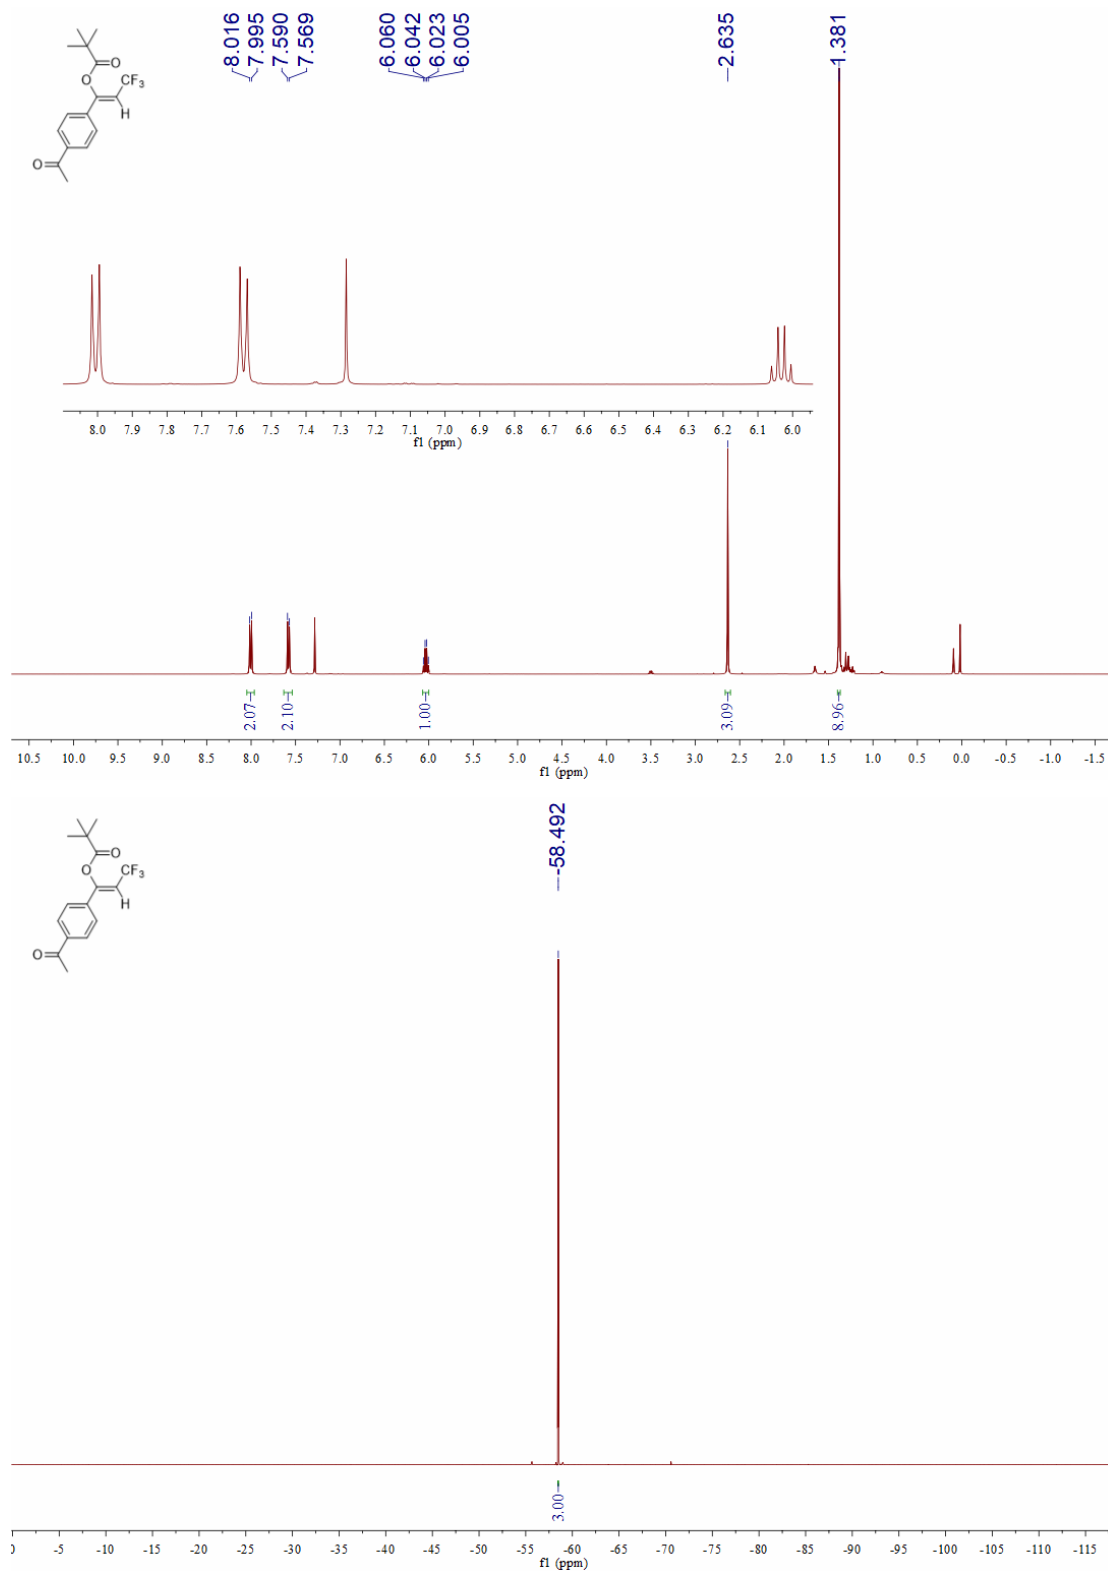

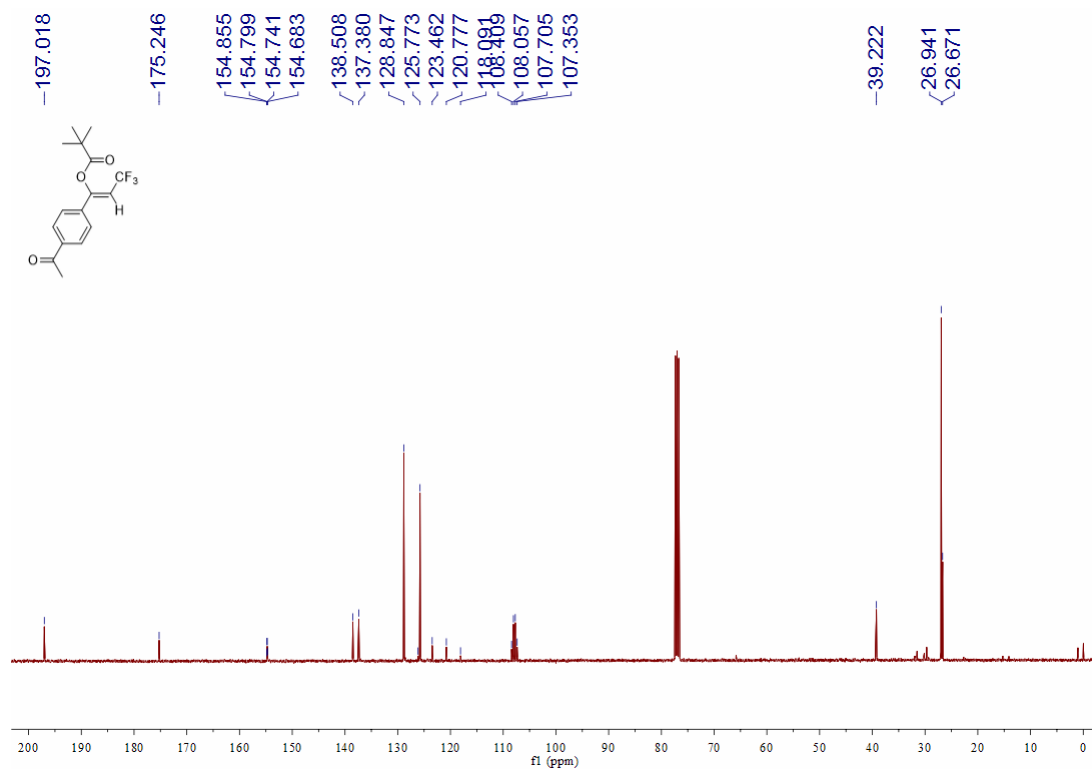

(Z)-3,3,3-trifluoro-1-(4-formylphenyl)prop-1-en-1-yl pivalate (4d) ( $^1\text{H}$  NMR 400 MHz,  $\text{CDCl}_3$ ;  $^{19}\text{F}$  NMR 376 MHz,  $\text{CDCl}_3$ ;  $^{13}\text{C}$  NMR 101 MHz,  $\text{CDCl}_3$ ).

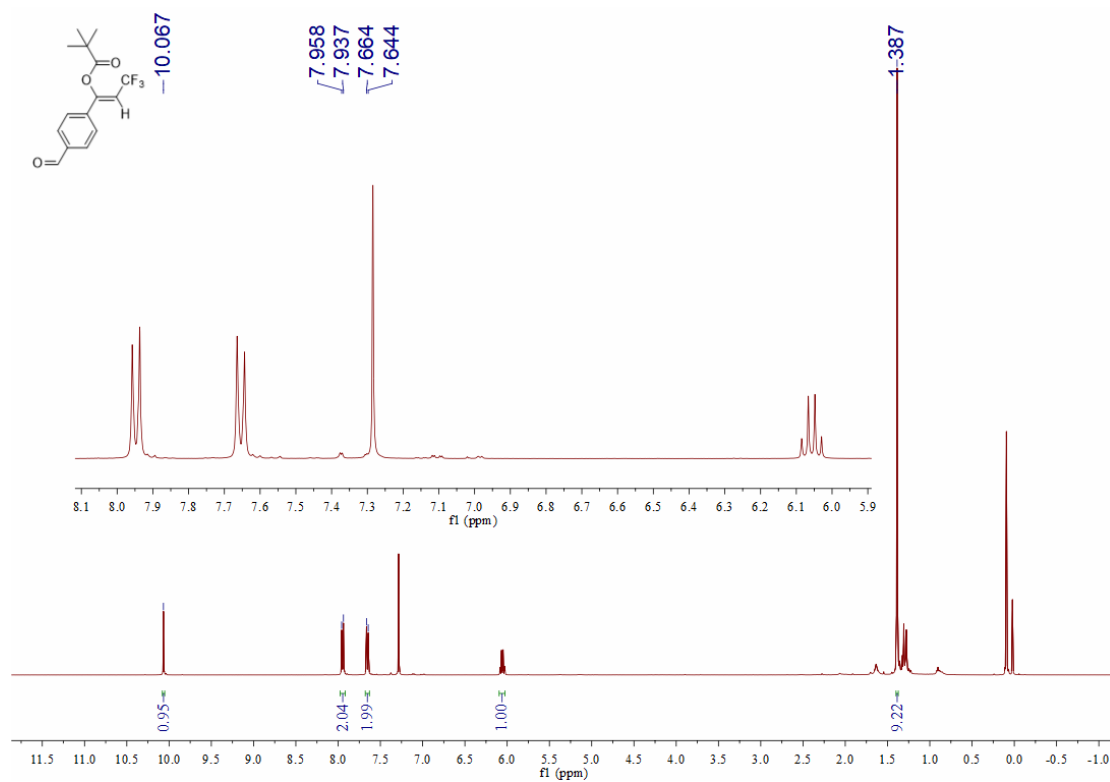

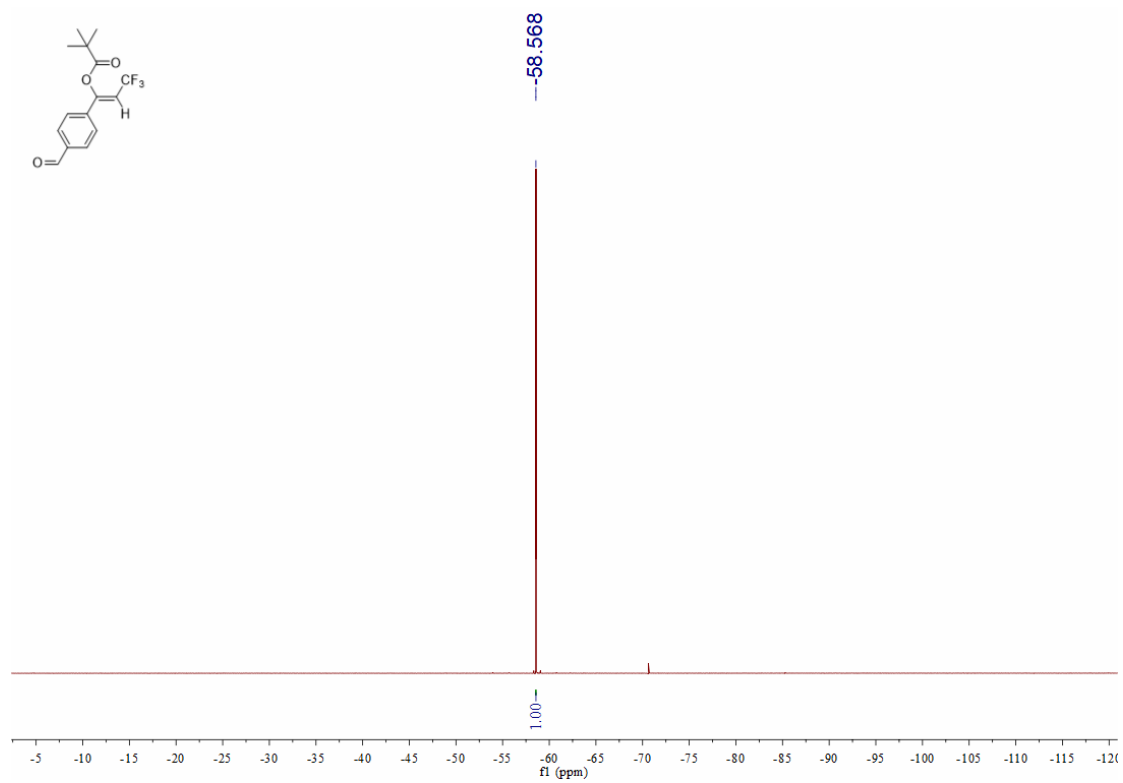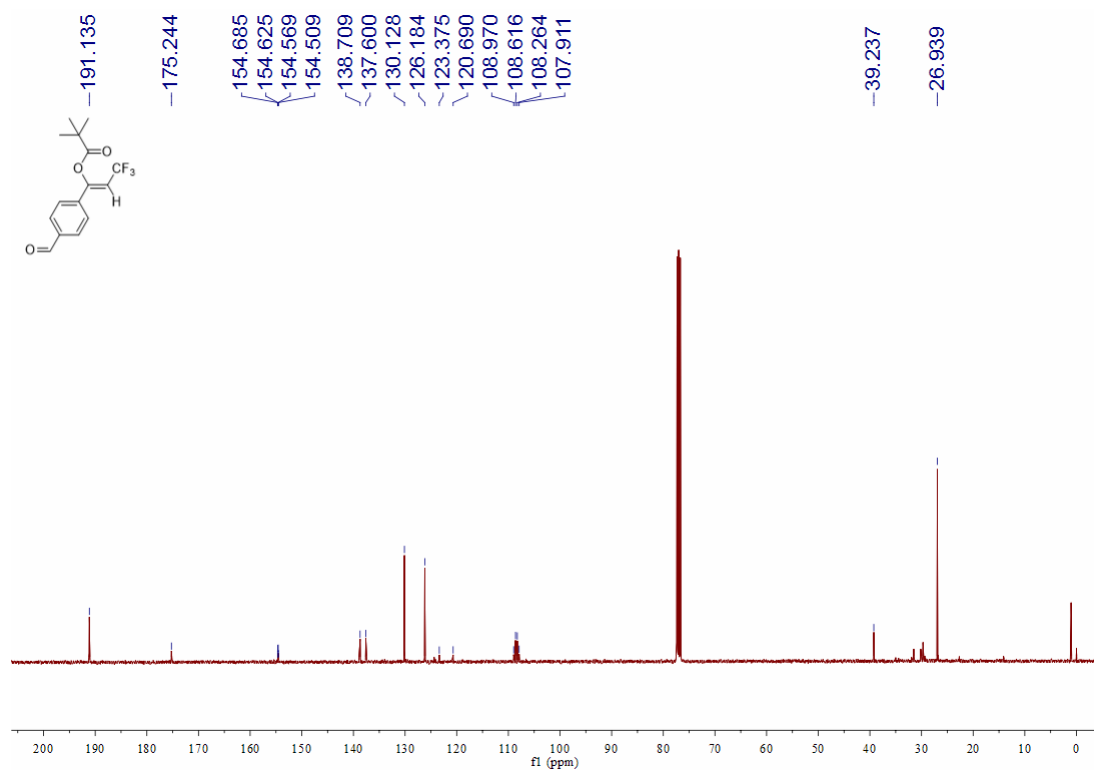



**(Z)-3,3,3-trifluoro-1-(3-fluorophenyl)prop-1-en-1-yl pivalate (4e)** ( $^1\text{NMR}$  400 MHz,  $\text{CDCl}_3$ ;  $^{19}\text{F}$  NMR 376 MHz,  $\text{CDCl}_3$ ;  $^{13}\text{C}$  NMR 101 MHz,  $\text{CDCl}_3$ ).

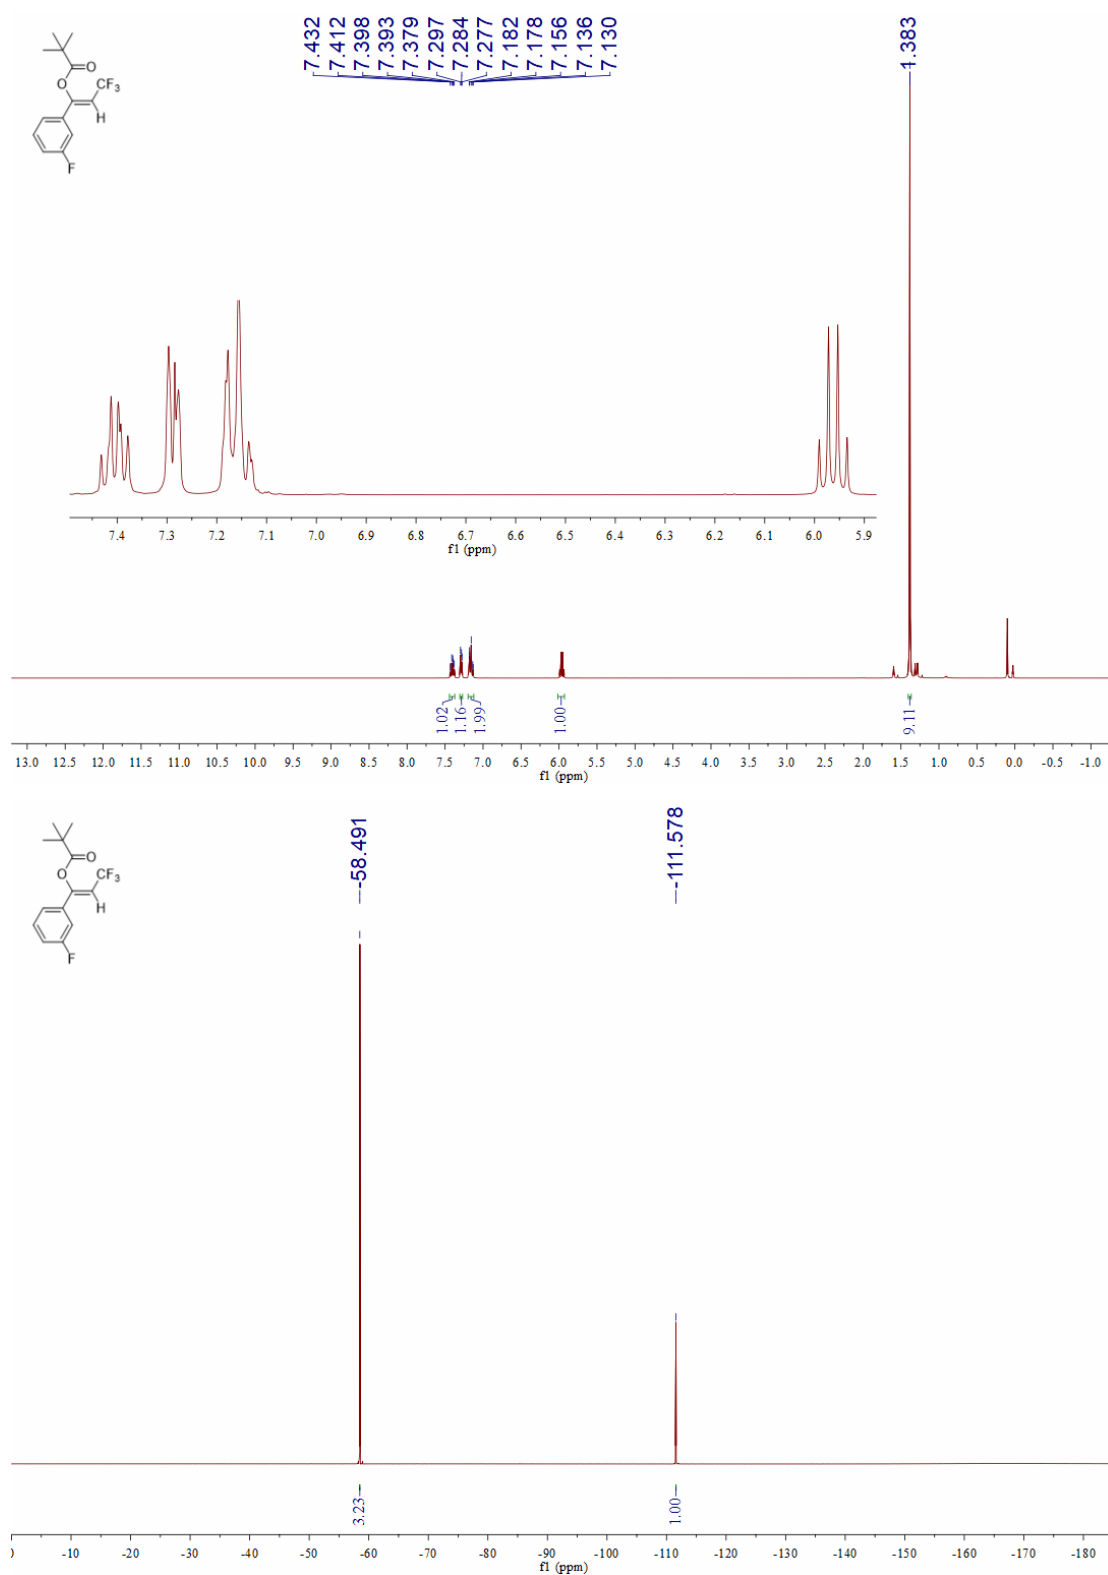

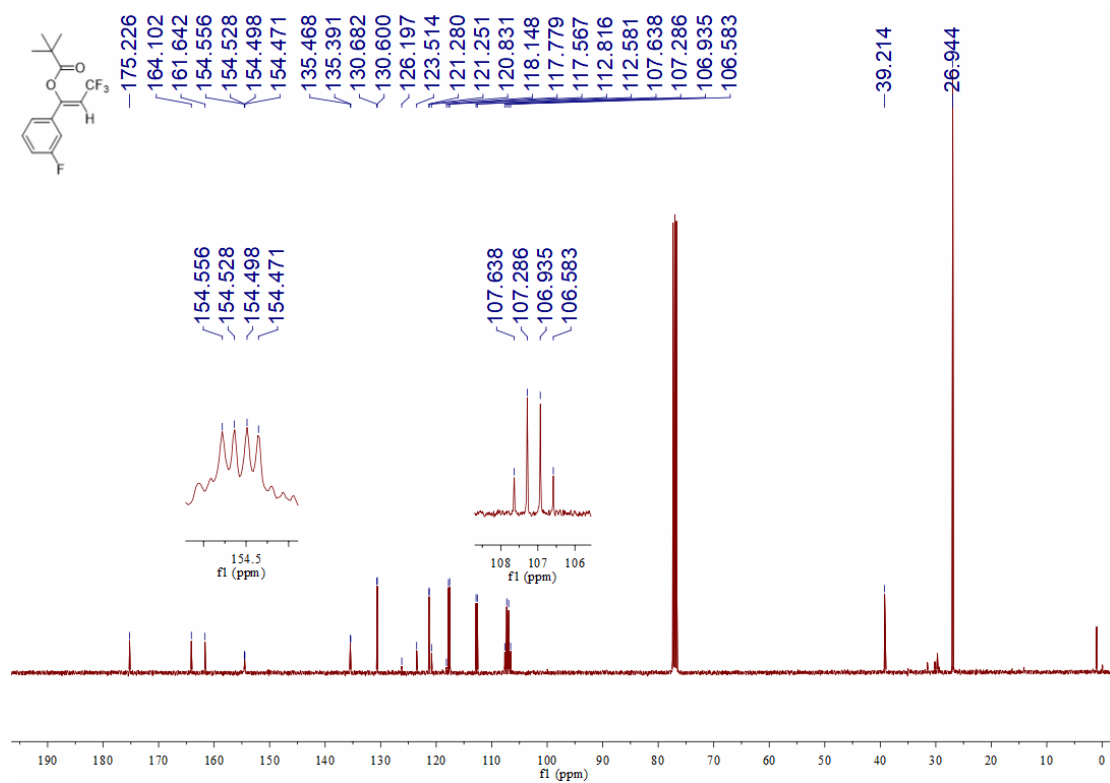

(Z)-1-(4-bromophenyl)-3,3,3-trifluoroprop-1-en-1-yl pivalate (4f) ( $^1\text{H}$  NMR 400 MHz,  $\text{CDCl}_3$ ;  $^{19}\text{F}$  NMR 376 MHz,  $\text{CDCl}_3$ ;  $^{13}\text{C}$  NMR 101 MHz,  $\text{CDCl}_3$ ).

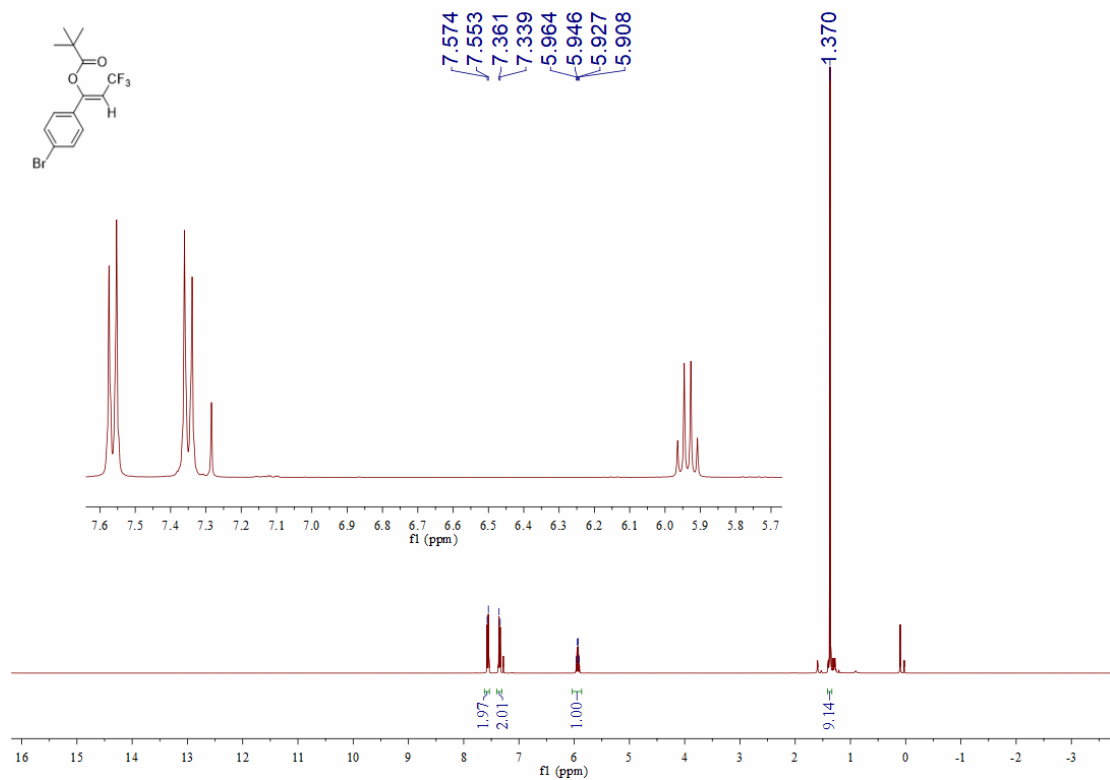

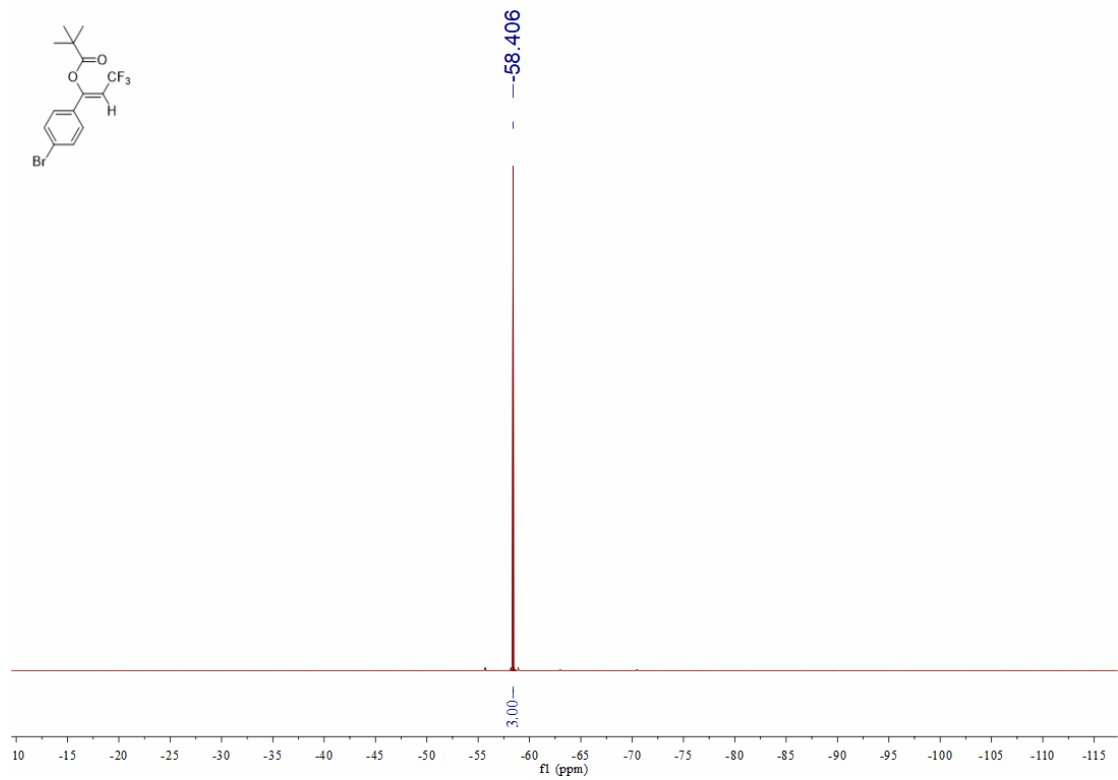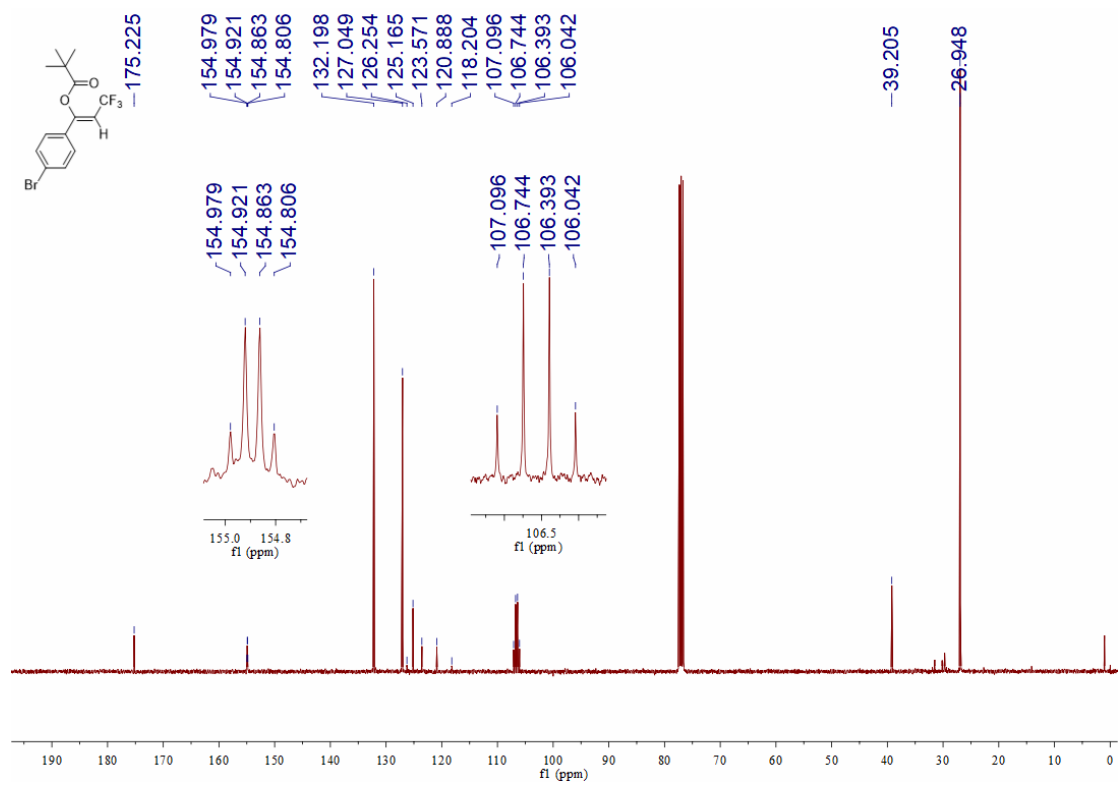

**(Z)-3,3,3-trifluoro-1-(4-(trifluoromethyl)phenyl)prop-1-en-1-yl pivalate (4g)** ( $^1\text{NMR}$  400 MHz,  $\text{CDCl}_3$ ;  $^{19}\text{F}$  NMR 376 MHz,  $\text{CDCl}_3$ ;  $^{13}\text{C}$  NMR 101 MHz,  $\text{CDCl}_3$ ).

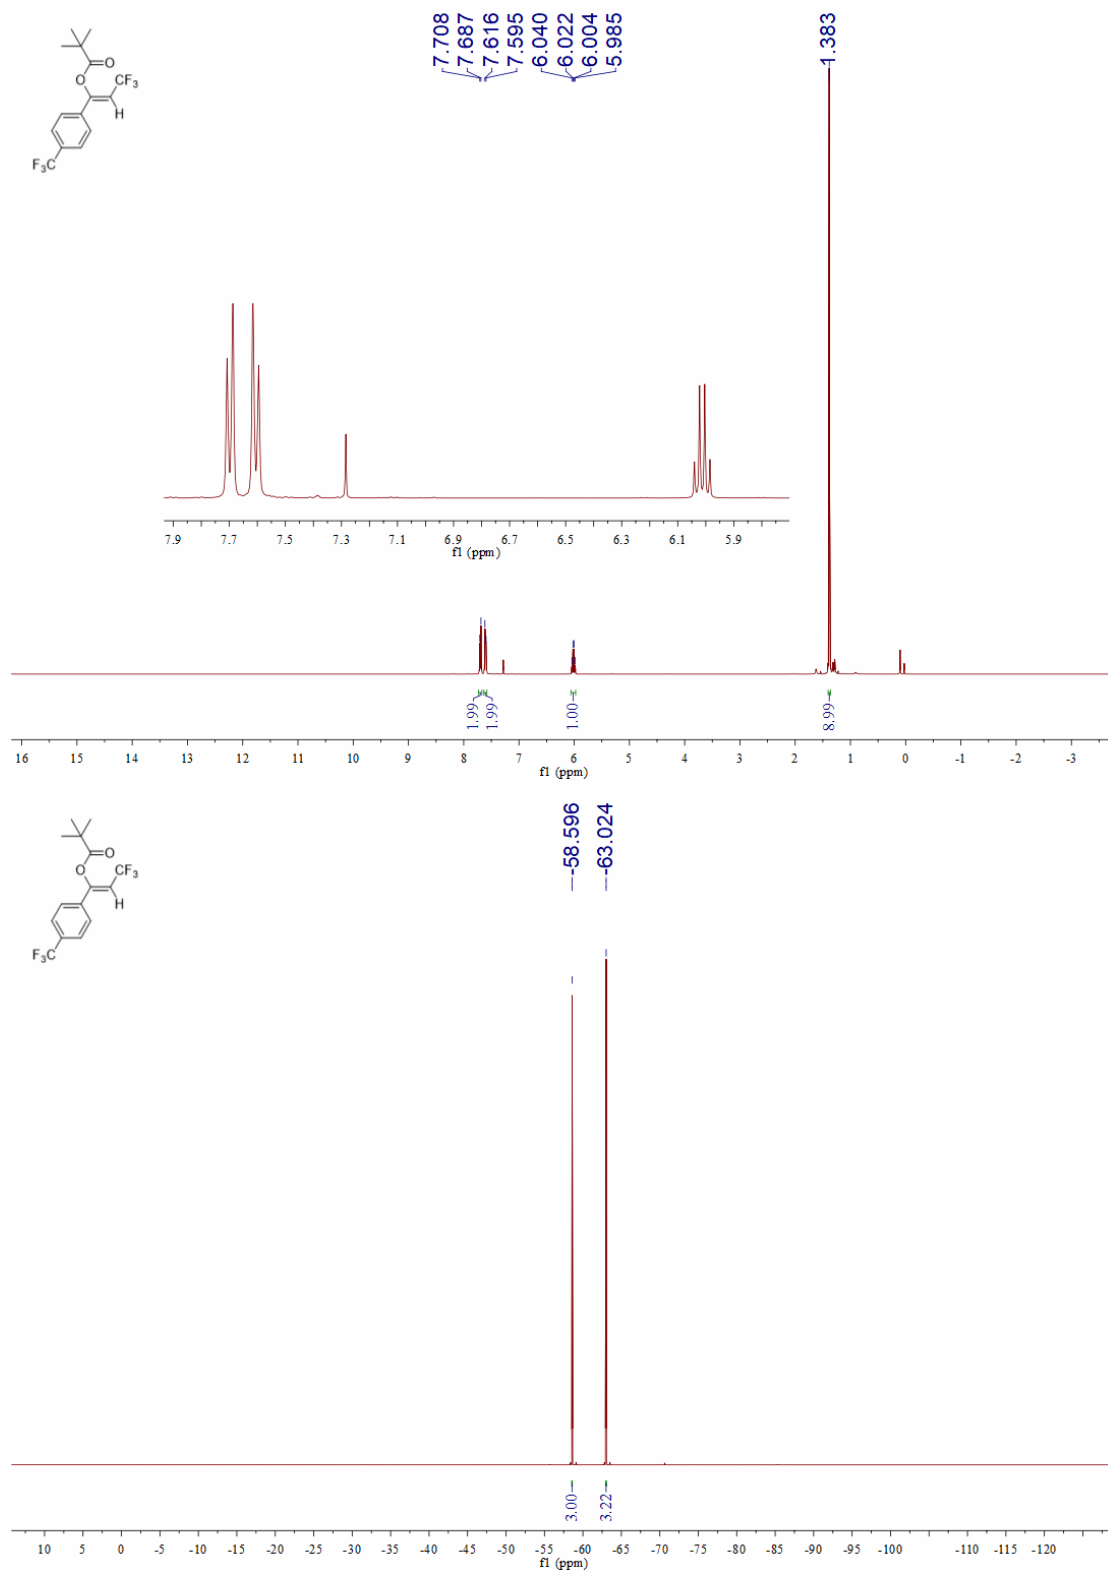

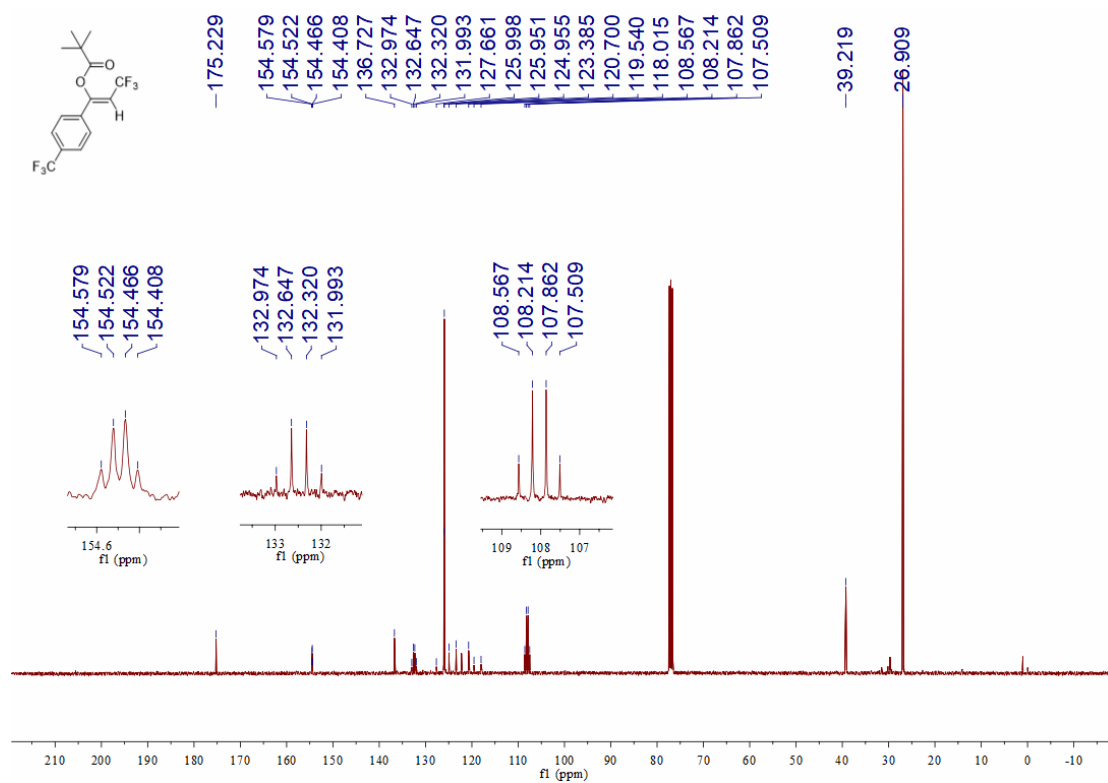

**(Z)-1-(4-(tert-butyl)phenyl)-3,3,3-trifluoroprop-1-en-1-yl pivalate (4h)** ( $^1\text{H}$  NMR 400 MHz,  $\text{CDCl}_3$ ;  $^{19}\text{F}$  NMR 376 MHz,  $\text{CDCl}_3$ ;  $^{13}\text{C}$  NMR 101 MHz,  $\text{CDCl}_3$ ).

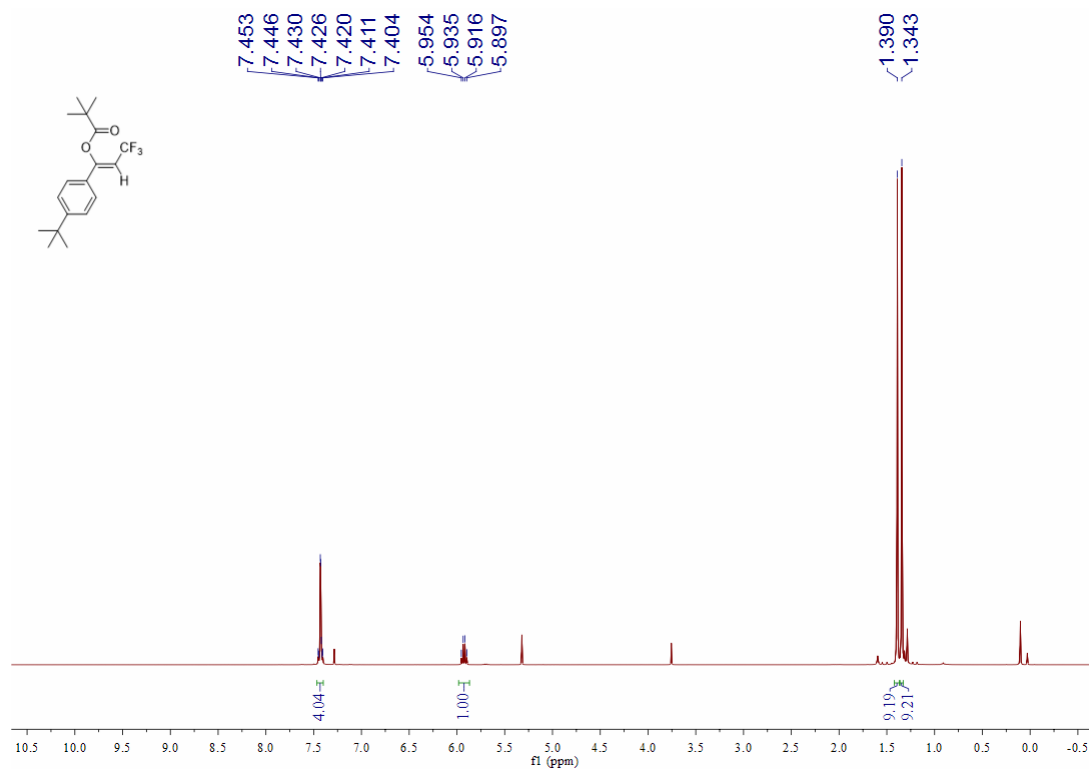

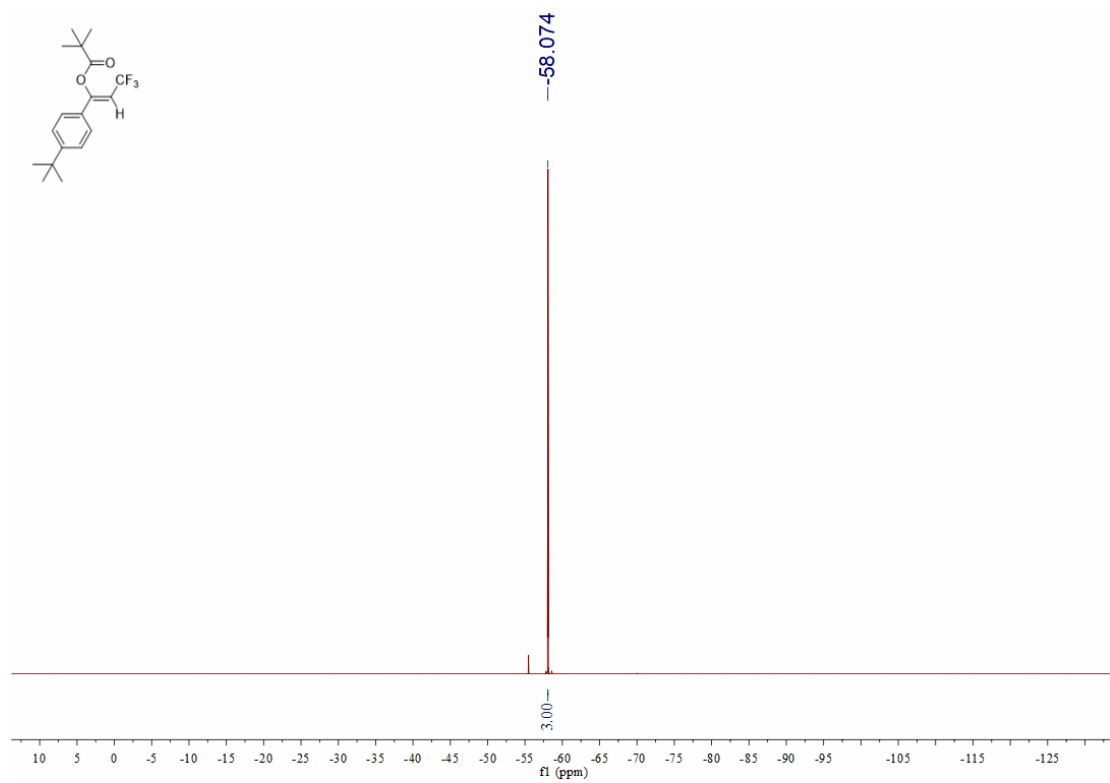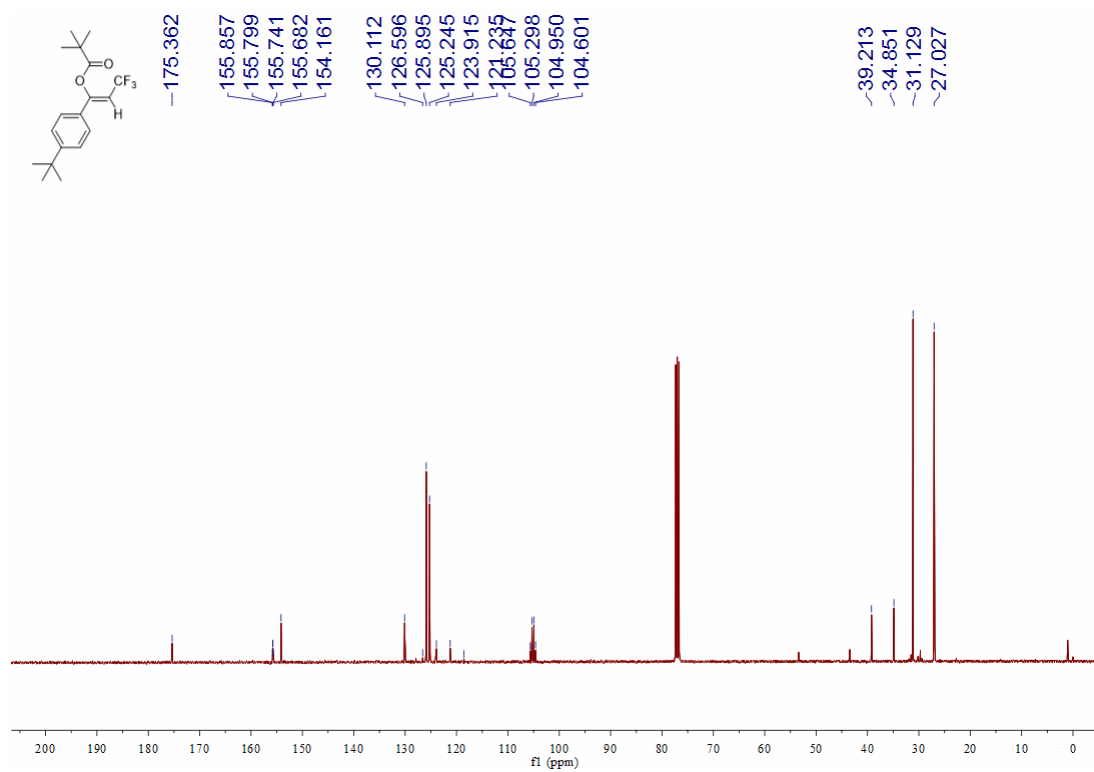

**(Z)-1-(4-ethylphenyl)-3,3,3-trifluoroprop-1-en-1-yl pivalate (4i)** ( $^1\text{H}$  NMR 400 MHz,  $\text{CDCl}_3$ ;  $^{19}\text{F}$  NMR 376 MHz,  $\text{CDCl}_3$ ;  $^{13}\text{C}$  NMR 101 MHz,  $\text{CDCl}_3$ ).

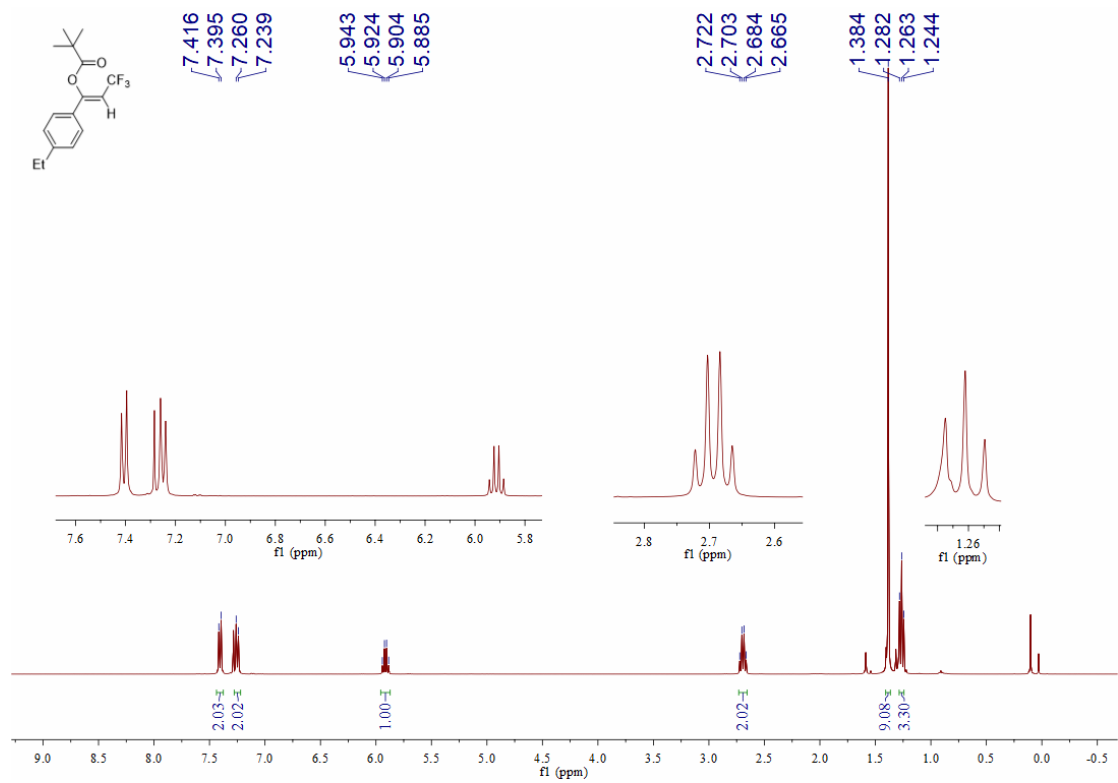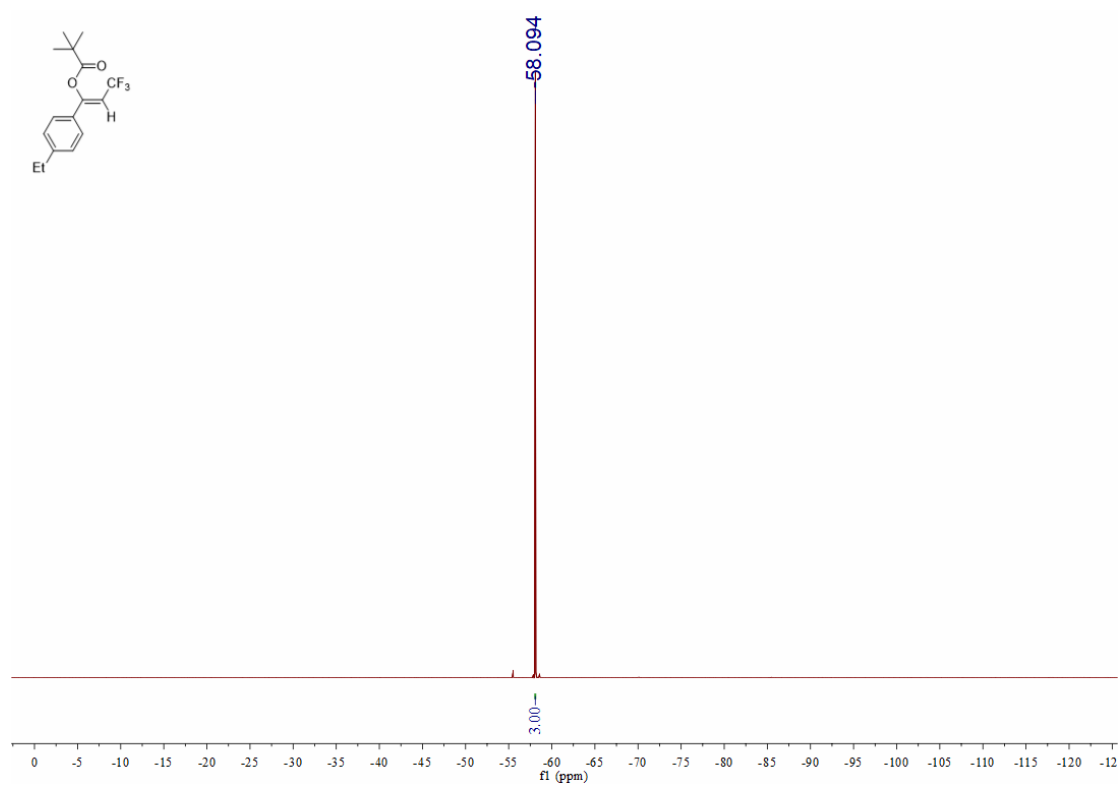

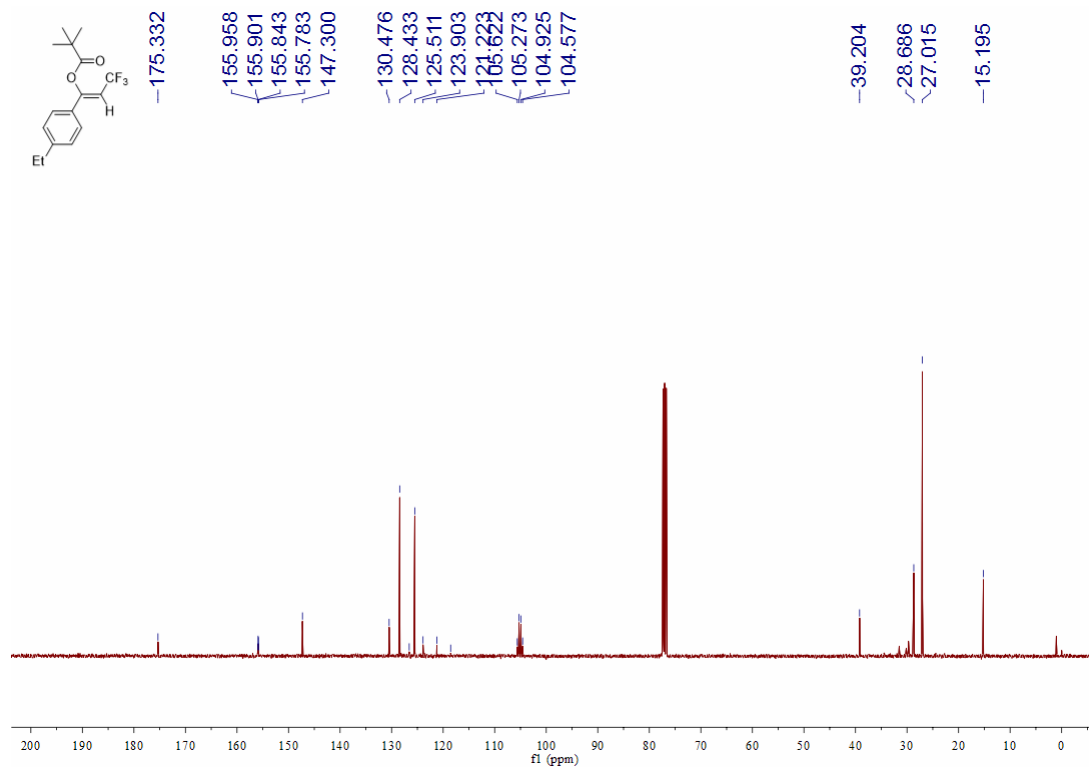

(Z)-3,3,3-trifluoro-1-(pyridin-3-yl)prop-1-en-1-yl pivalate (4j) (<sup>1</sup>H NMR 400 MHz, CDCl<sub>3</sub>; <sup>19</sup>F NMR 376 MHz, CDCl<sub>3</sub>; <sup>13</sup>C NMR 101 MHz, CDCl<sub>3</sub>).

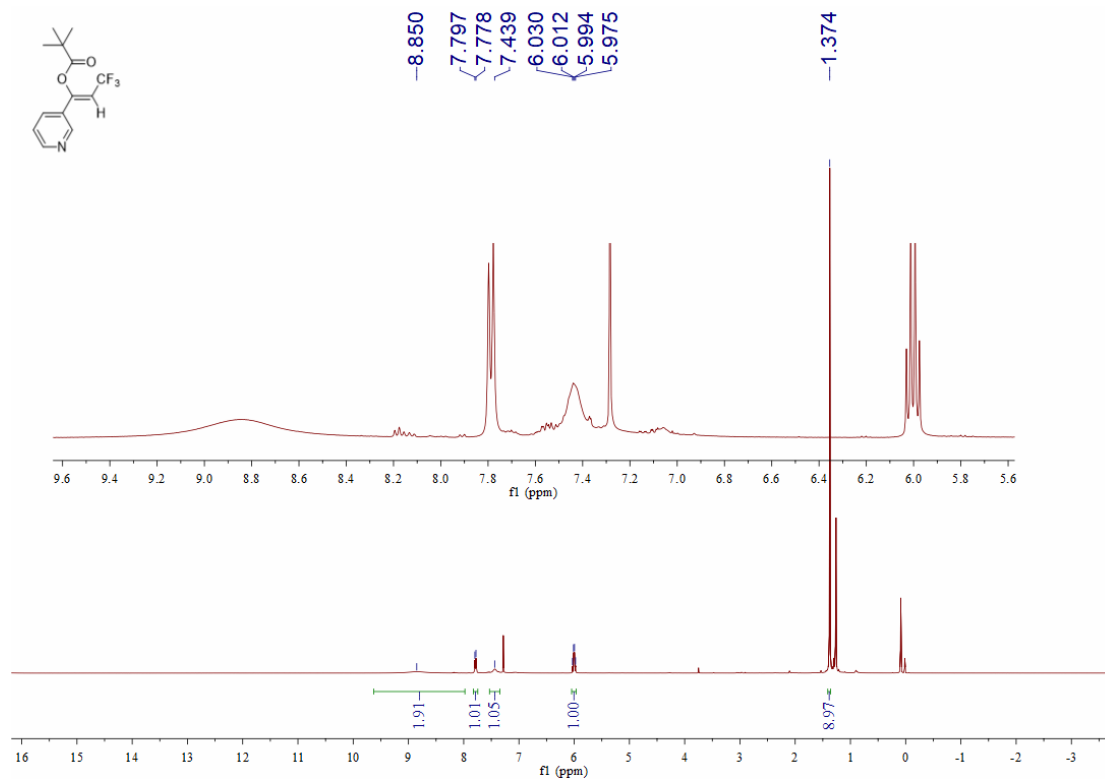



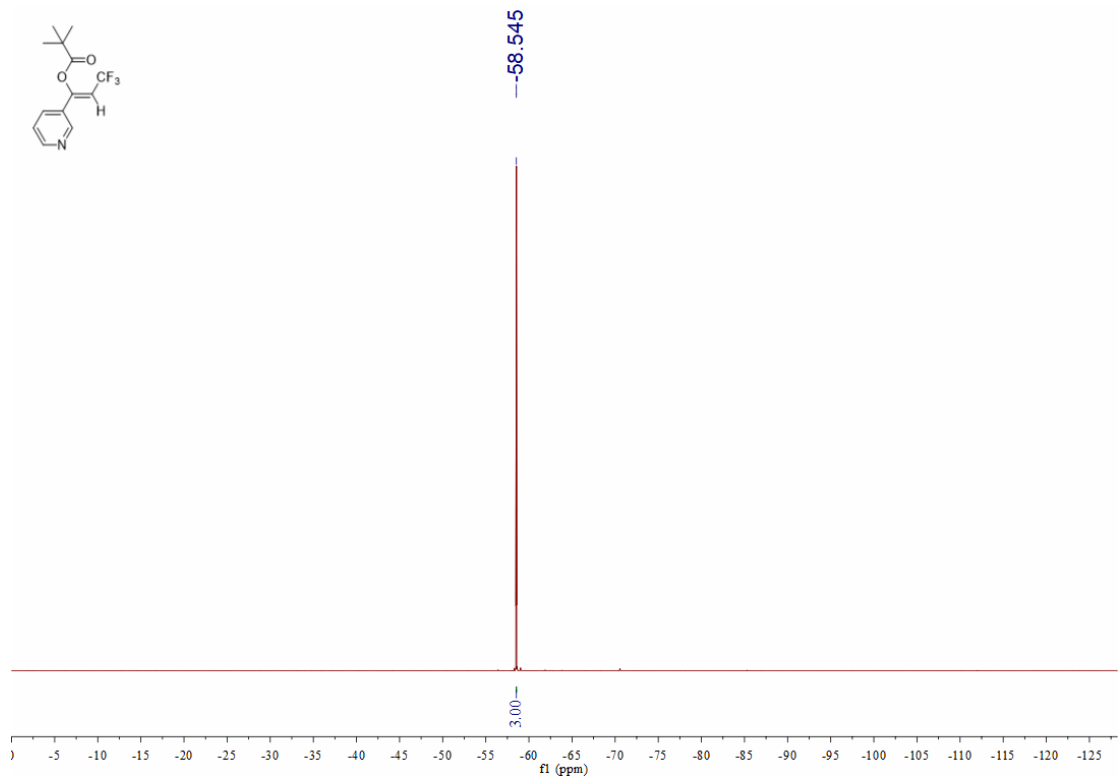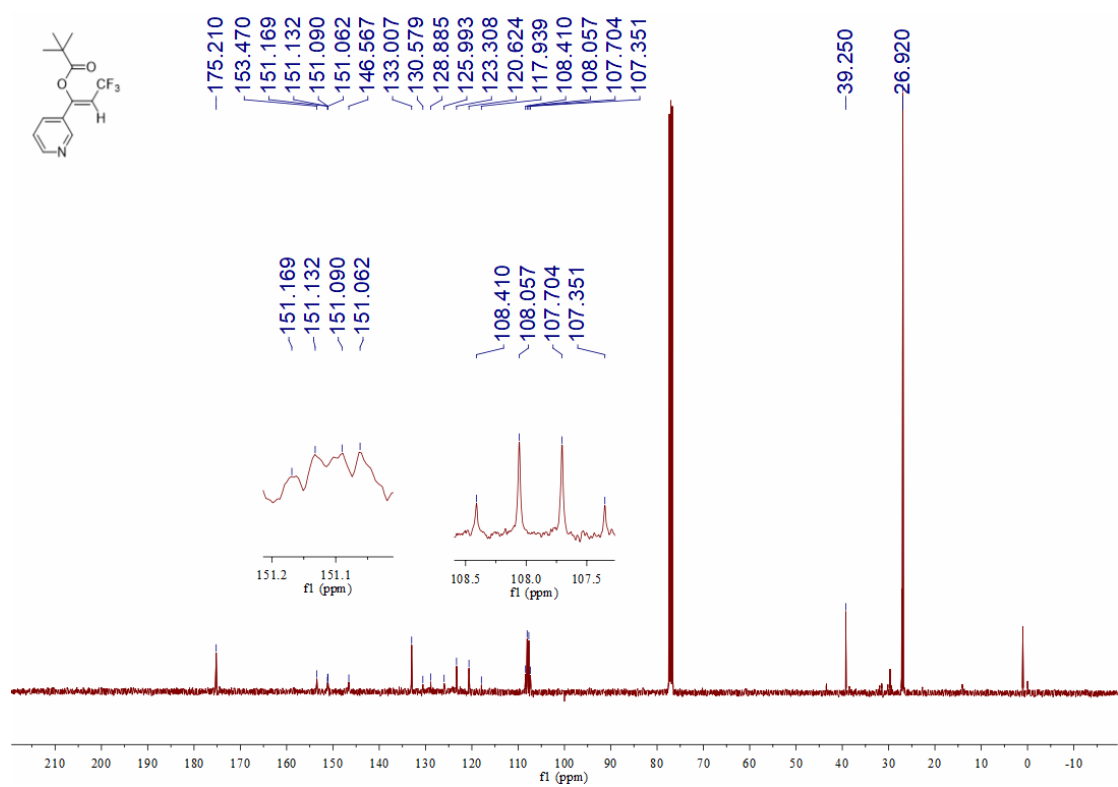

**(Z)-3,3,3-trifluoro-1-(p-tolyl)prop-1-en-1-yl pivalate (4m)** ( $^1\text{H}$  NMR 400 MHz,  $\text{CDCl}_3$ ;  $^{19}\text{F}$  NMR 376 MHz,  $\text{CDCl}_3$ ;  $^{13}\text{C}$  NMR 101 MHz,  $\text{CDCl}_3$ ).

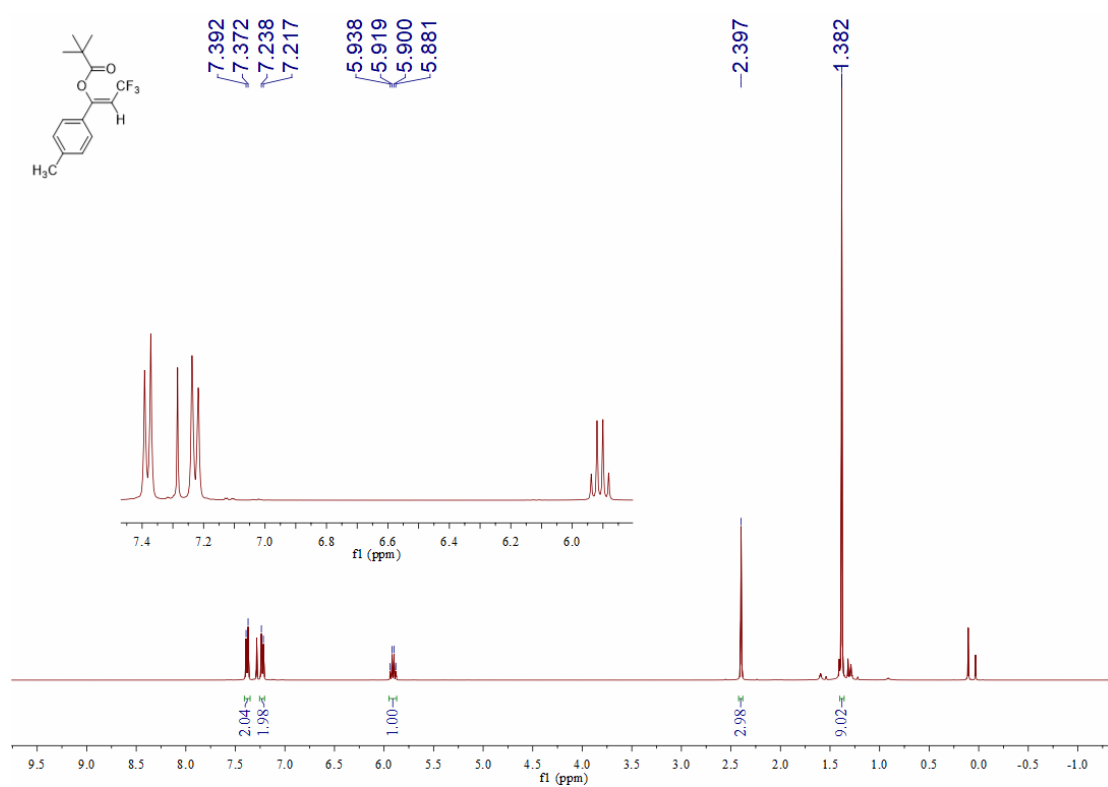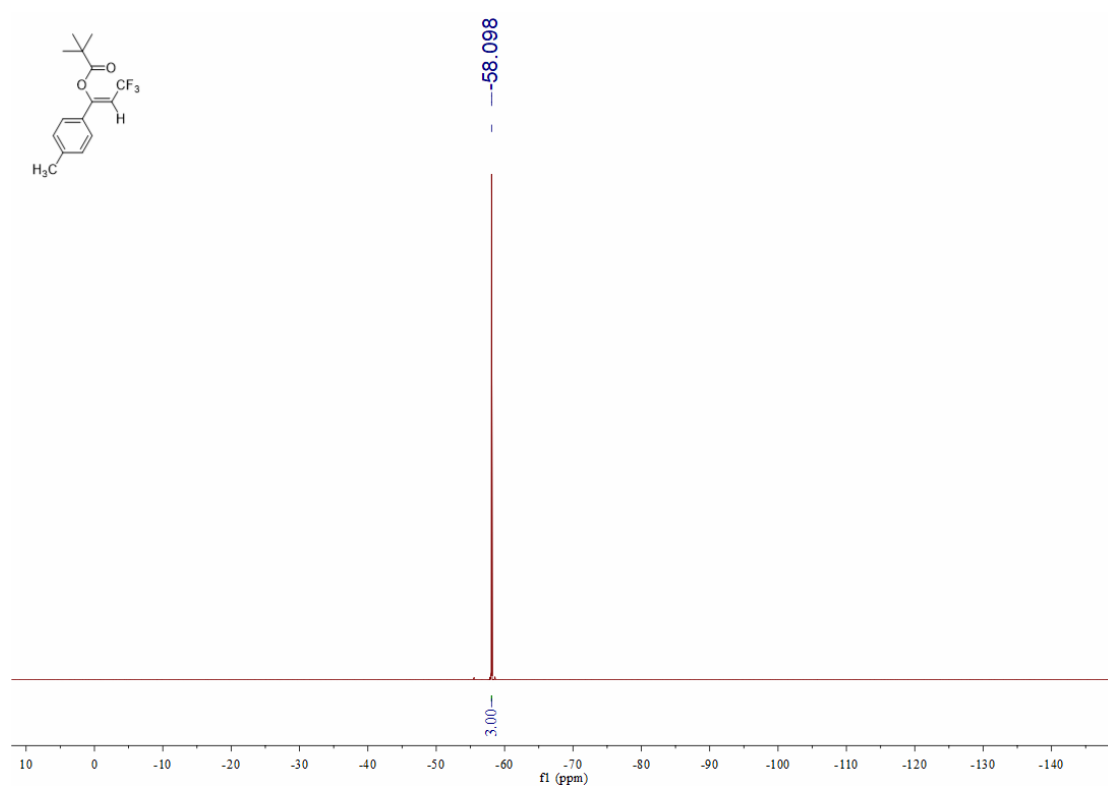

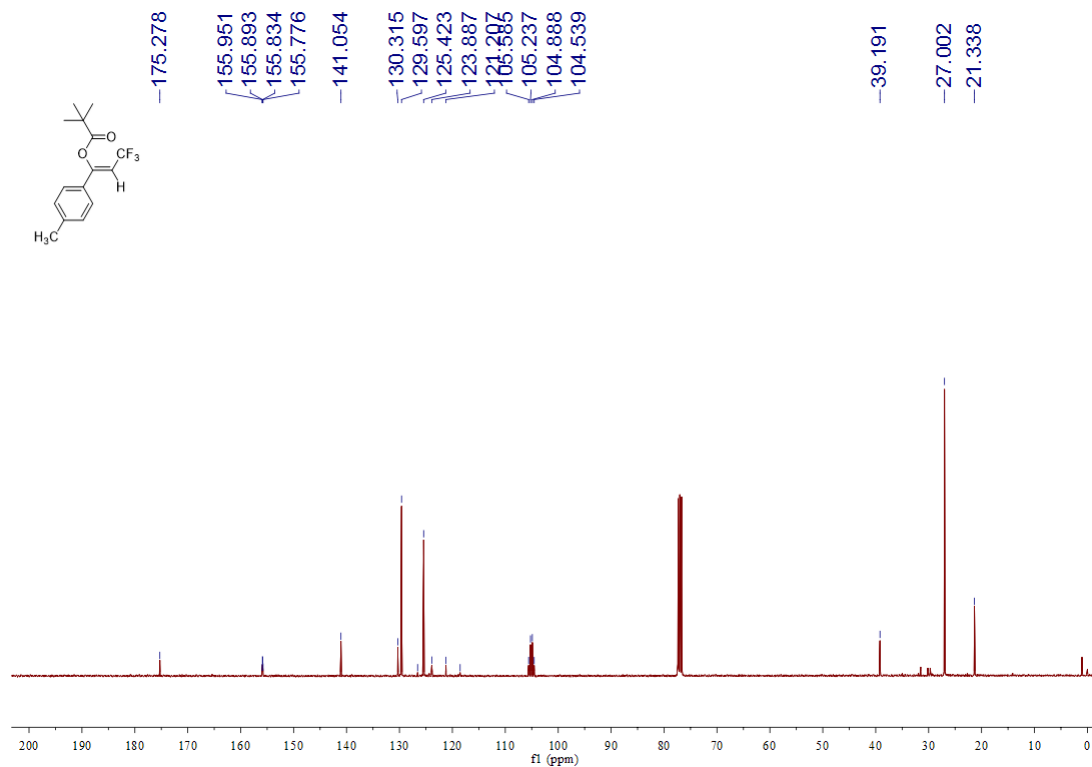

**(E)-3,3,3-trifluoro-1-(p-tolyl)prop-1-en-1-yl pivalate (4m')** ( $^1\text{H}$  NMR 400 MHz,  $\text{CDCl}_3$ ;  $^{19}\text{F}$  NMR 376 MHz,  $\text{CDCl}_3$ ;  $^{13}\text{C}$  NMR 101 MHz,  $\text{CDCl}_3$ ).

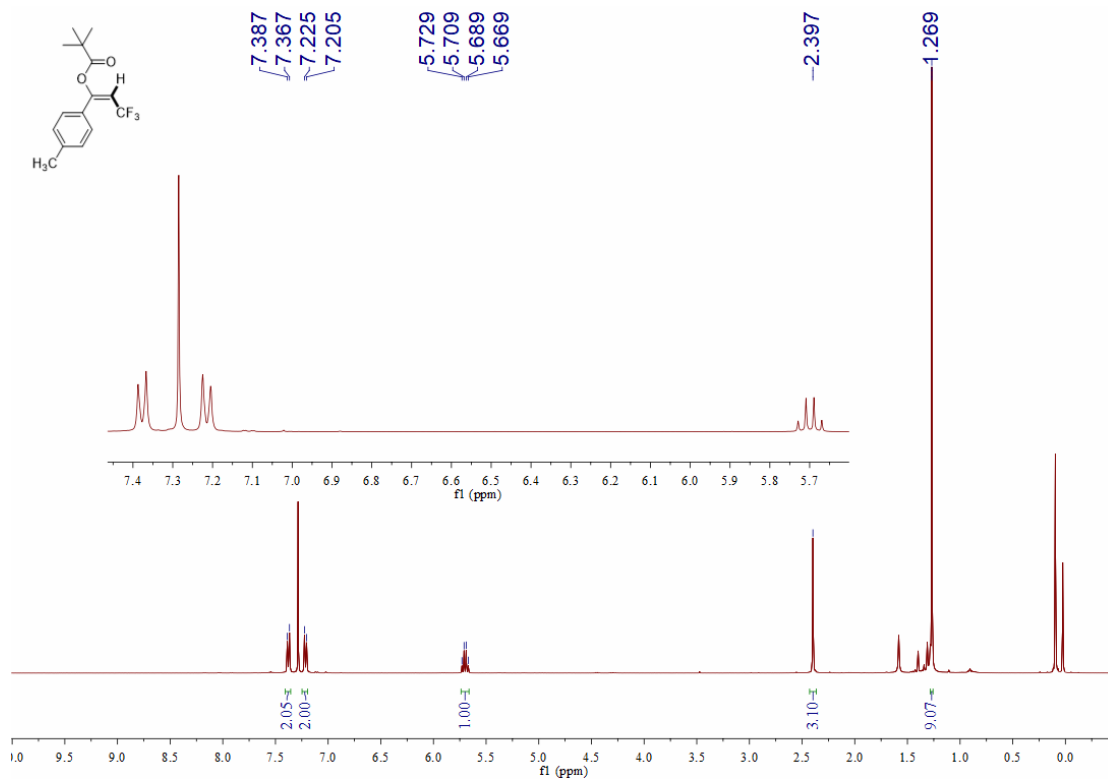

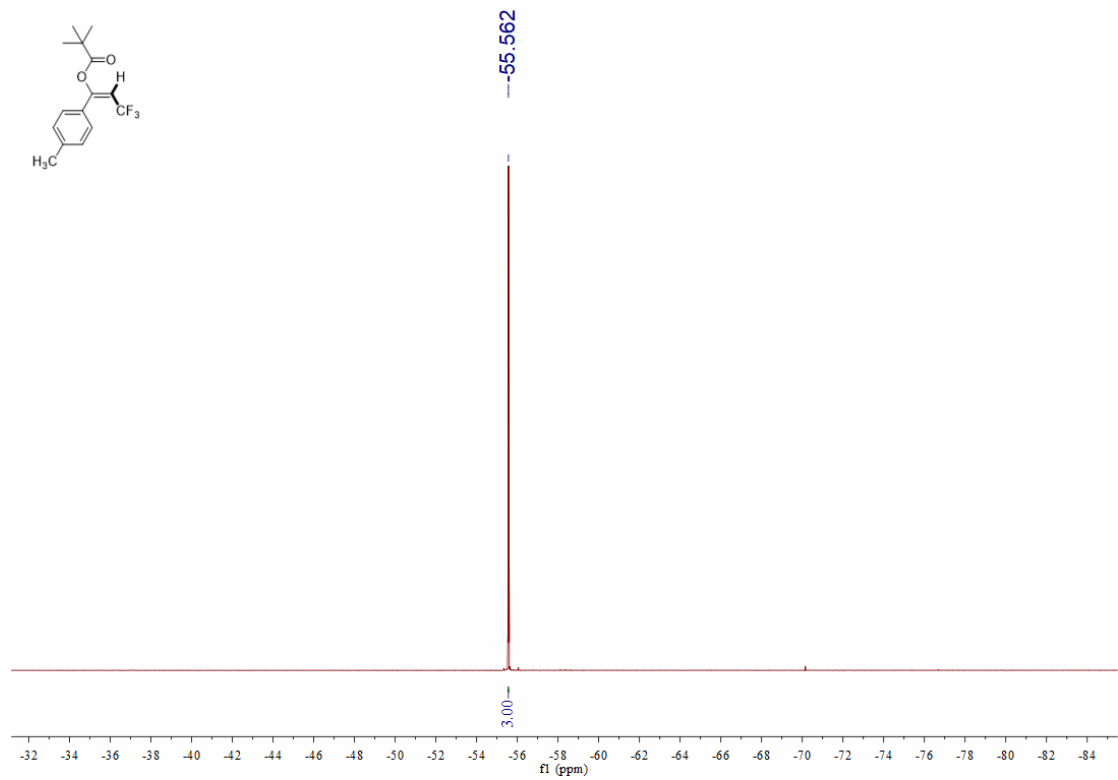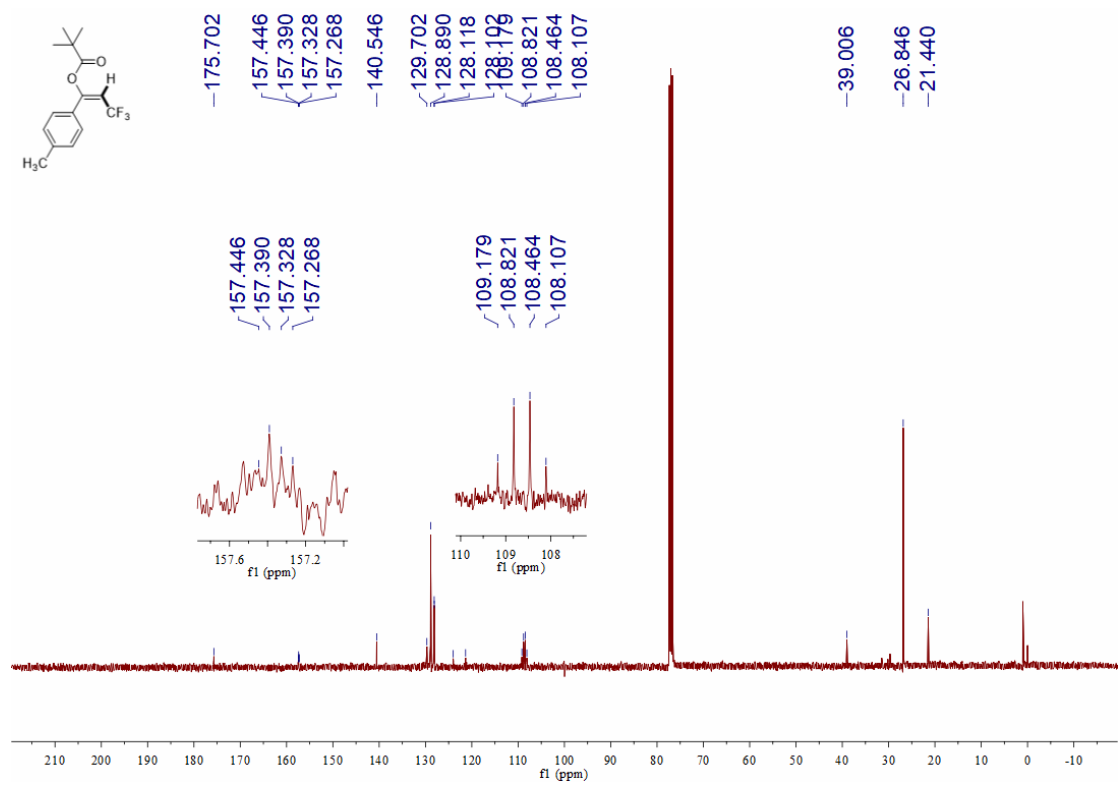

**(Z)-3,3,3-trifluoro-1-(4-methoxyphenyl)prop-1-en-1-yl pivalate (4n)** ( $^1\text{H}$  NMR 400 MHz,  $\text{CDCl}_3$ ;  $^{19}\text{F}$  NMR 376 MHz,  $\text{CDCl}_3$ ;  $^{13}\text{C}$  NMR 101 MHz,  $\text{CDCl}_3$ ).

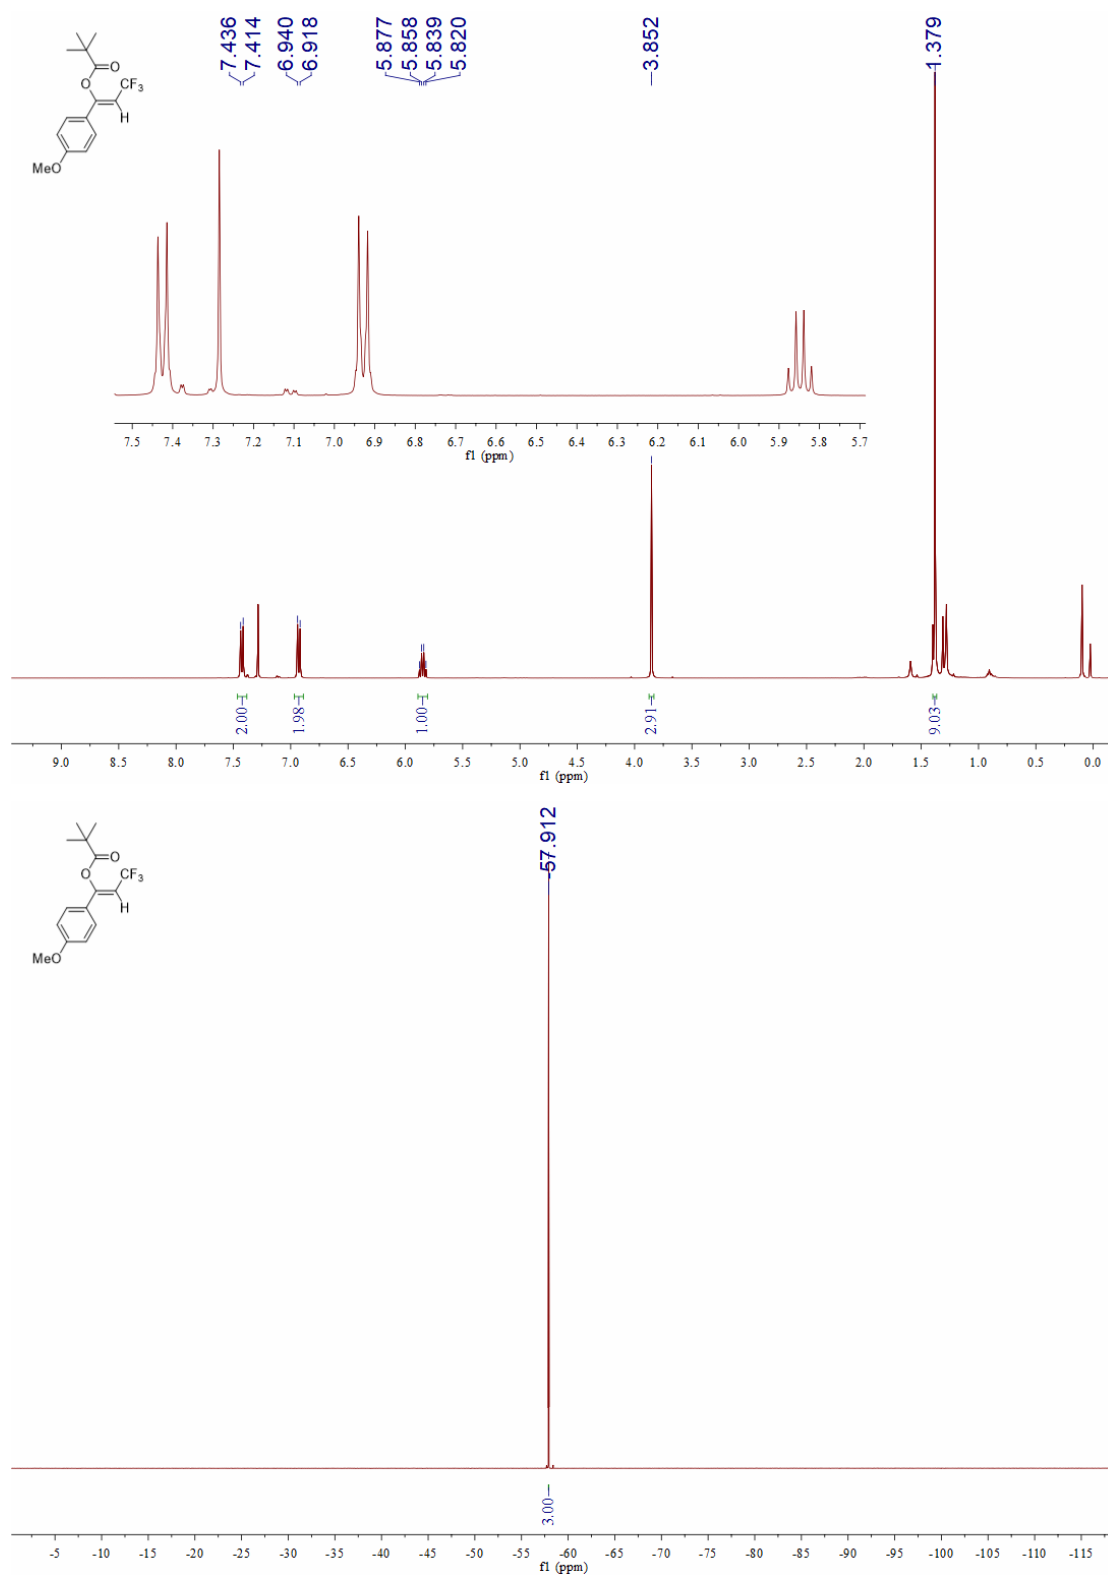

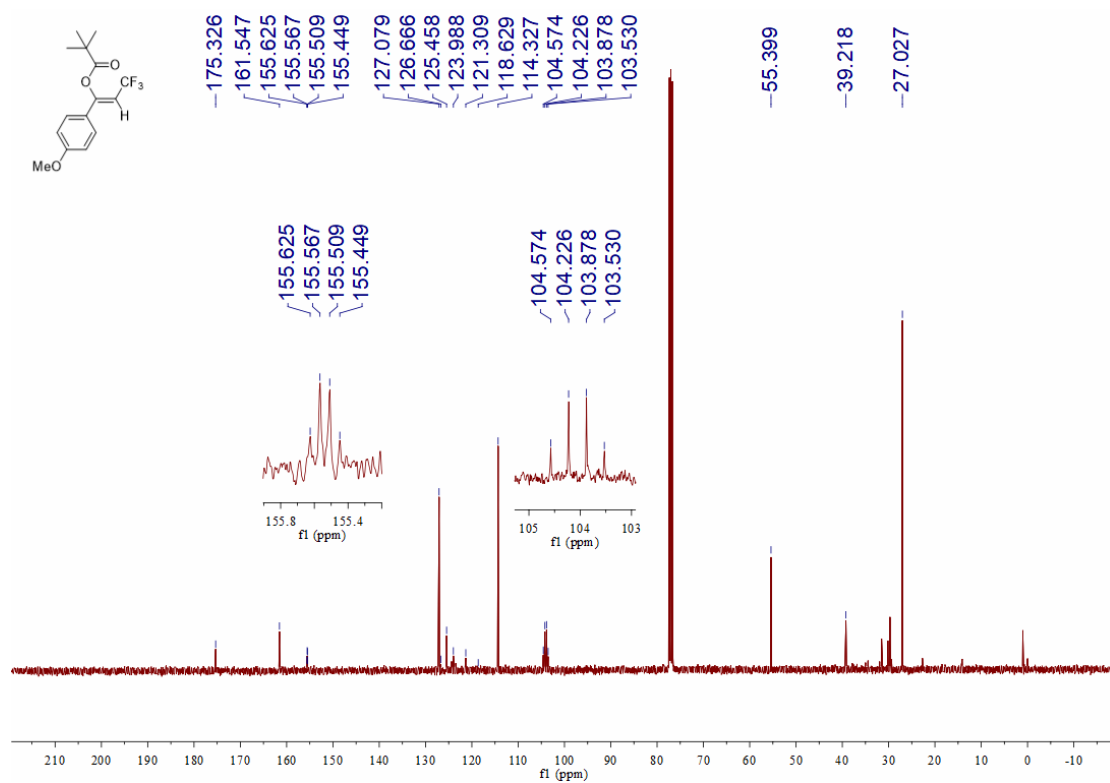

**(E)-3,3,3-trifluoro-1-(4-methoxyphenyl)prop-1-en-1-yl pivalate (4n')** ( $^1\text{H}$  NMR 400 MHz,  $\text{CDCl}_3$ ;  $^{19}\text{F}$  NMR 376 MHz,  $\text{CDCl}_3$ ;  $^{13}\text{C}$  NMR 101 MHz,  $\text{CDCl}_3$ ).

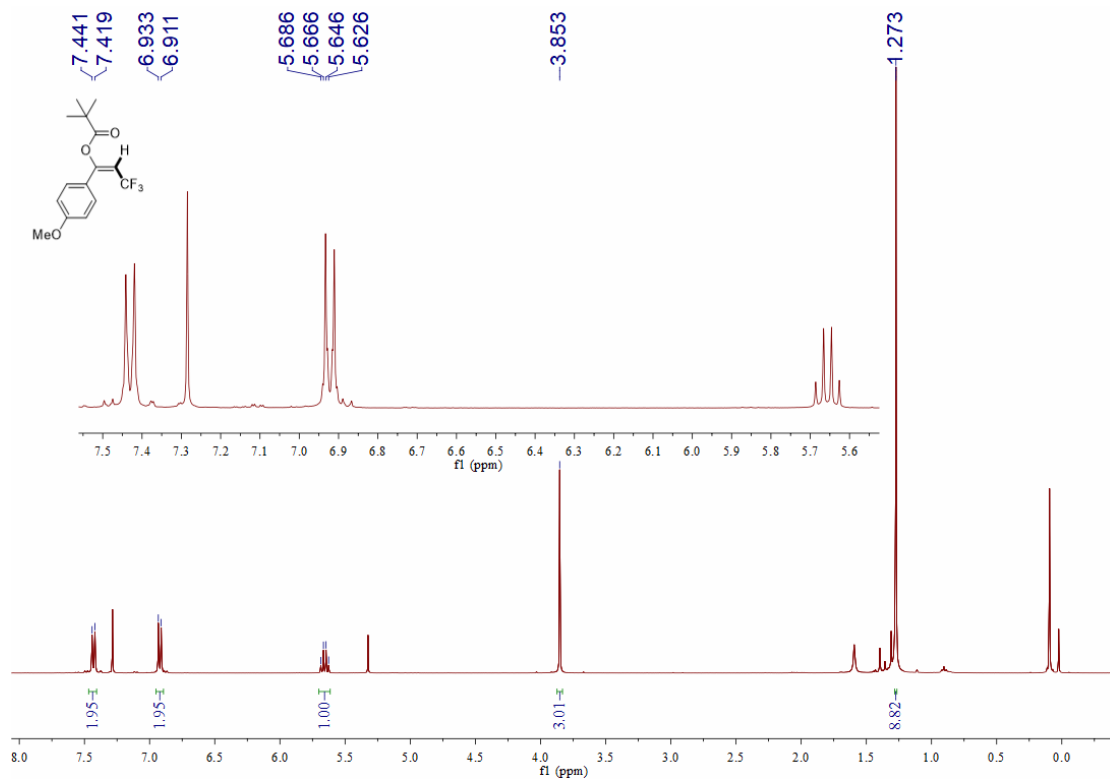

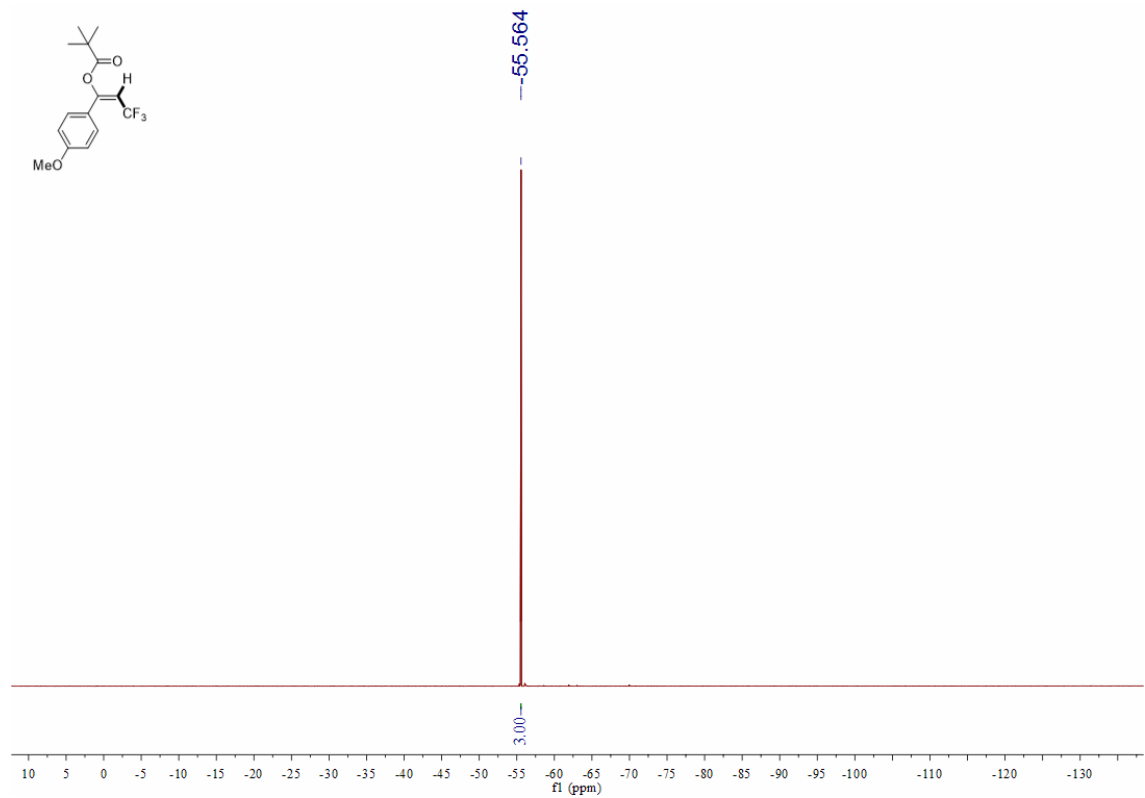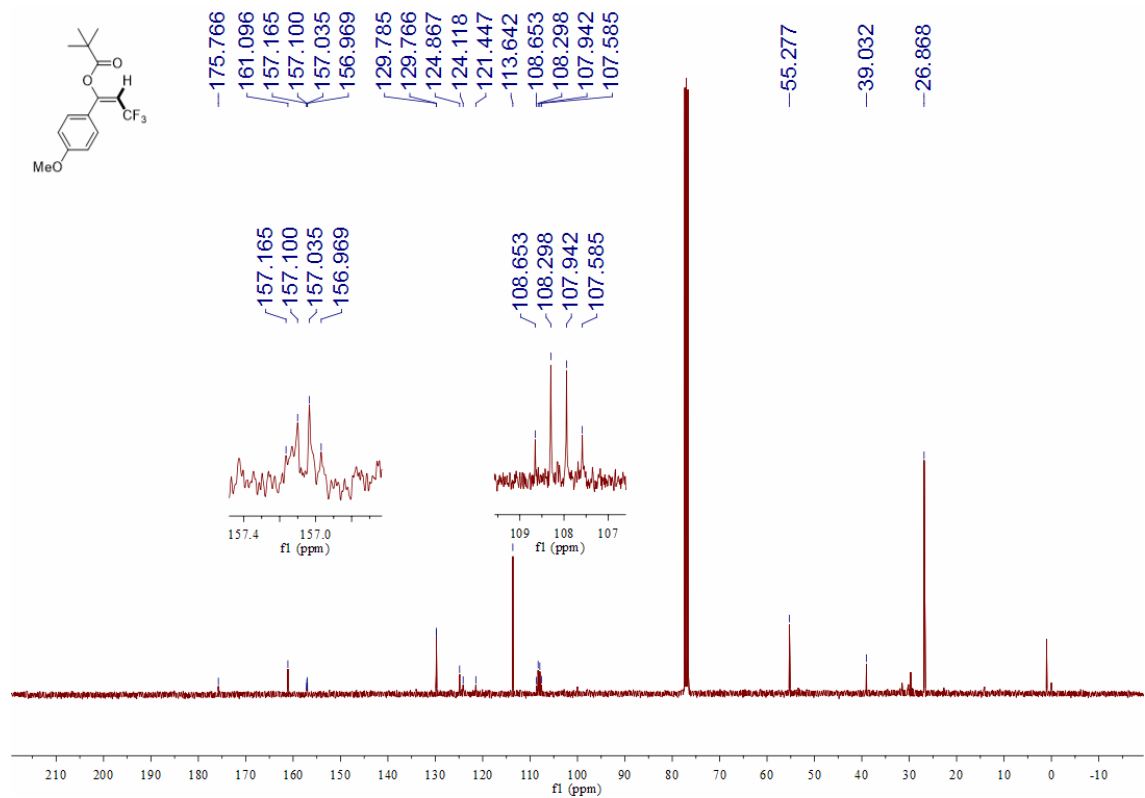

**(Z)-1-(4-chlorophenyl)-3,3,3-trifluoroprop-1-en-1-yl isobutyrate (4o)** ( $^1\text{H}$  NMR 400 MHz,  $\text{CDCl}_3$ ;  $^{19}\text{F}$  NMR 376 MHz,  $\text{CDCl}_3$ ;  $^{13}\text{C}$  NMR 101 MHz,  $\text{CDCl}_3$ ).

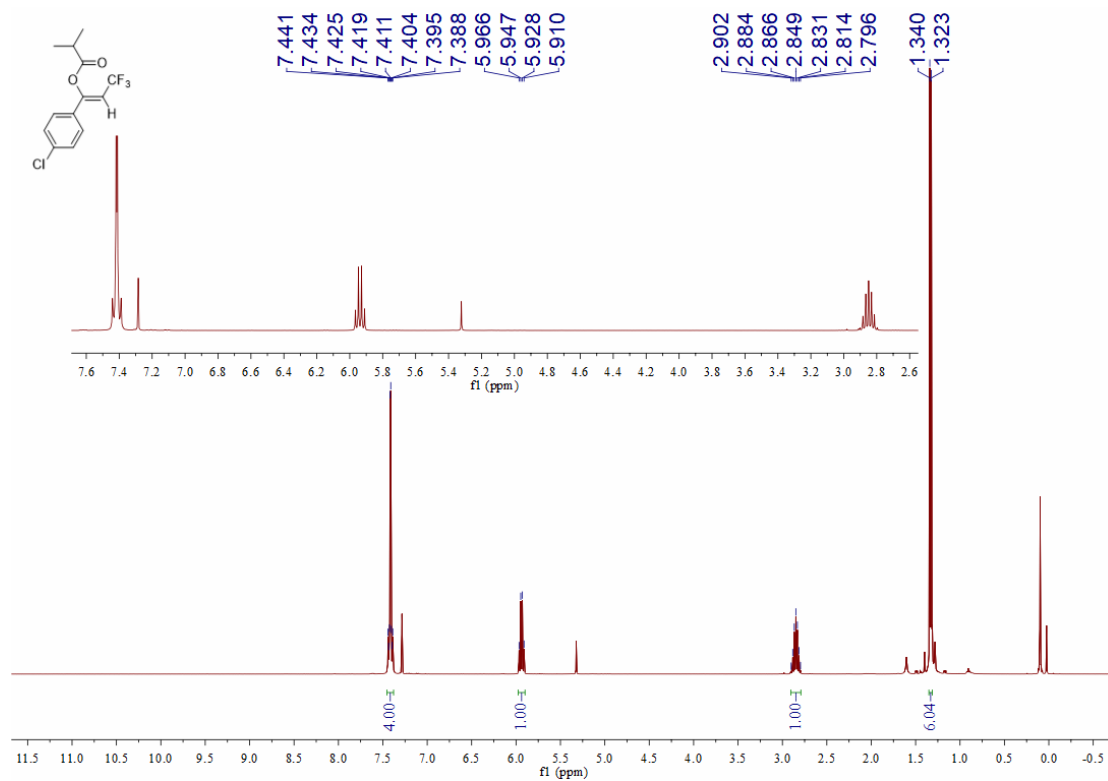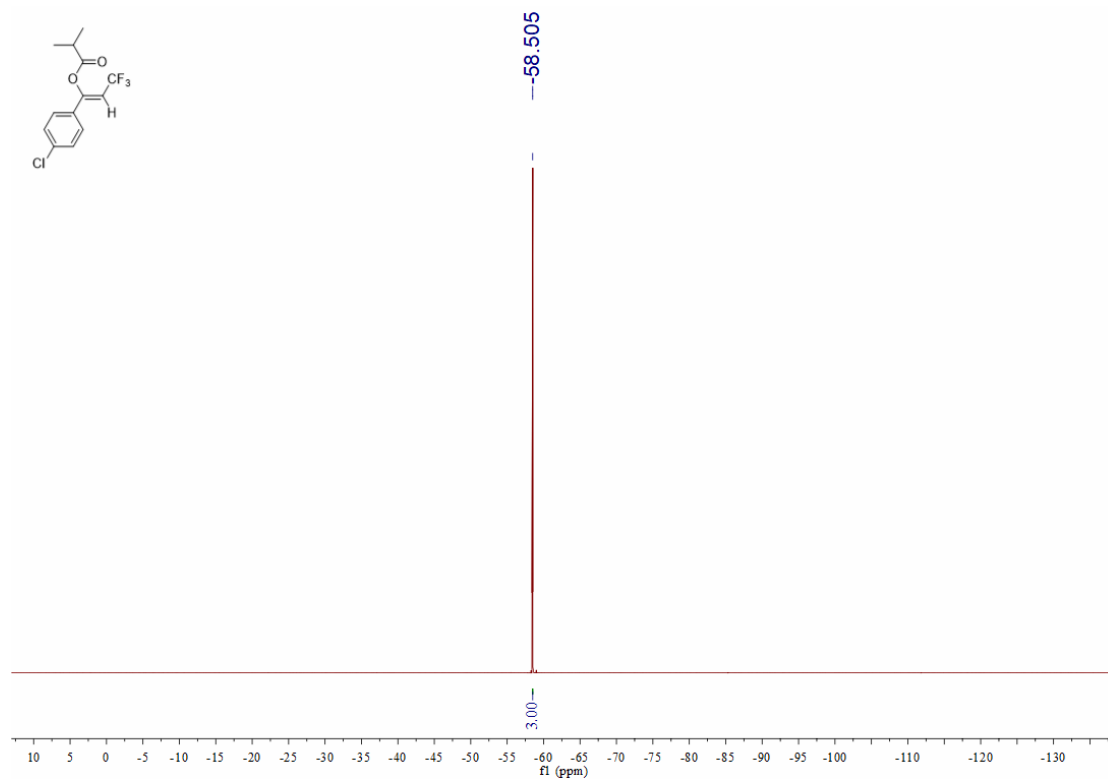



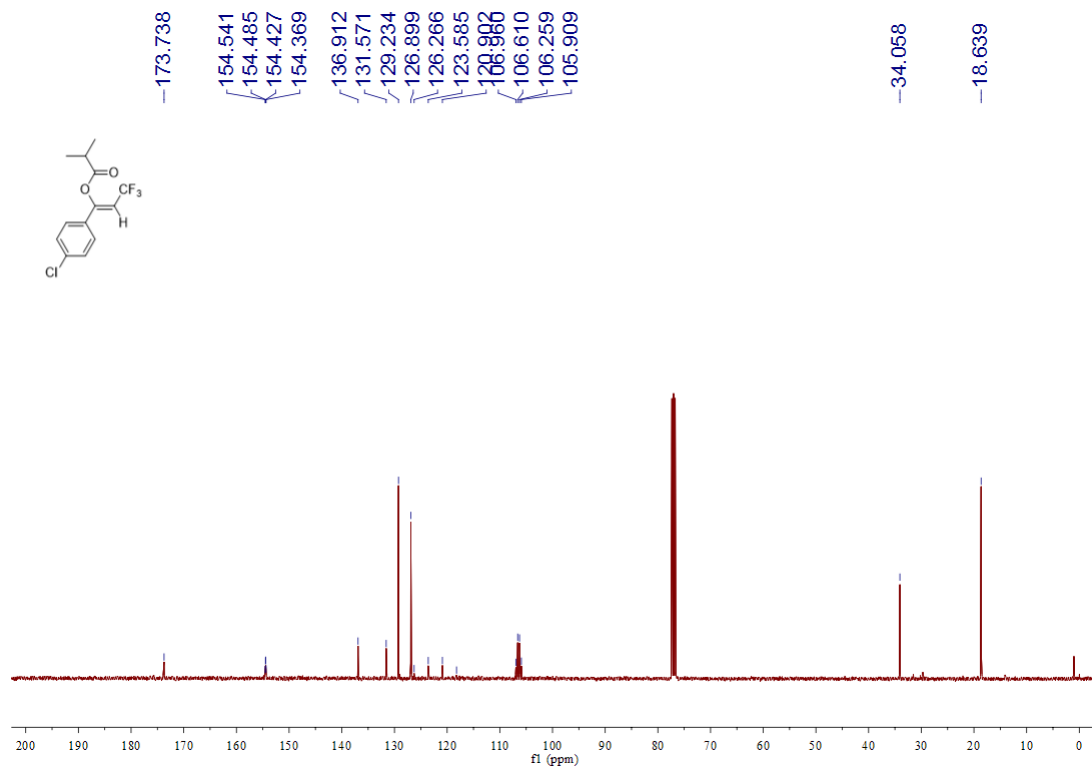

(Z)-1-(4-chlorophenyl)-3,3,3-trifluoroprop-1-en-1-yl pentanoate (4p) ( $^1\text{H}$  NMR 400 MHz,  $\text{CDCl}_3$ ;  $^{19}\text{F}$  NMR 376 MHz,  $\text{CDCl}_3$ ;  $^{13}\text{C}$  NMR 101 MHz,  $\text{CDCl}_3$ ).

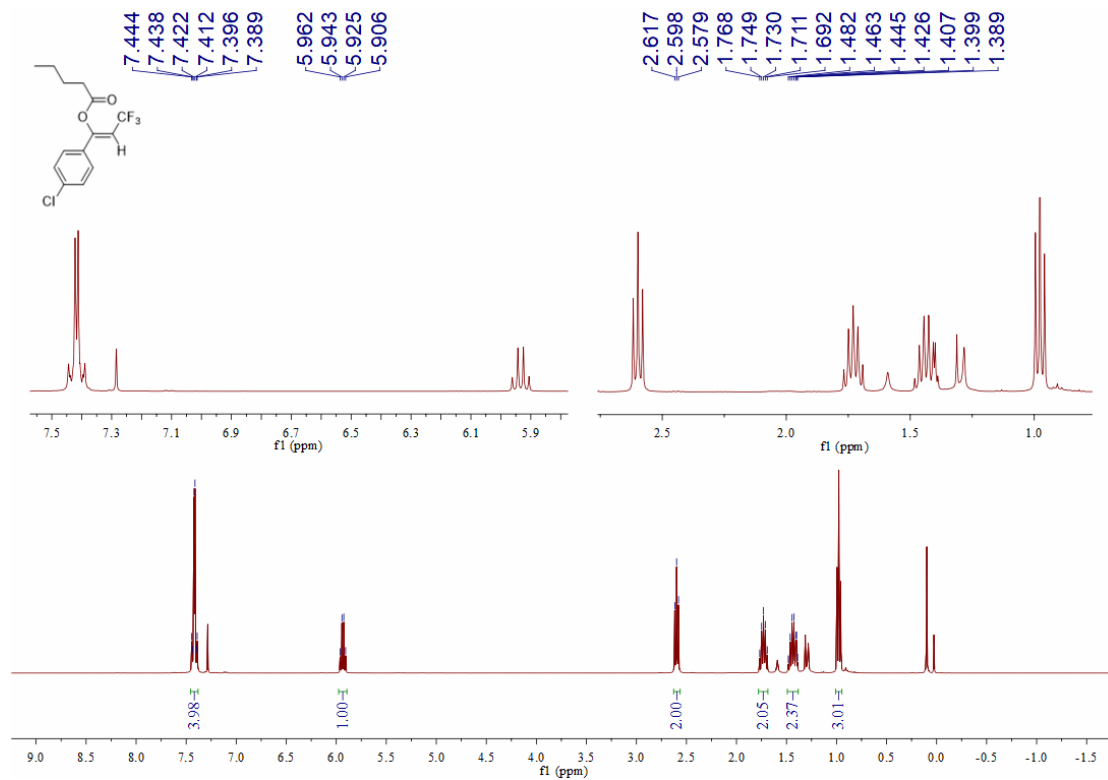

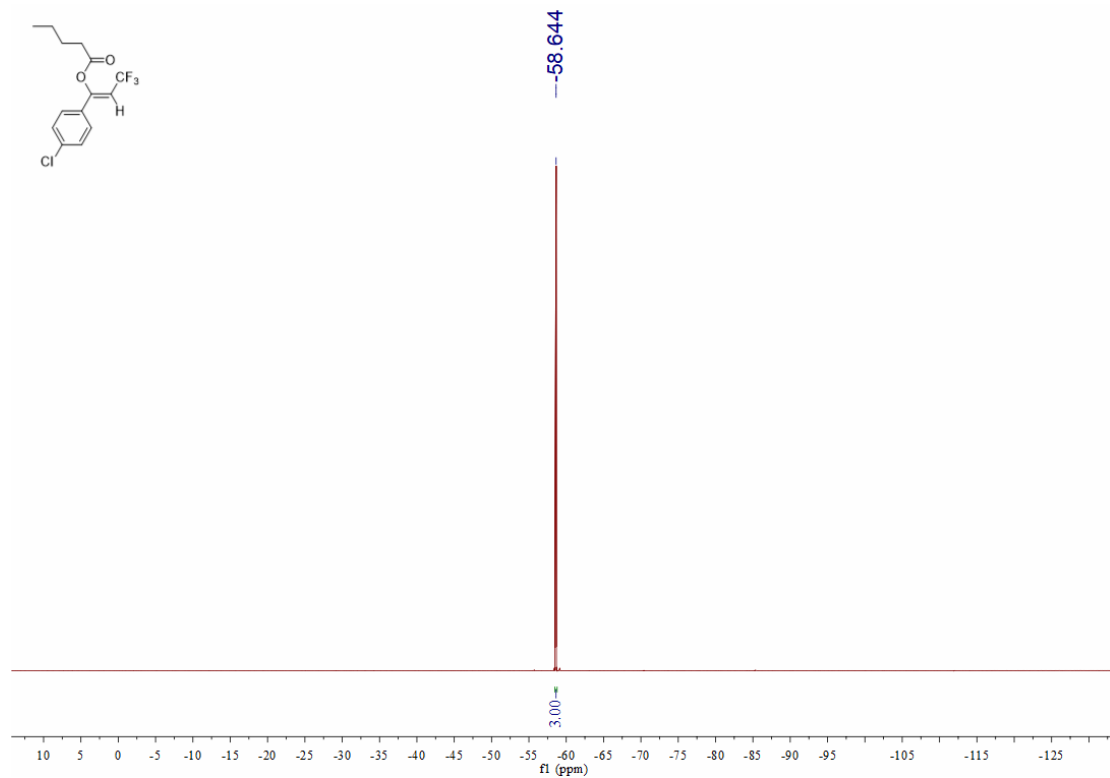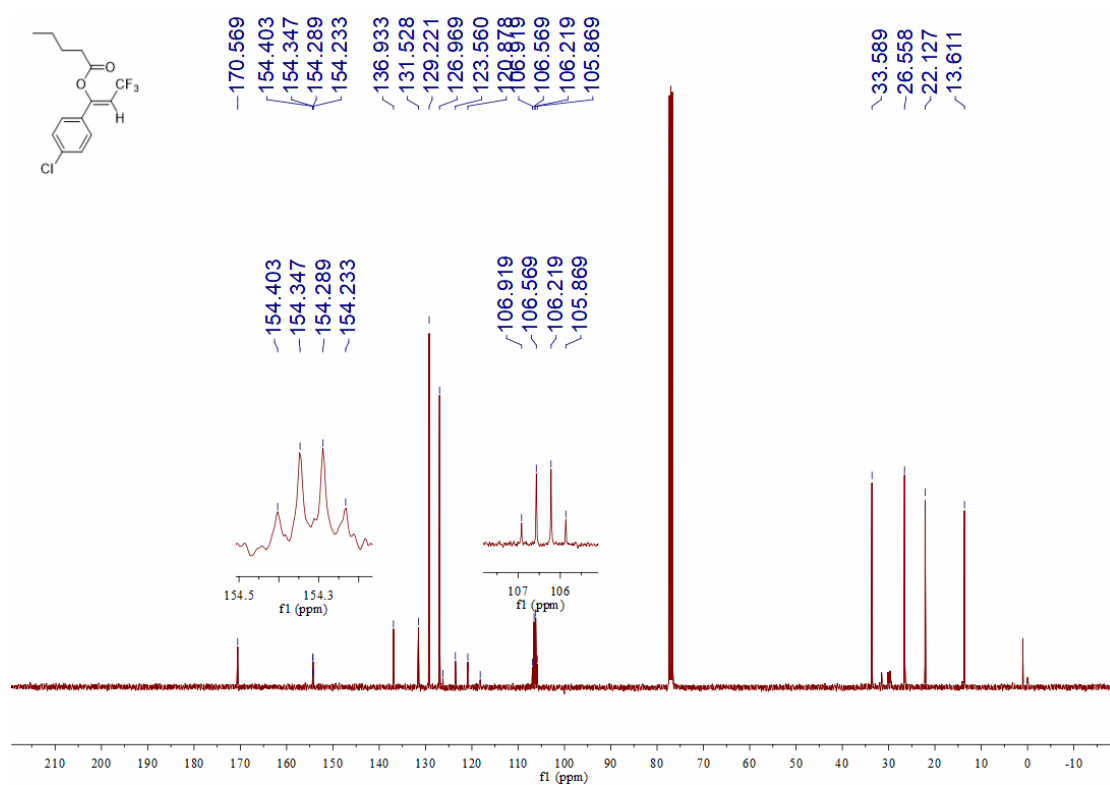

**(Z)-1-(4-chlorophenyl)-3,3,3-trifluoroprop-1-en-1-yl decanoate (4q)** ( $^1\text{H}$  NMR 400 MHz,  $\text{CDCl}_3$ ;  $^{19}\text{F}$  NMR 376 MHz,  $\text{CDCl}_3$ ;  $^{13}\text{C}$  NMR 101 MHz,  $\text{CDCl}_3$ ).

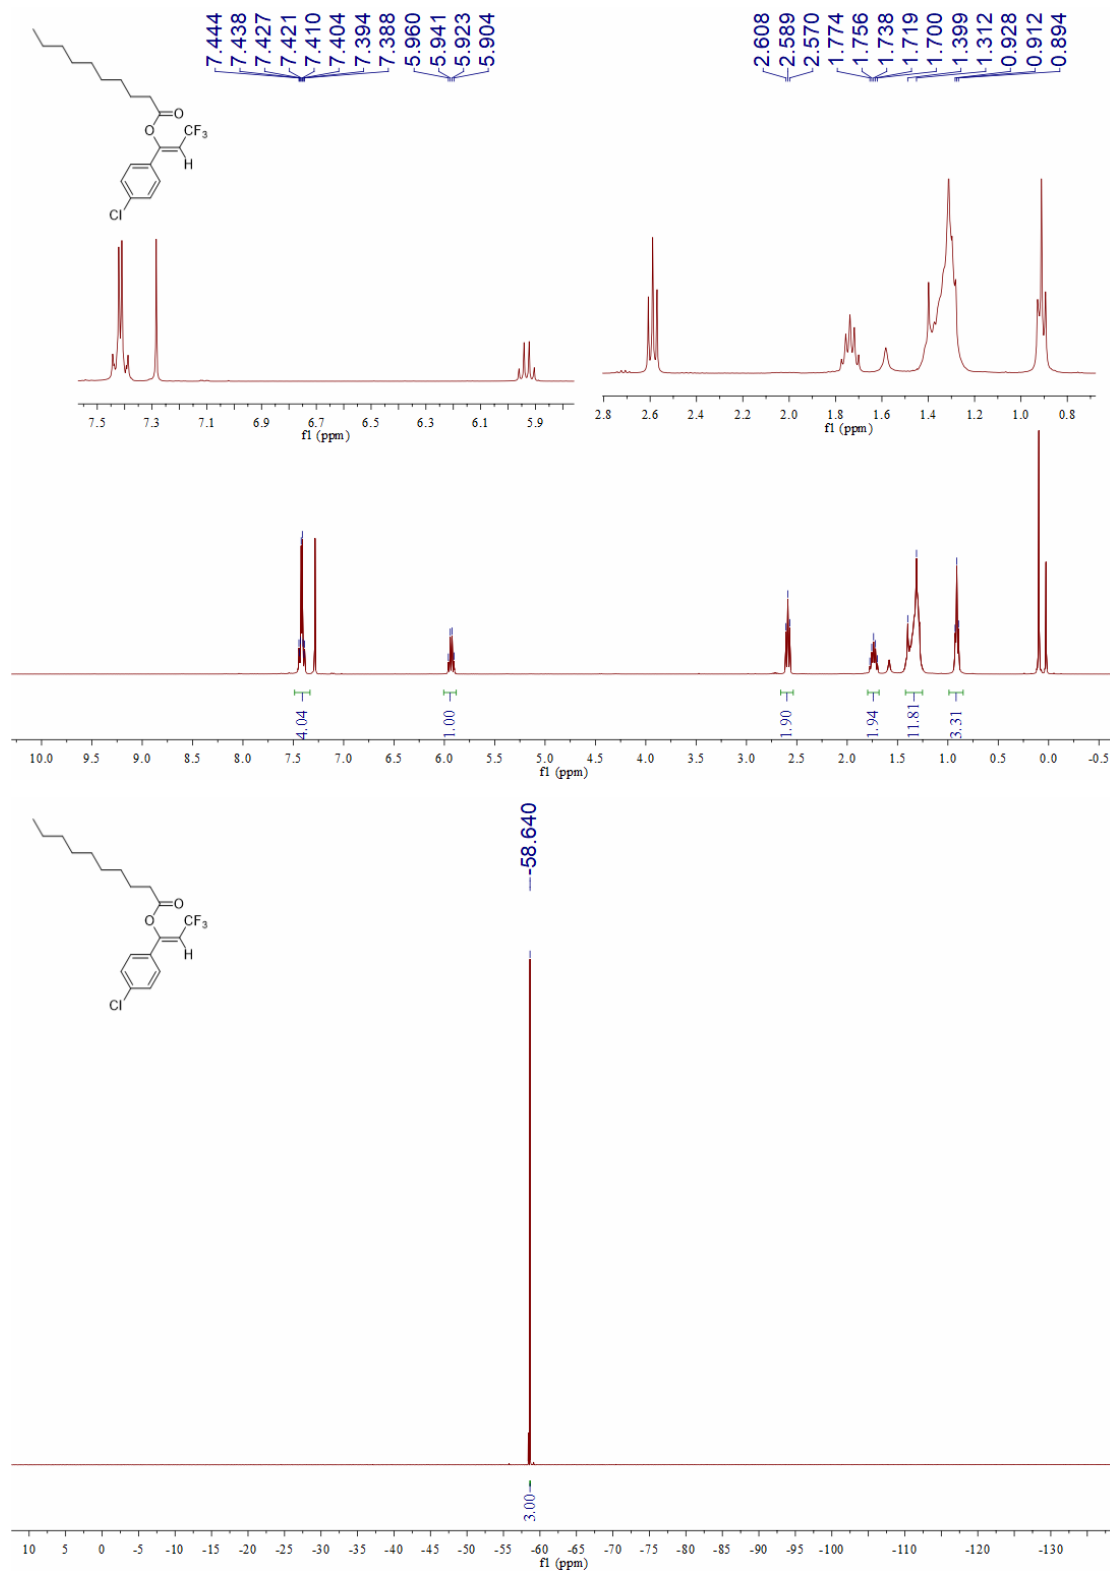

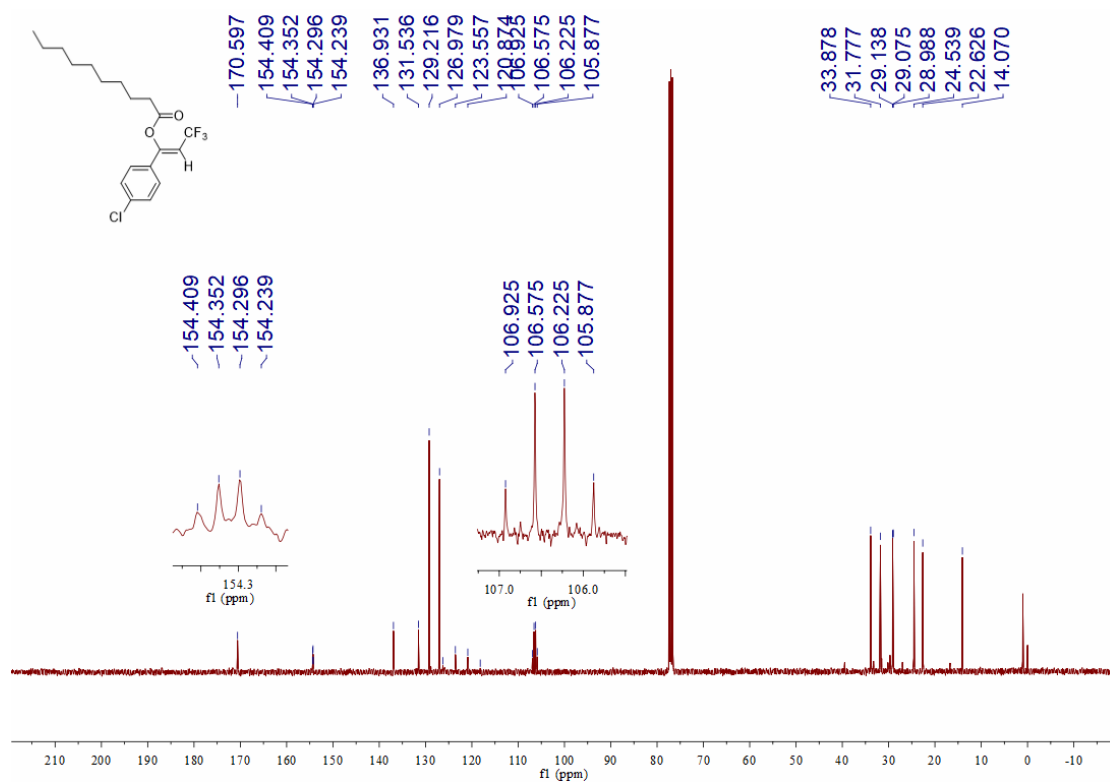

**(Z)-1-(4-chlorophenyl)-3,3,3-trifluoroprop-1-en-1-yl (1S,3s)-adamantane-1-carboxylate (4s)**  
 (<sup>1</sup>H NMR 400 MHz, CDCl<sub>3</sub>; <sup>19</sup>F NMR 376 MHz, CDCl<sub>3</sub>; <sup>13</sup>C NMR 101 MHz, CDCl<sub>3</sub>).

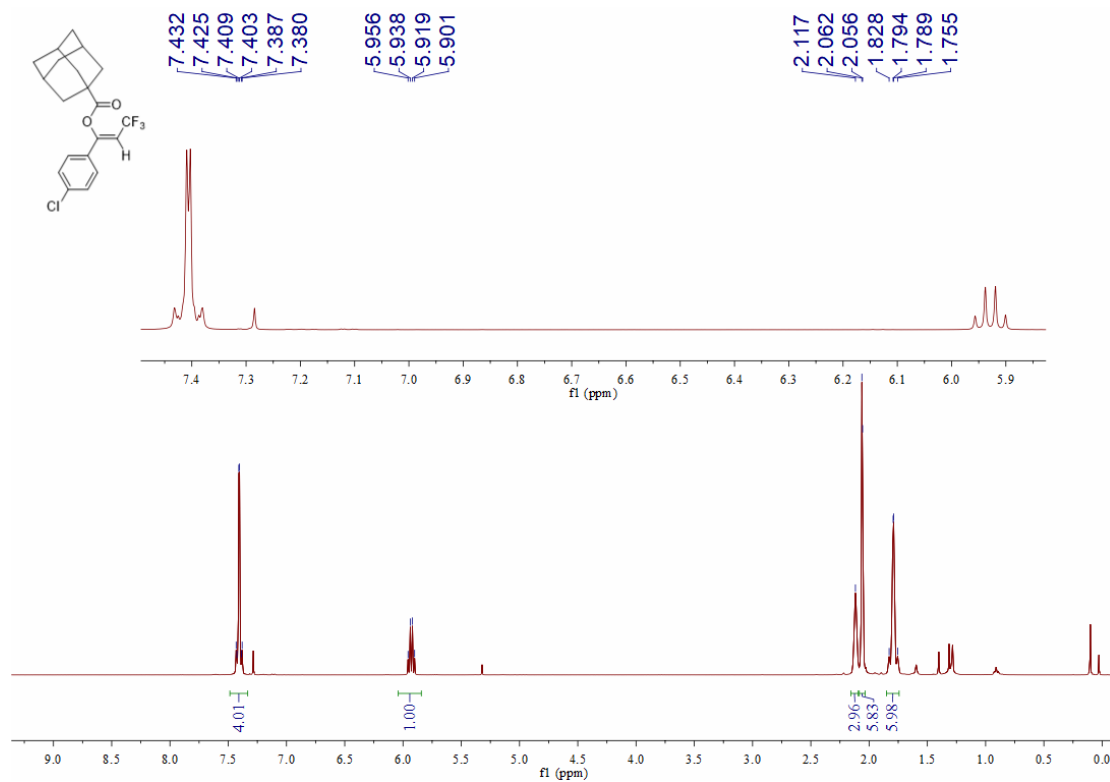

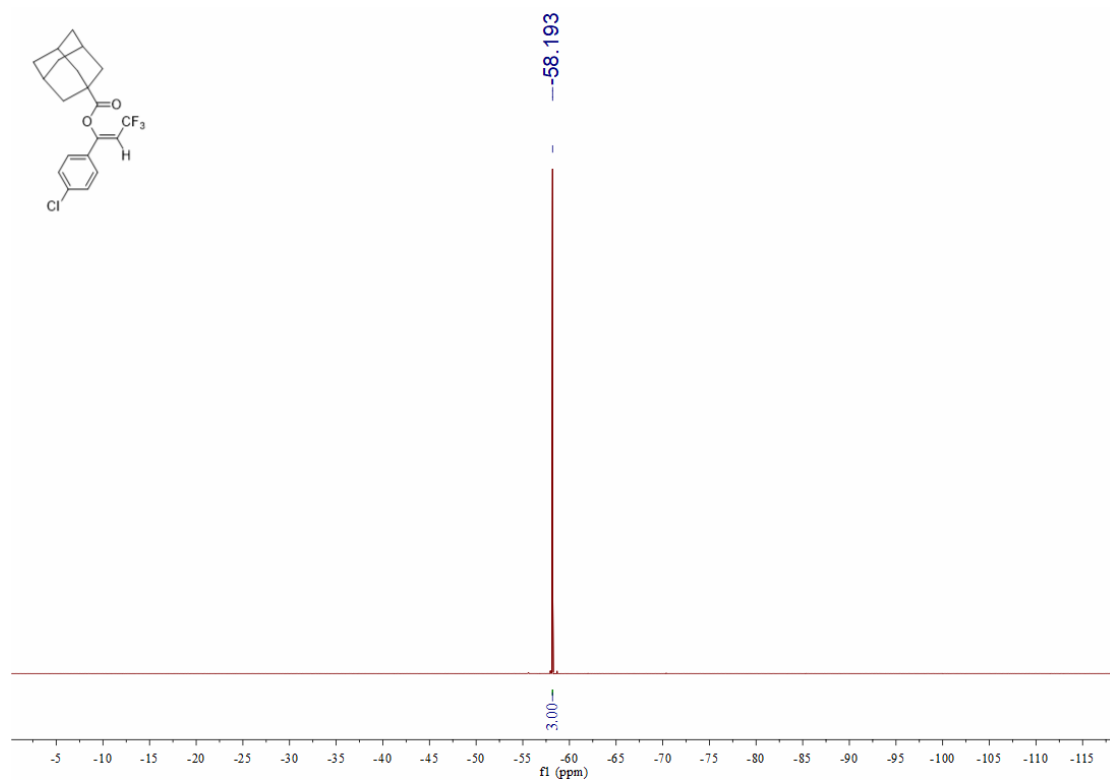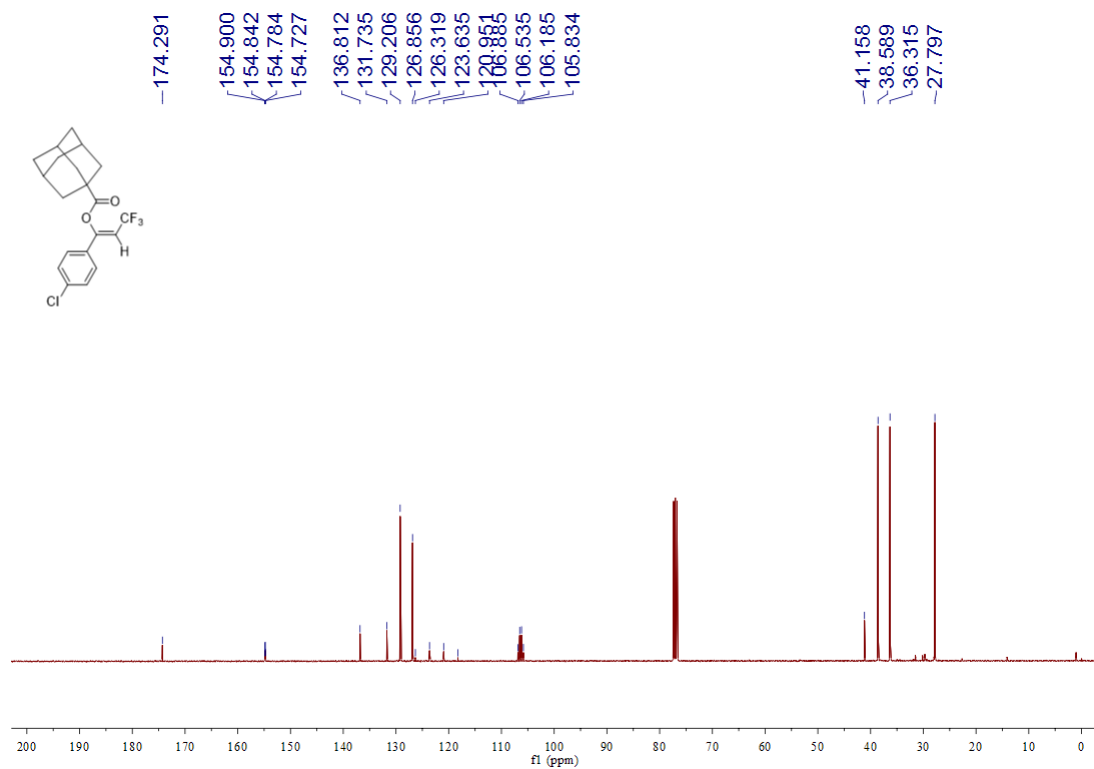

**(E)-1-(4-chlorophenyl)-3,3,3-trifluoroprop-1-en-1-yl adamantane-1-carboxylate (4s')** ( $^1\text{H}$  NMR 400 MHz,  $\text{CDCl}_3$ ;  $^{19}\text{F}$  NMR 376 MHz,  $\text{CDCl}_3$ ;  $^{13}\text{C}$  NMR 101 MHz,  $\text{CDCl}_3$ ).

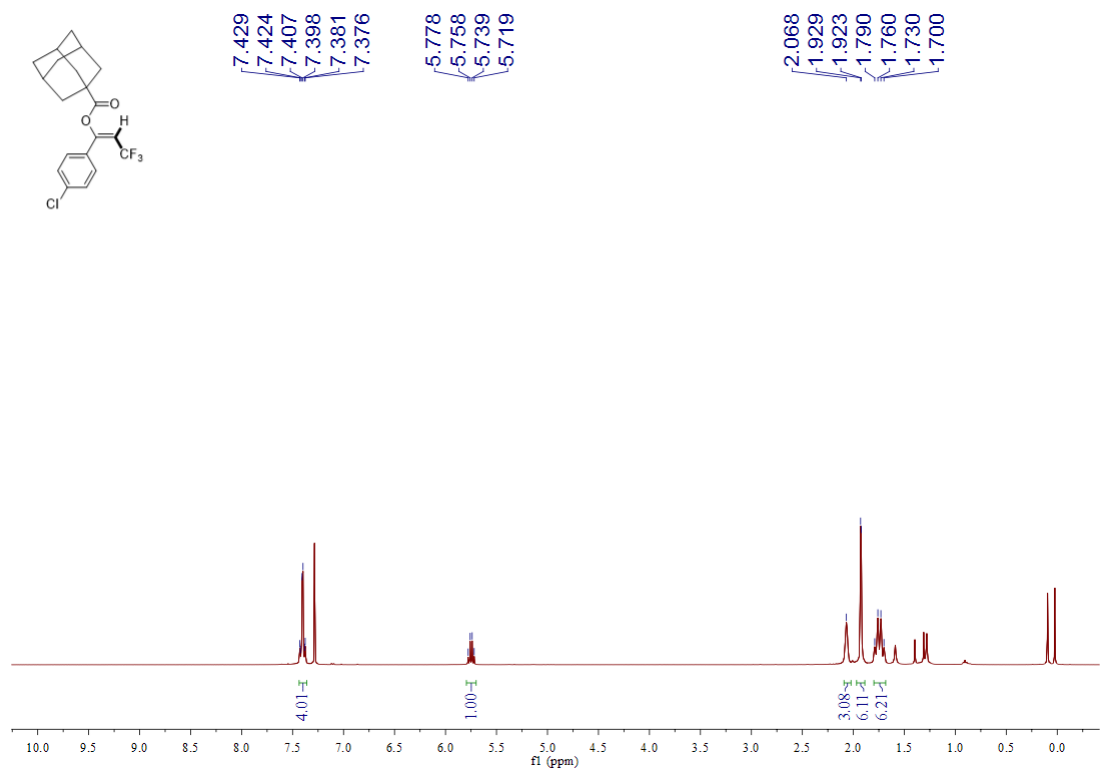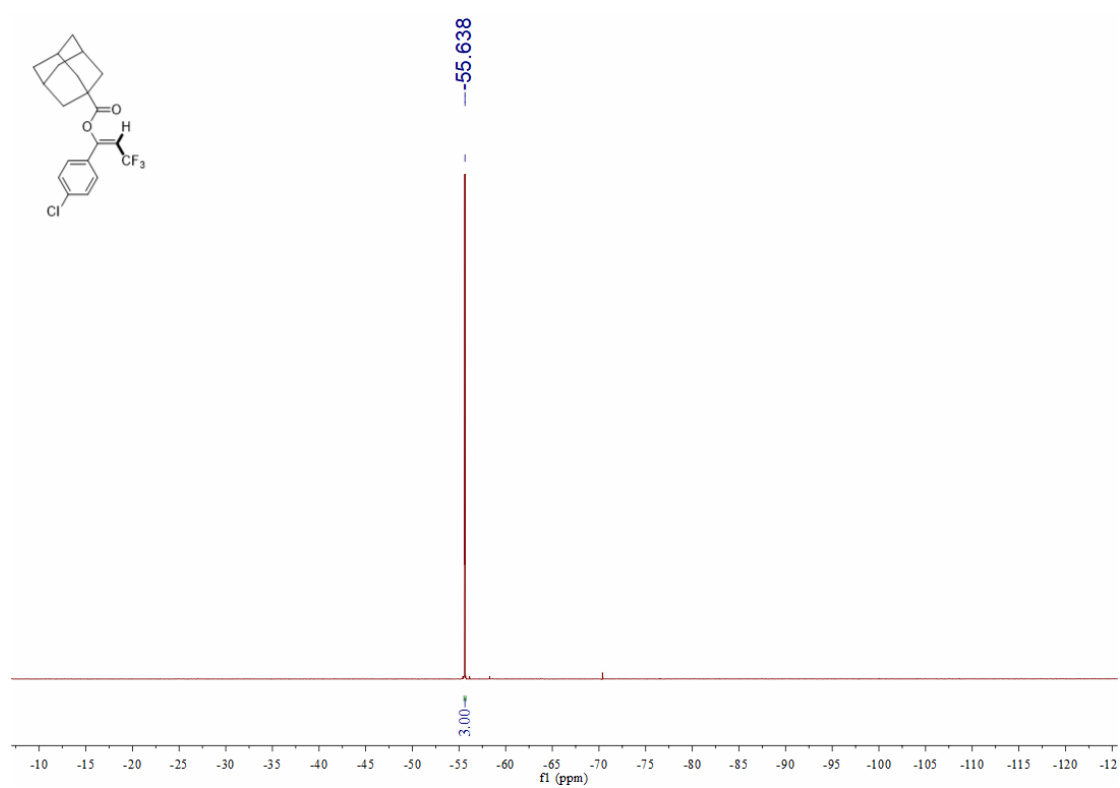

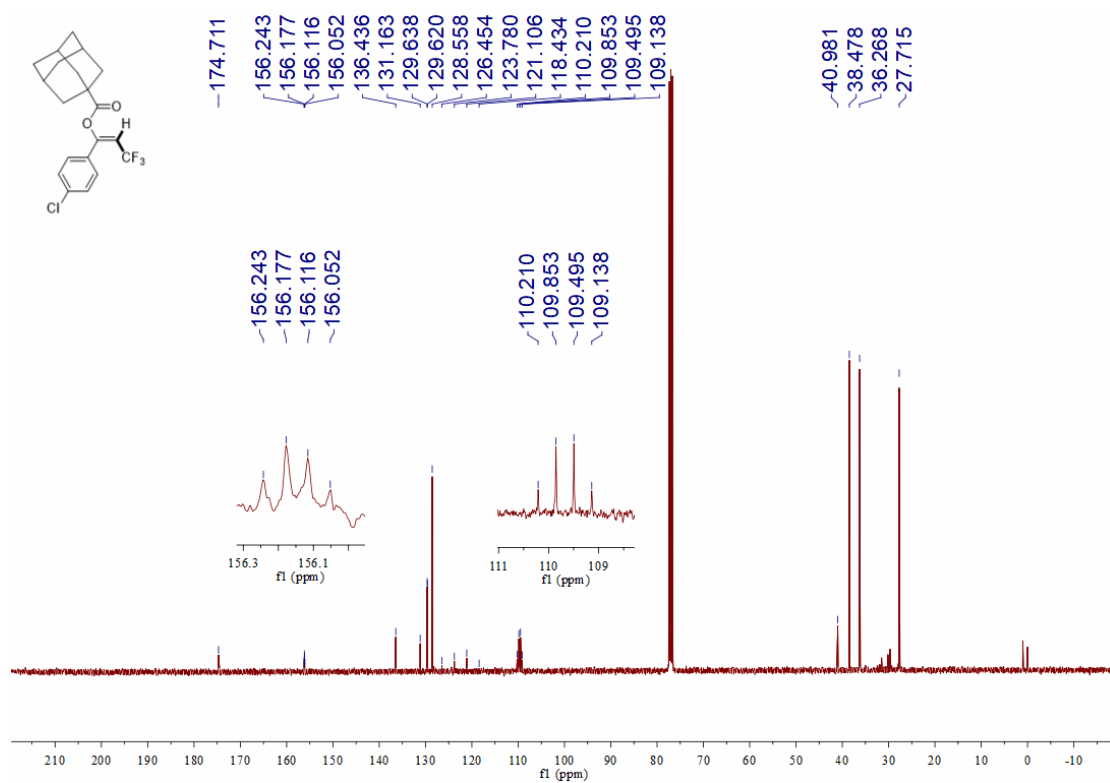

**(Z)-1-(4-chlorophenyl)-3,3,3-trifluoroprop-1-en-1-yl cyclopentanecarboxylate (4t)** (<sup>1</sup>H NMR 400 MHz, CDCl<sub>3</sub>; <sup>19</sup>F NMR 376 MHz, CDCl<sub>3</sub>; <sup>13</sup>C NMR 101 MHz, CDCl<sub>3</sub>).

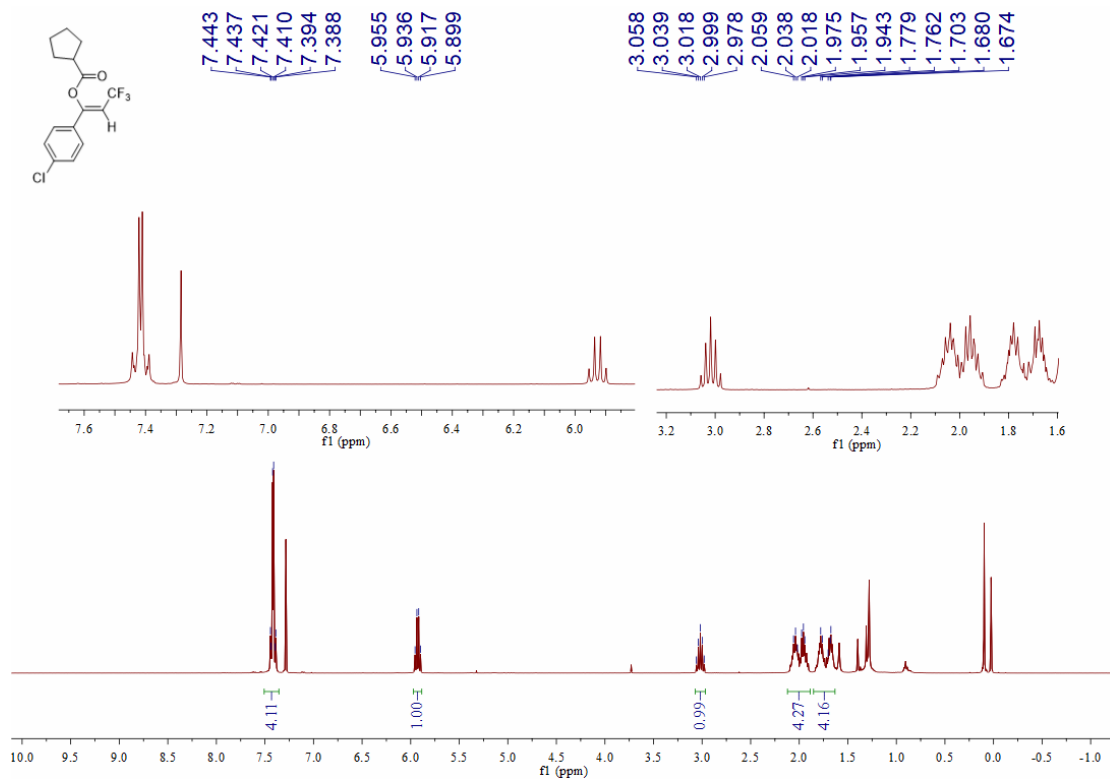

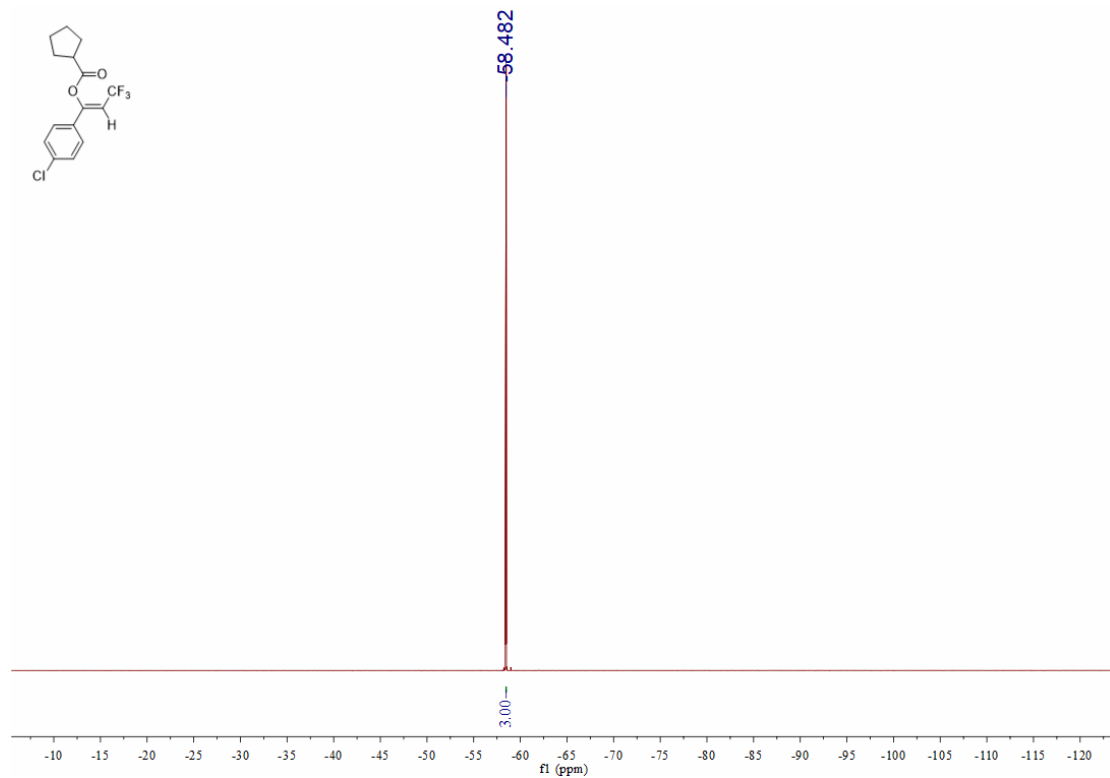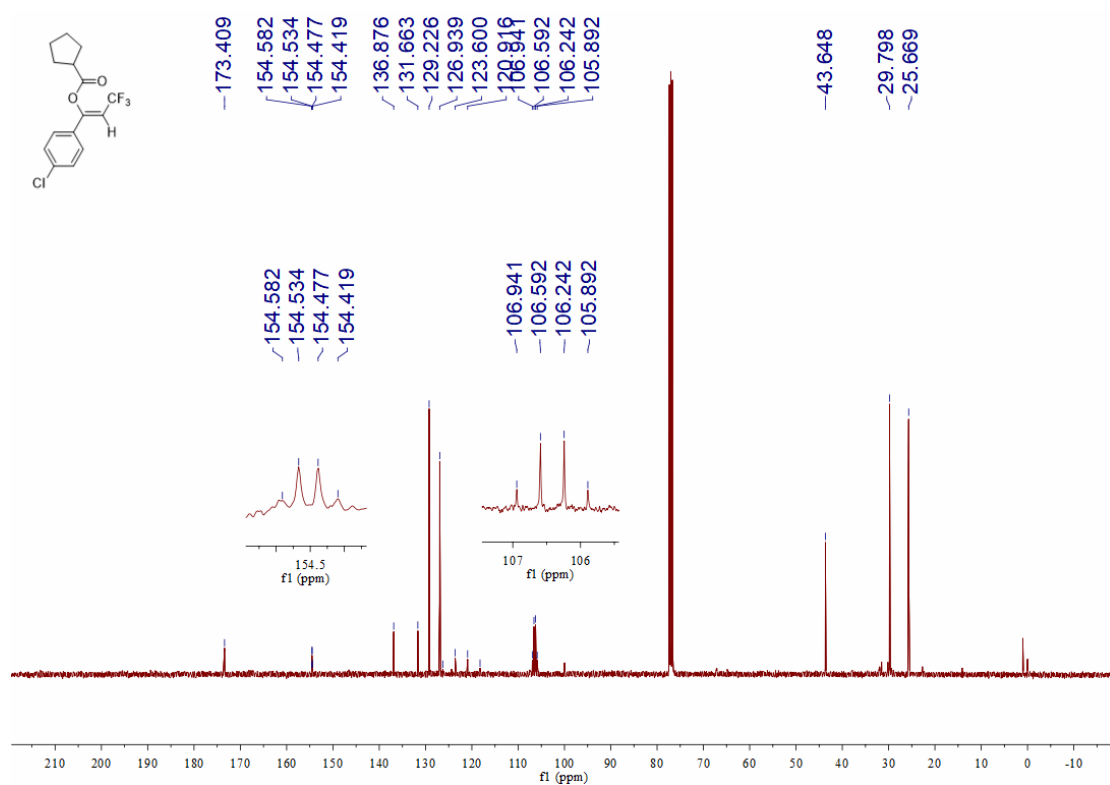



**(Z)-1-(4-chlorophenyl)-3,3,3-trifluoroprop-1-en-1-yl 2-methyl-2-phenylpropanoate (4u)**

(<sup>1</sup>H NMR 400 MHz, CDCl<sub>3</sub>; <sup>19</sup>F NMR 376 MHz, CDCl<sub>3</sub>; <sup>13</sup>C NMR 101 MHz, CDCl<sub>3</sub>).

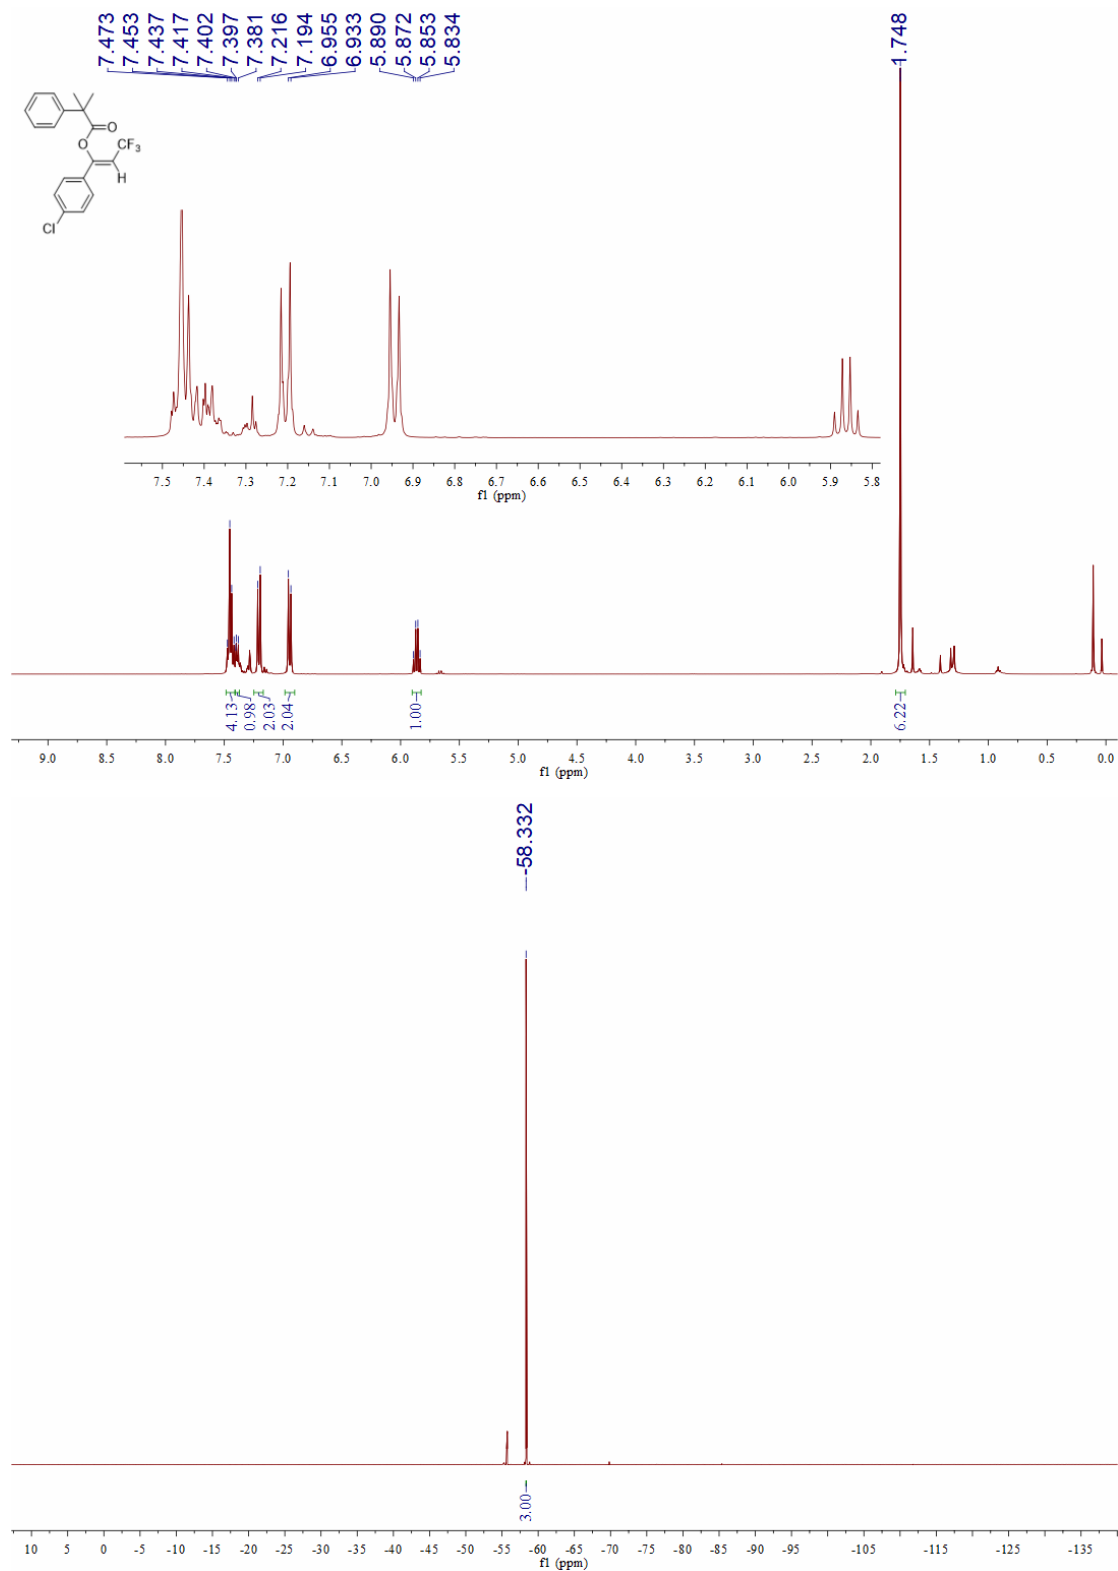

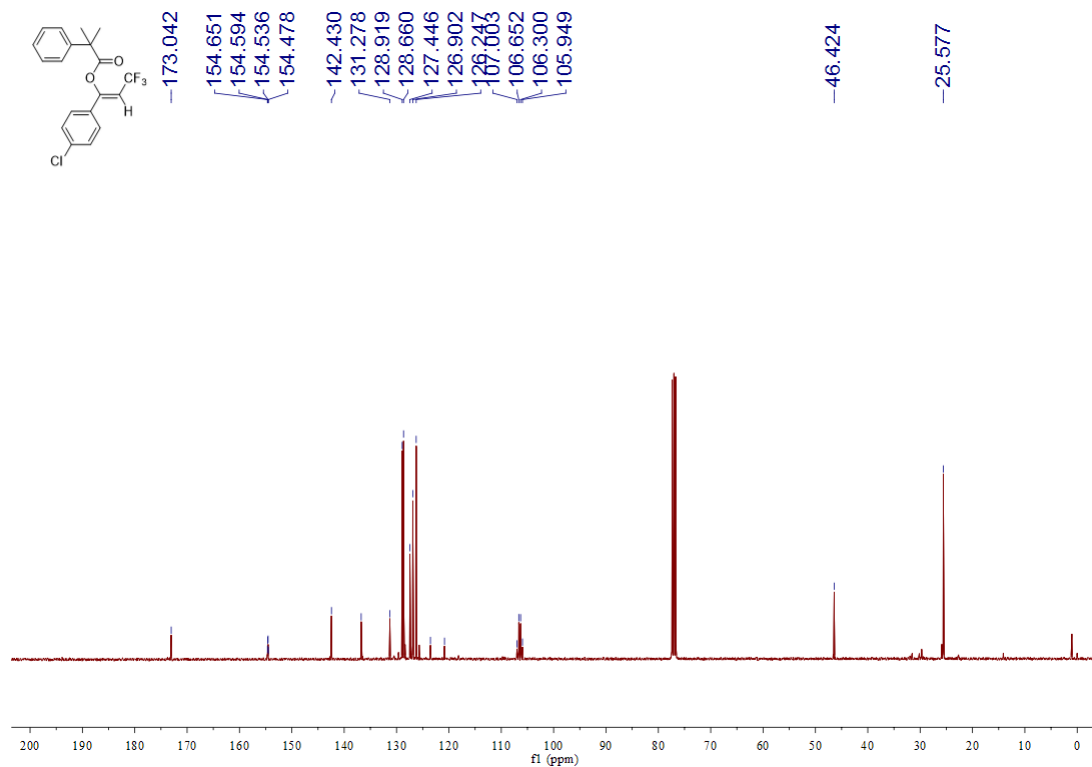

**(Z)-3,3,3-trifluoro-1-(3-fluorophenyl)prop-1-en-1-yl 2-methyl-2-phenylpropanoate (4v, X = F)**  
 (<sup>1</sup>H NMR 400 MHz, CDCl<sub>3</sub>; <sup>19</sup>F NMR 376 MHz, CDCl<sub>3</sub>; <sup>13</sup>C NMR 101 MHz, CDCl<sub>3</sub>).

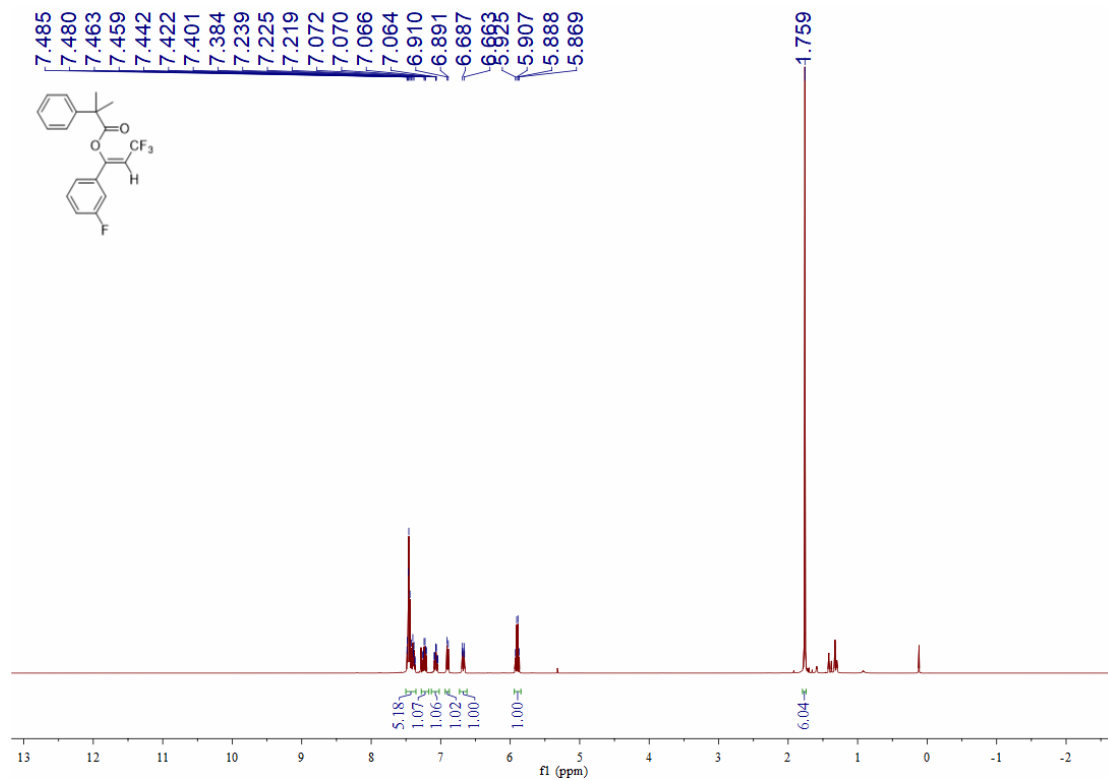

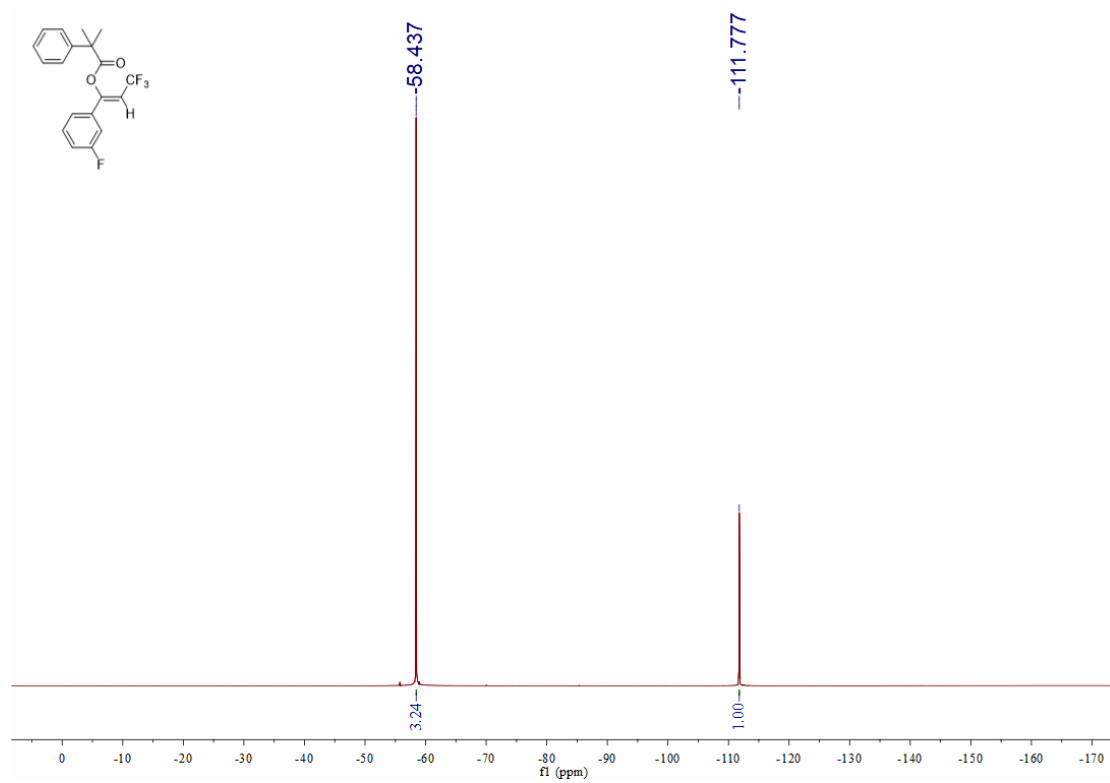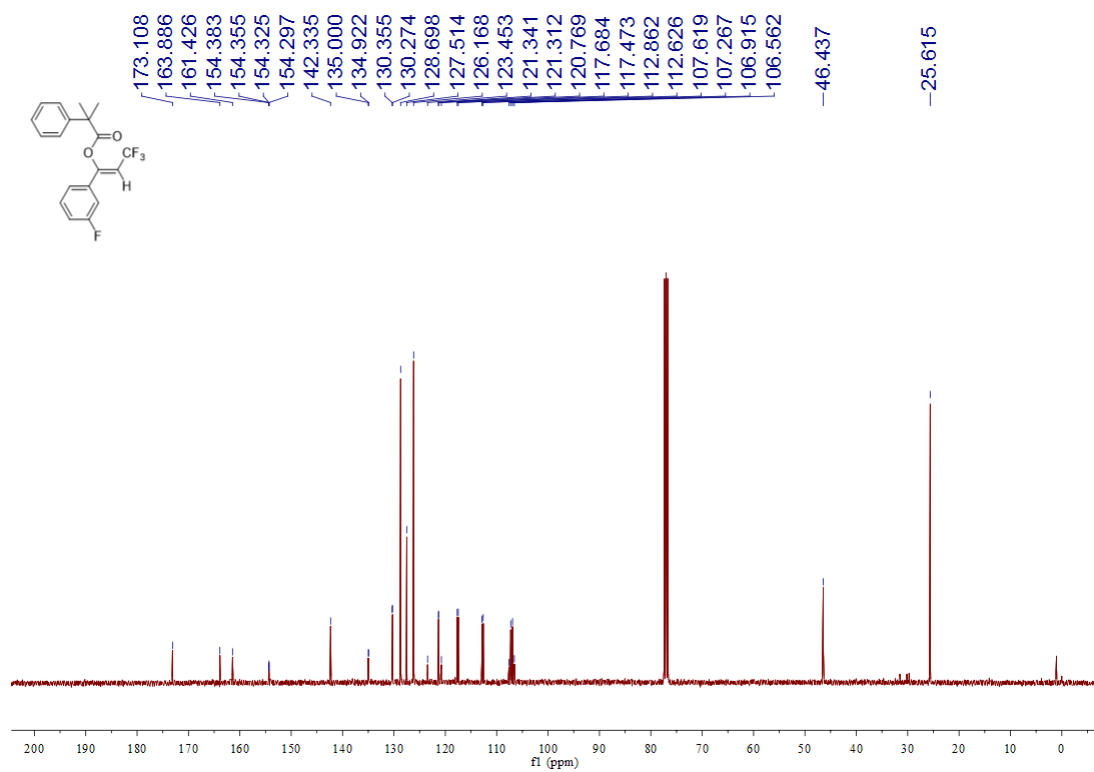

**(Z)-1-(3-chlorophenyl)-3,3,3-trifluoroprop-1-en-1-yl 2-methyl-2-phenylpropanoate (4v, X = Cl)** ( $^1\text{H}$  NMR 400 MHz,  $\text{CDCl}_3$ ;  $^{19}\text{F}$  NMR 376 MHz,  $\text{CDCl}_3$ ;  $^{13}\text{C}$  NMR 101 MHz,  $\text{CDCl}_3$ ).

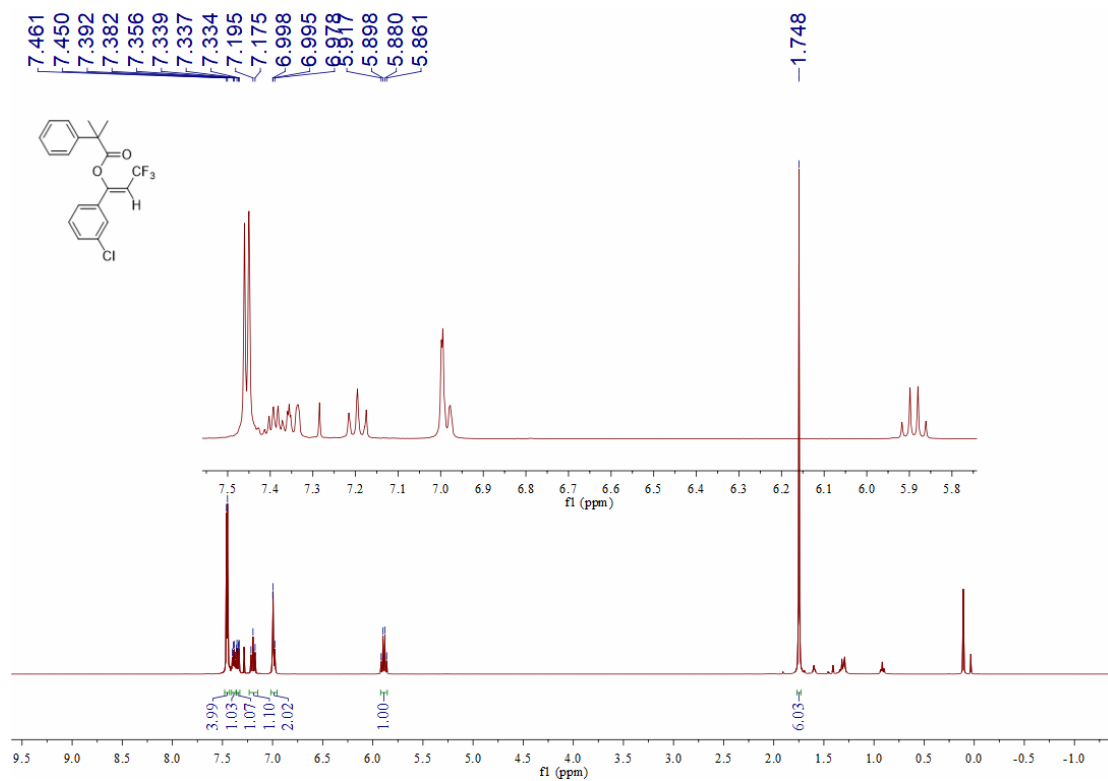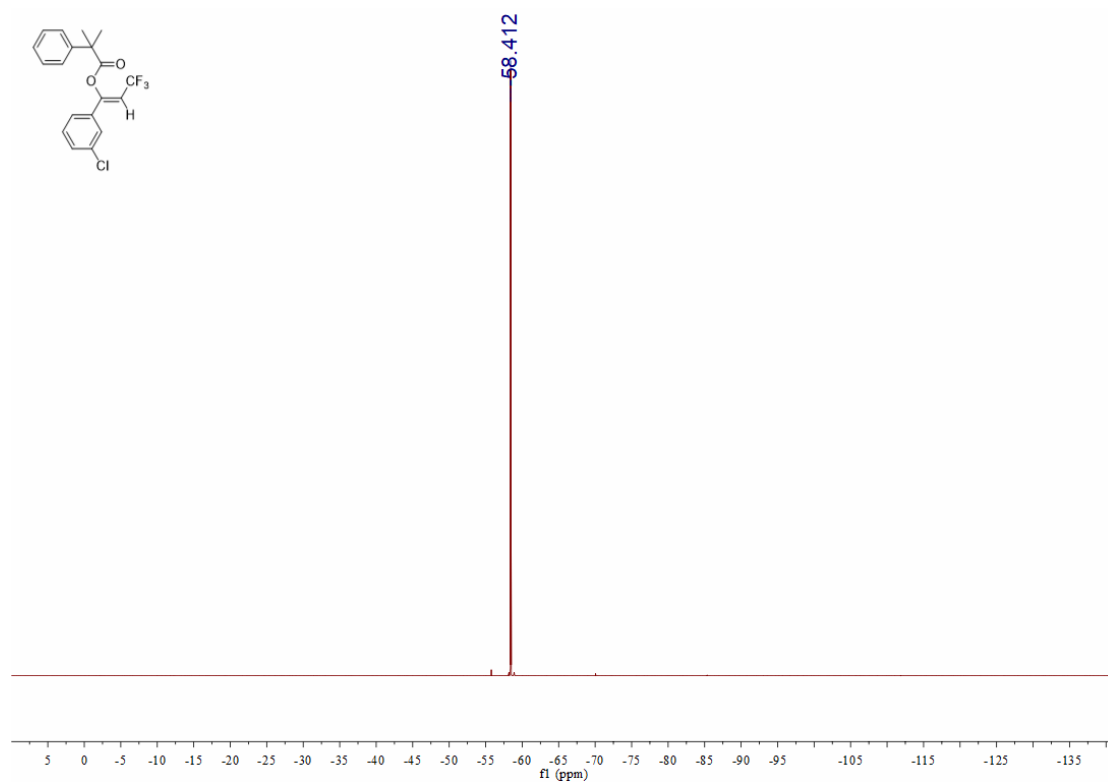

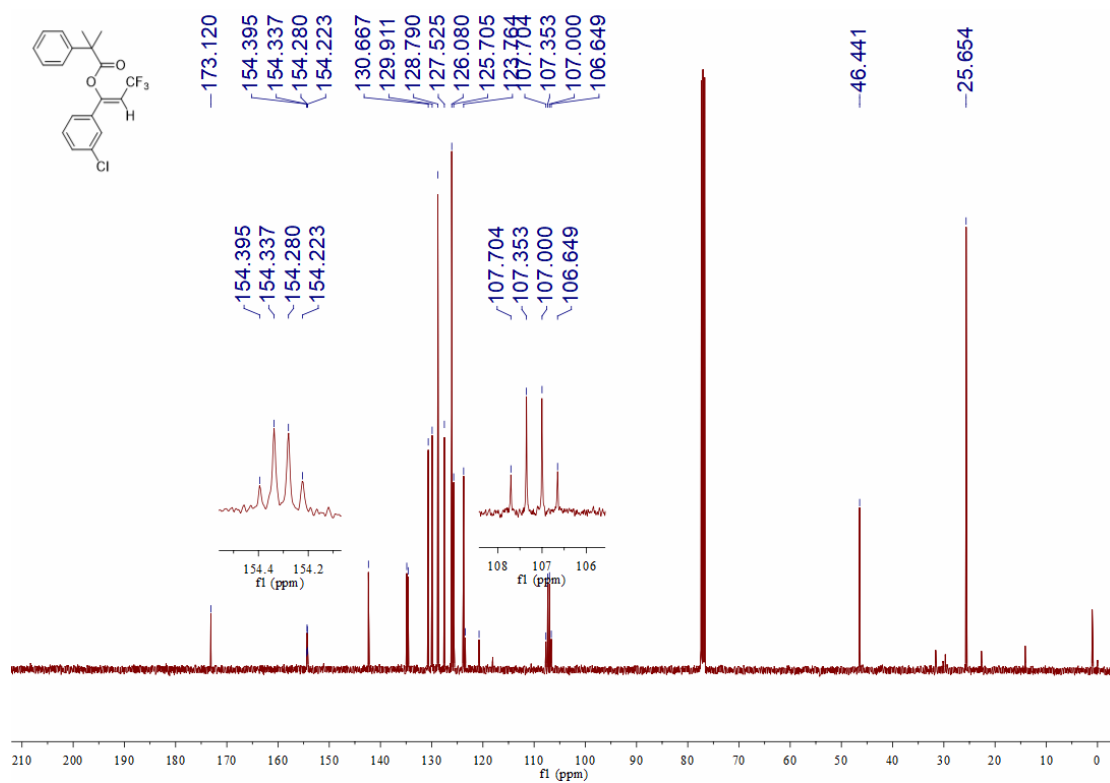

**(Z)-1-(4-chlorophenyl)-3,3,3-trifluoroprop-1-en-1-yl 3-methylbut-2-enoate (4w)** ( $^1\text{H}$  NMR 400 MHz,  $\text{CDCl}_3$ ;  $^{19}\text{F}$  NMR 376 MHz,  $\text{CDCl}_3$ ;  $^{13}\text{C}$  NMR 101 MHz,  $\text{CDCl}_3$ ).

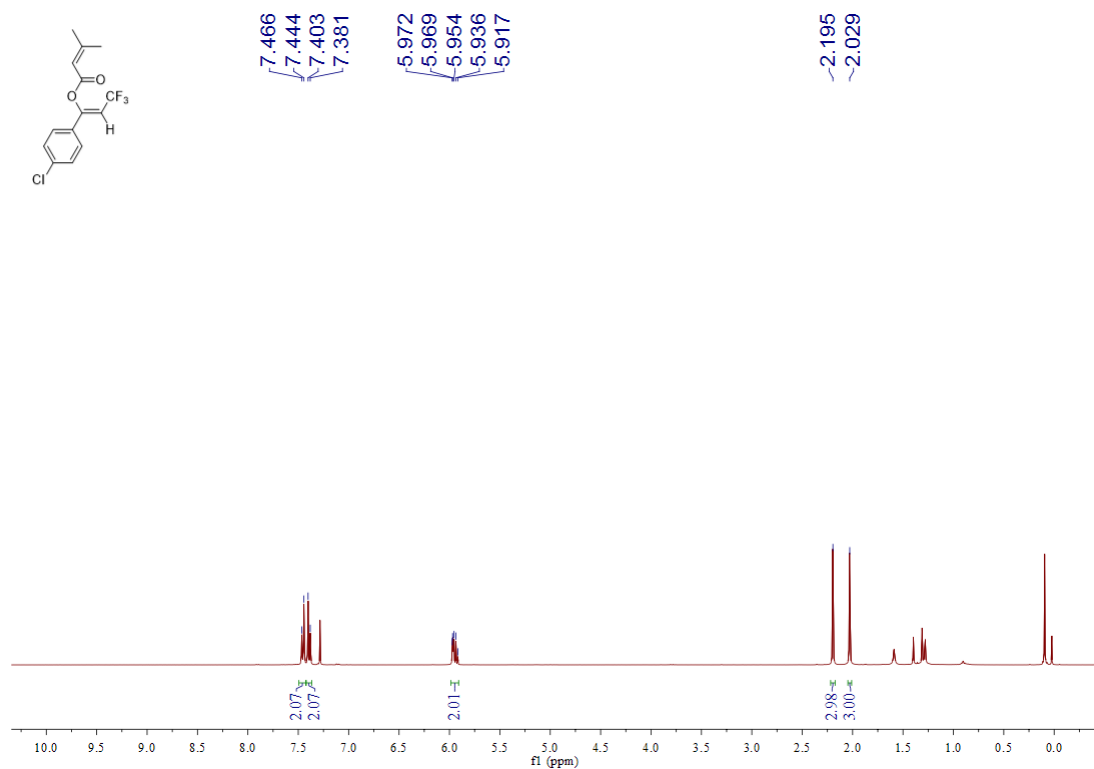

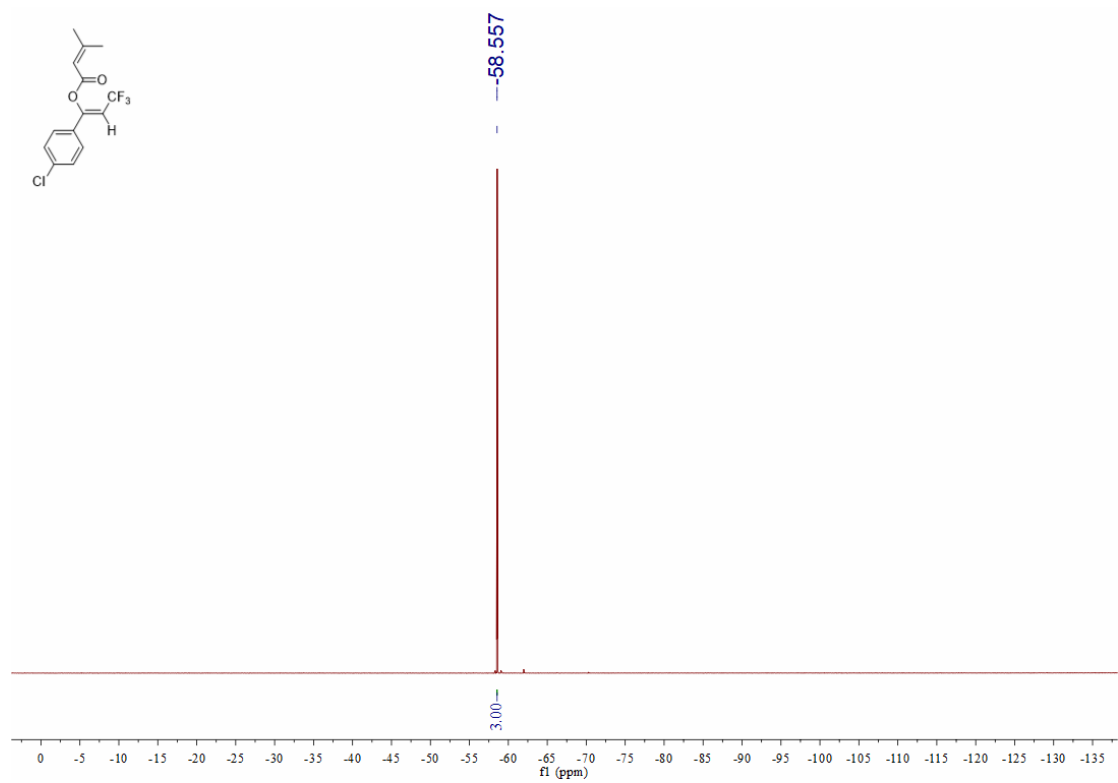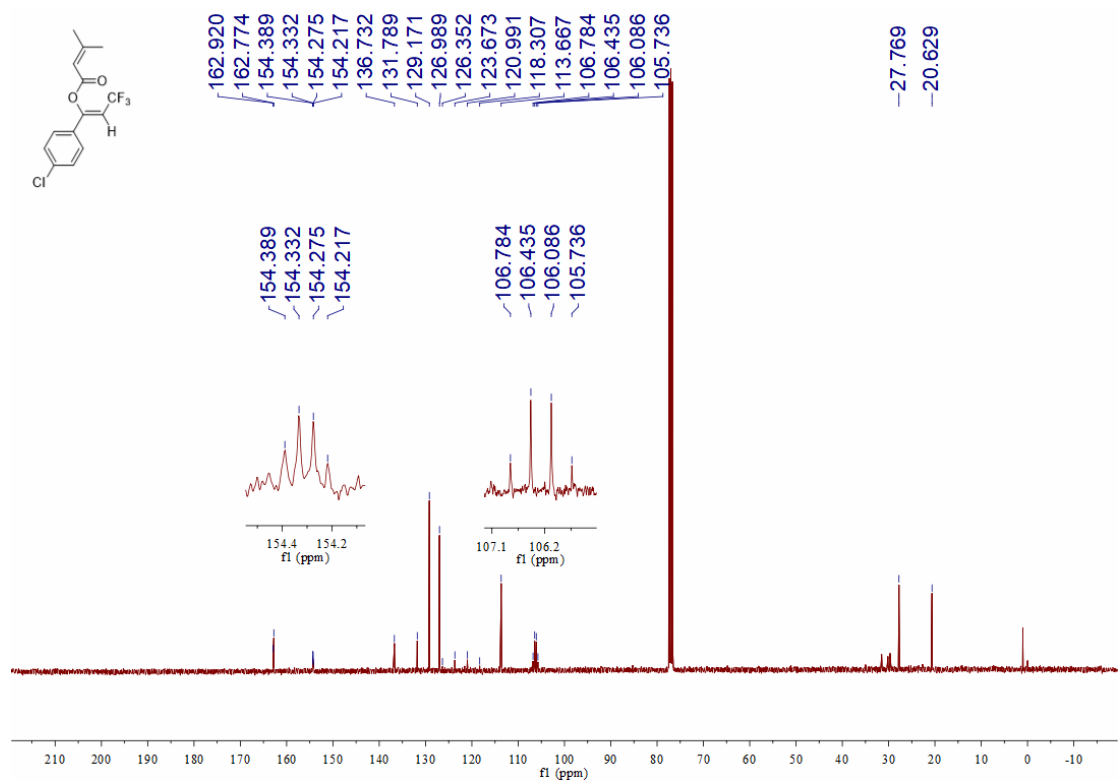

**(E)-1-(4-chlorophenyl)-3,3,3-trifluoroprop-1-en-1-yl 3-methylbut-2-enoate (4w')** ( $^1\text{H}$  NMR 400 MHz,  $\text{CDCl}_3$ ;  $^{19}\text{F}$  NMR 376 MHz,  $\text{CDCl}_3$ ;  $^{13}\text{C}$  NMR 101 MHz,  $\text{CDCl}_3$ ).

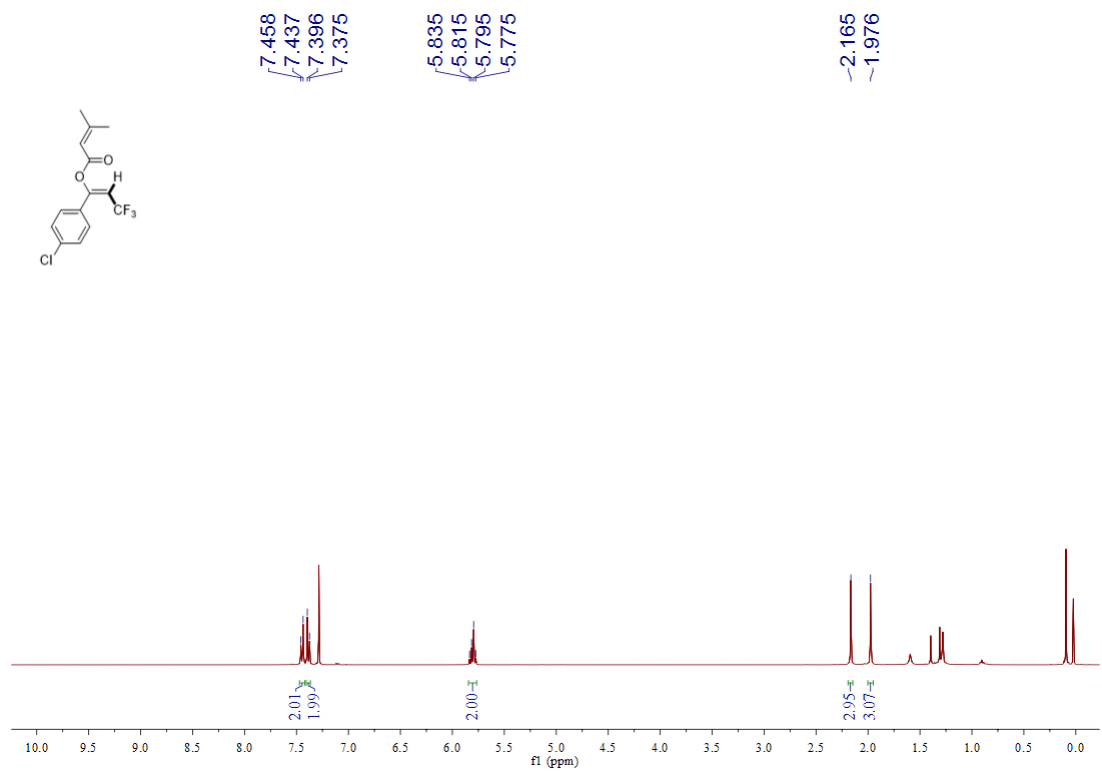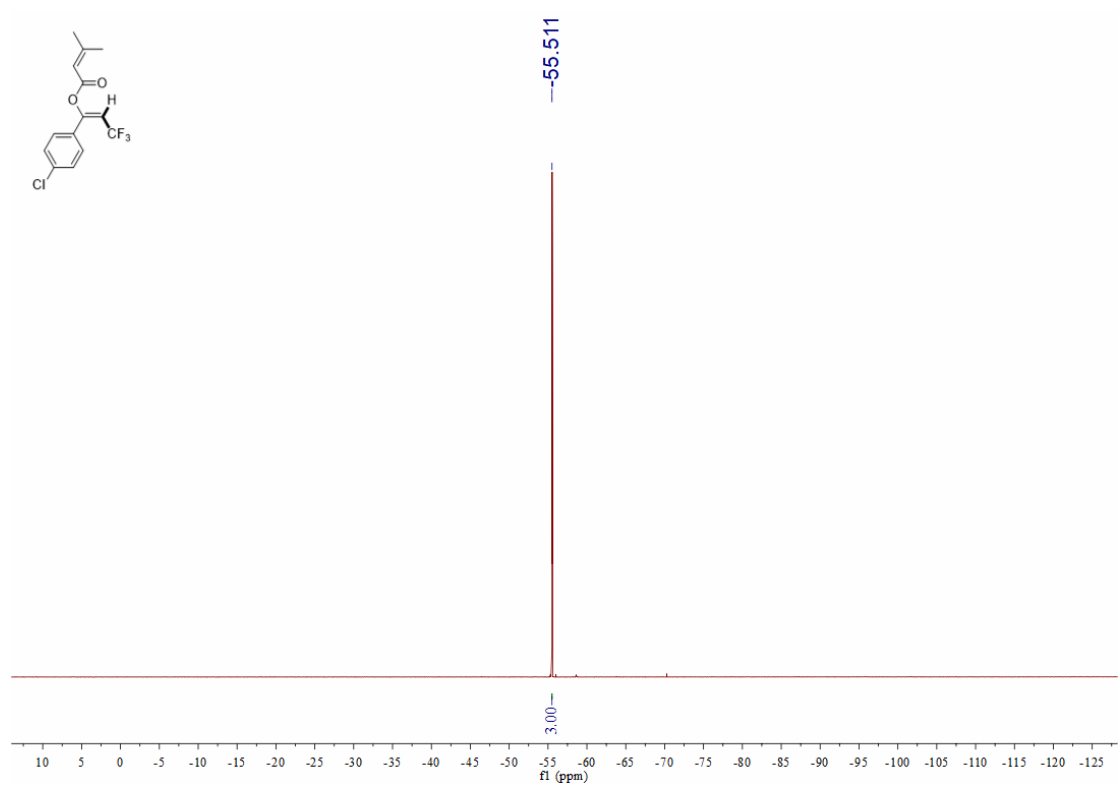

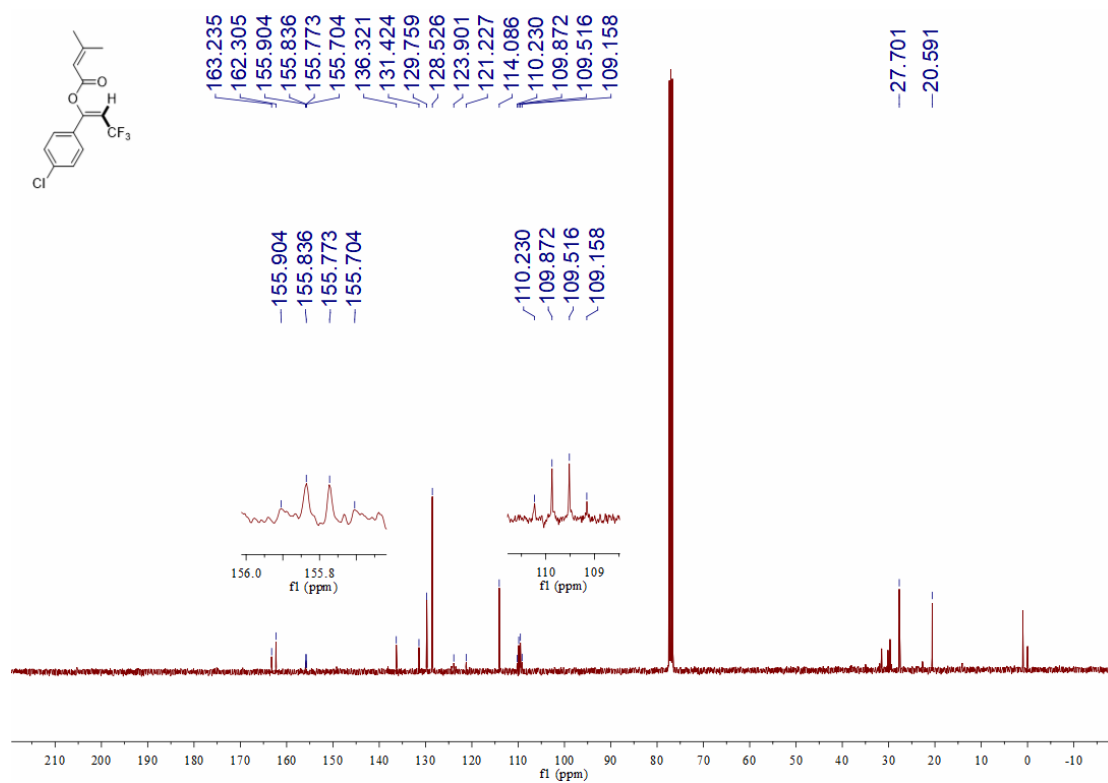

**(Z)-1-(4-chlorophenyl)-3,3,3-trifluoroprop-1-en-1-yl cinnamate (4x)** ( $^1\text{H}$  NMR 400 MHz,  $\text{CDCl}_3$ ;  $^{19}\text{F}$  NMR 376 MHz,  $\text{CDCl}_3$ ;  $^{13}\text{C}$  NMR 101 MHz,  $\text{CDCl}_3$ ).

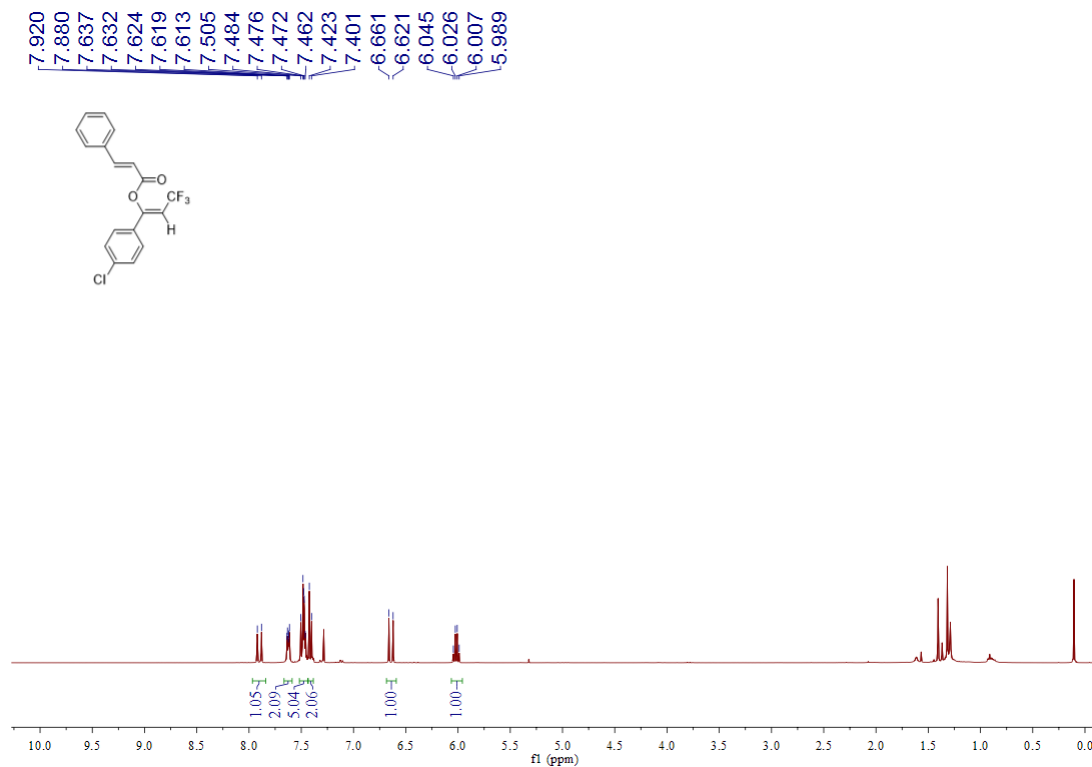



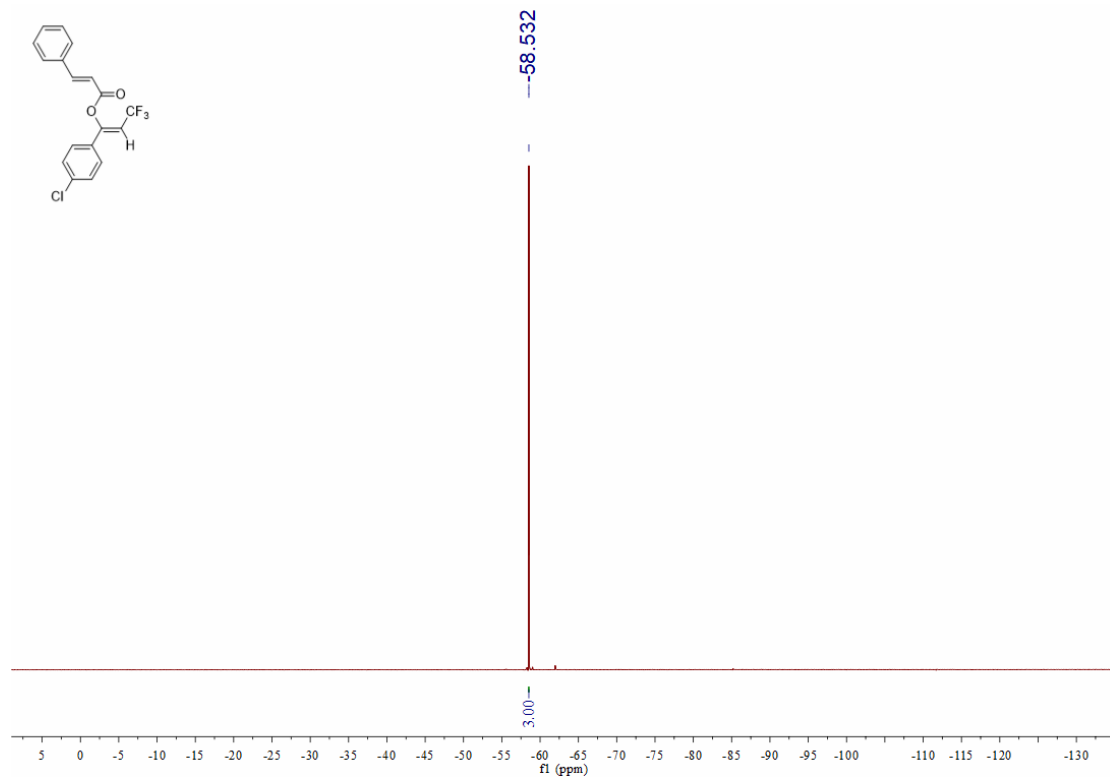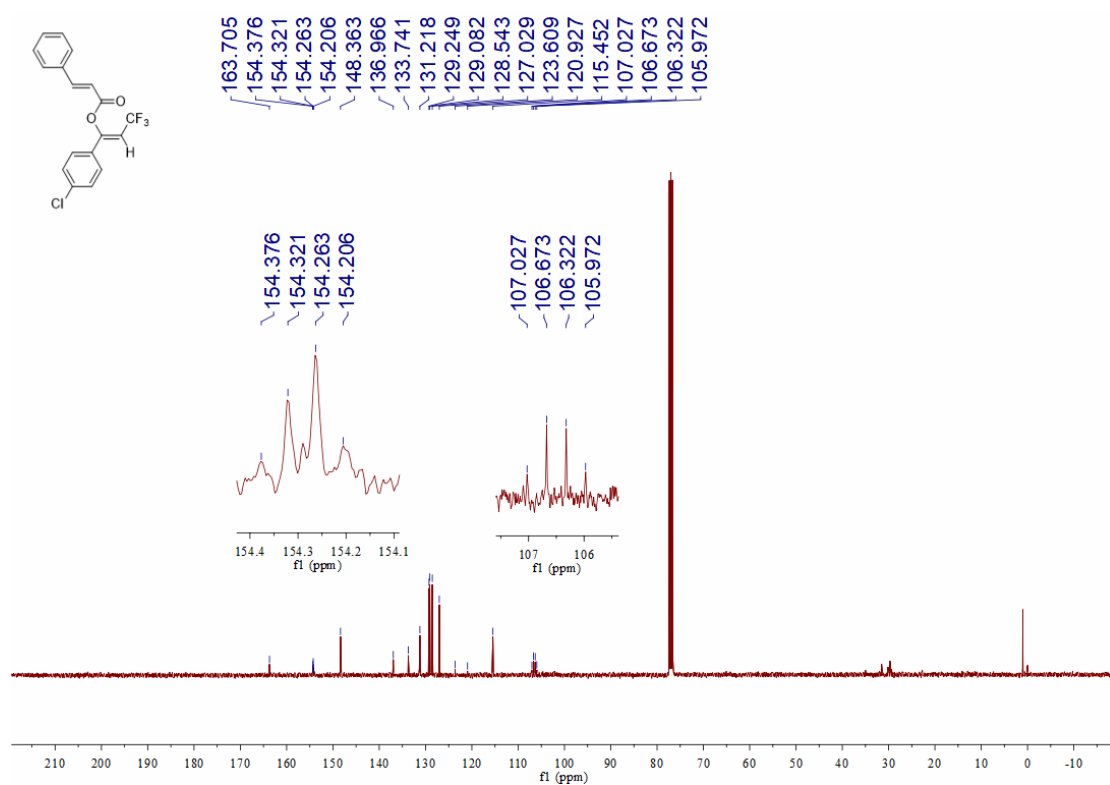

**(Z)-1-(4-chlorophenyl)-3,3,3-trifluoroprop-1-en-1-yl benzoate (4aa)** ( $^1\text{NMR}$  400 MHz,  $\text{CDCl}_3$ ;  $^{19}\text{F}$  NMR 376 MHz,  $\text{CDCl}_3$ ;  $^{13}\text{C}$  NMR 101 MHz,  $\text{CDCl}_3$ ).

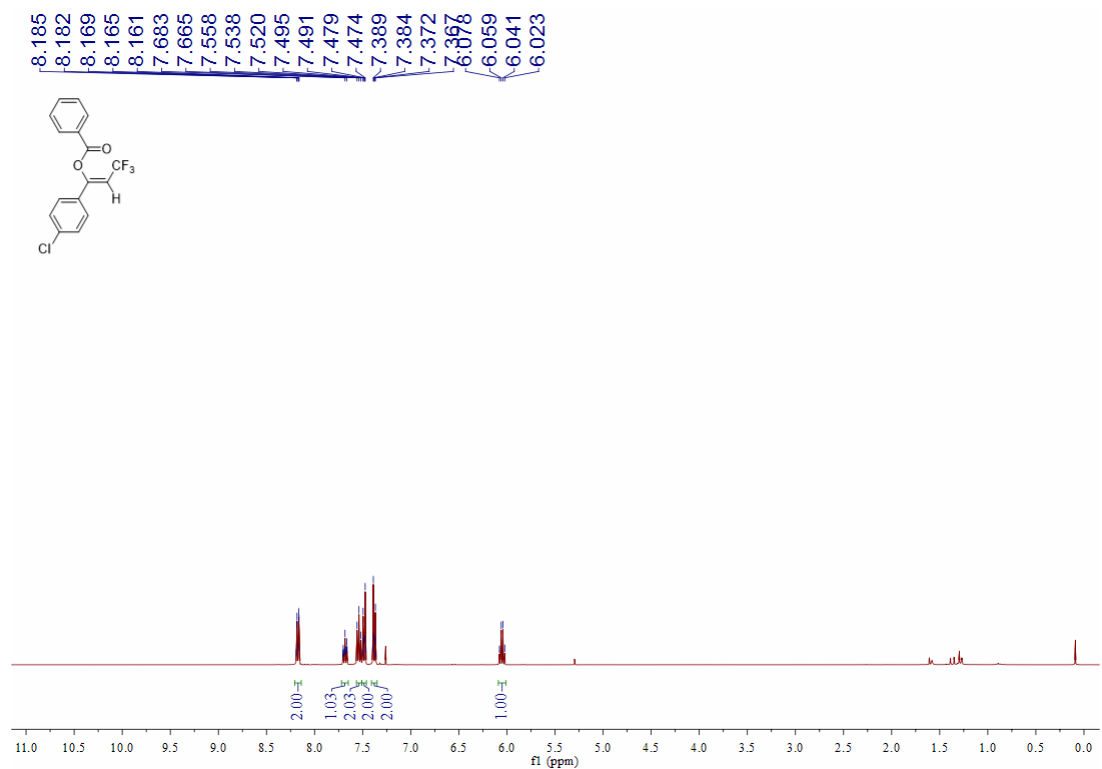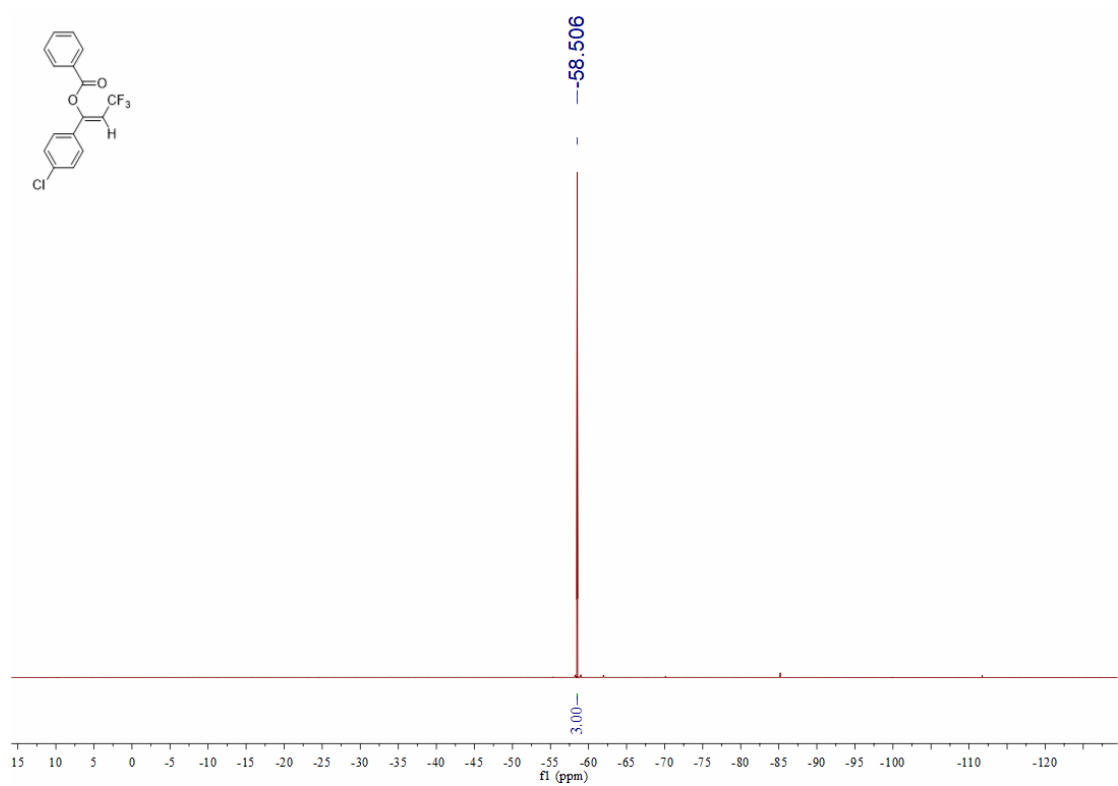

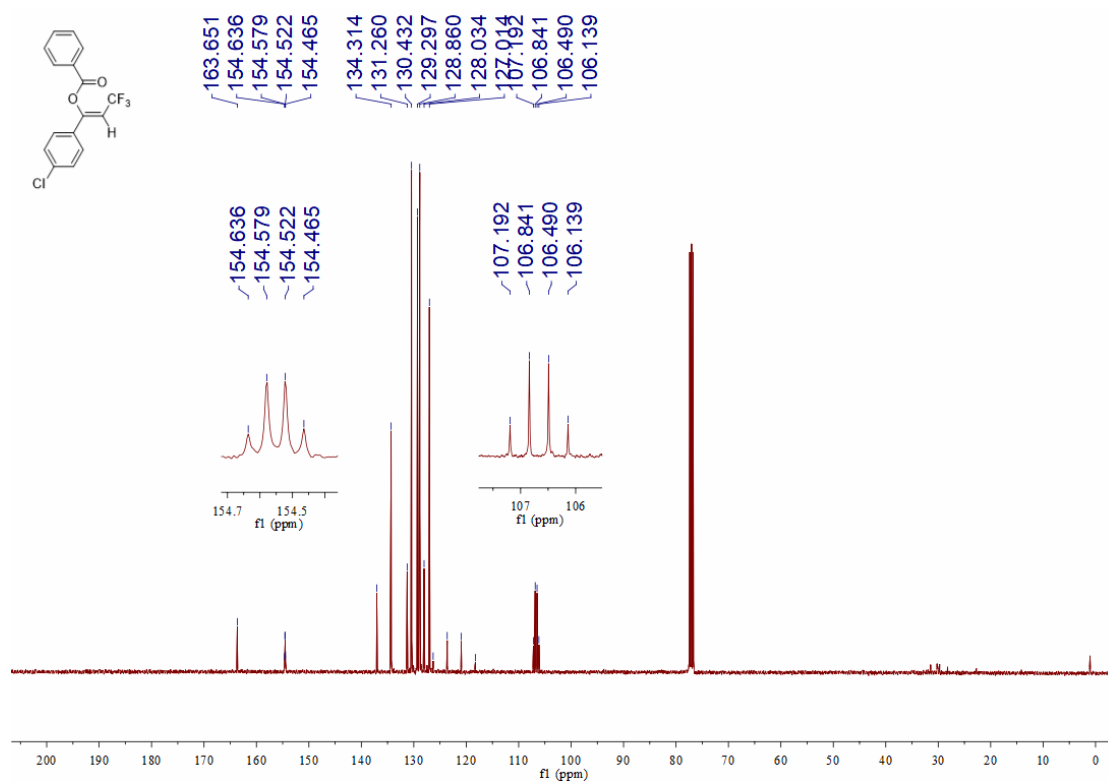

**(Z)-1-(4-chlorophenyl)-3,3,3-trifluoroprop-1-en-1-yl 4-methylbenzoate (4ae)** ( $^1\text{H}$  NMR 400 MHz,  $\text{CDCl}_3$ ;  $^{19}\text{F}$  NMR 376 MHz,  $\text{CDCl}_3$ ;  $^{13}\text{C}$  NMR 101 MHz,  $\text{CDCl}_3$ ).

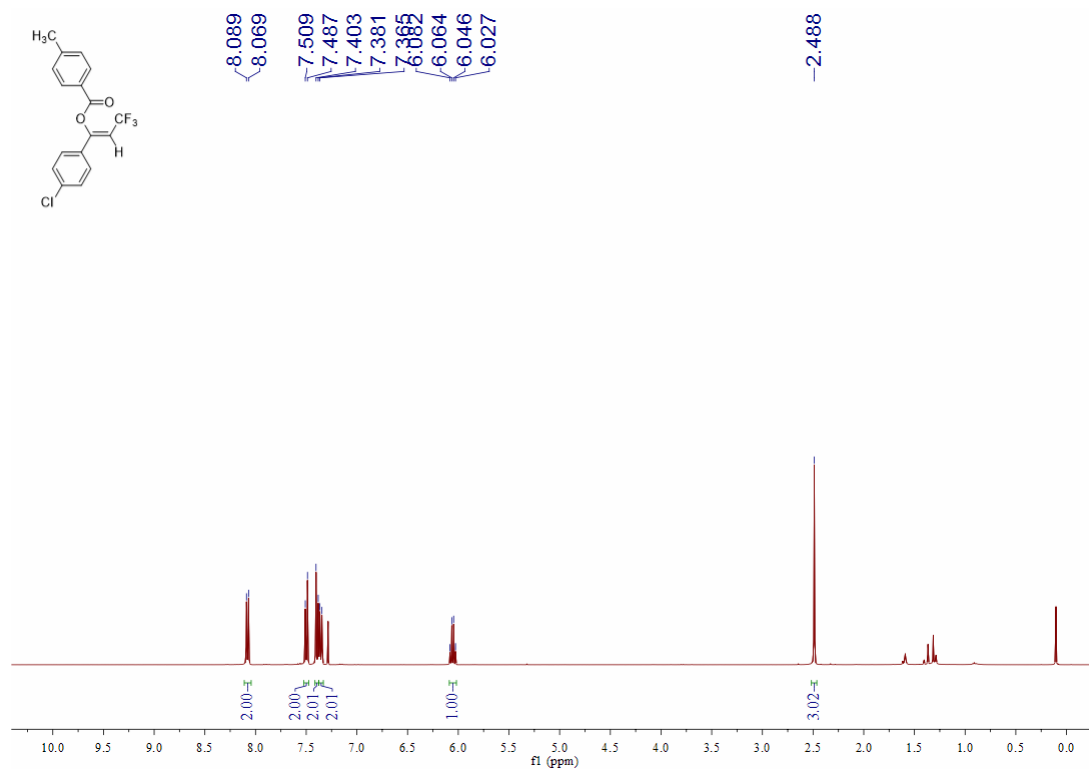

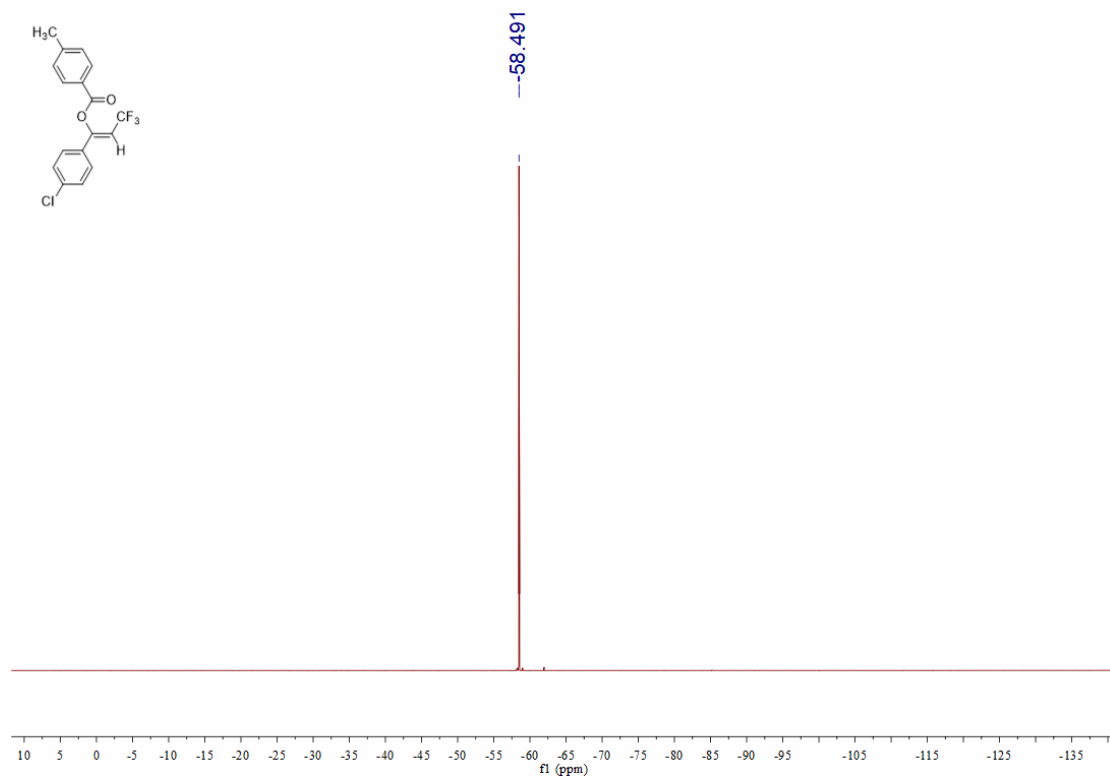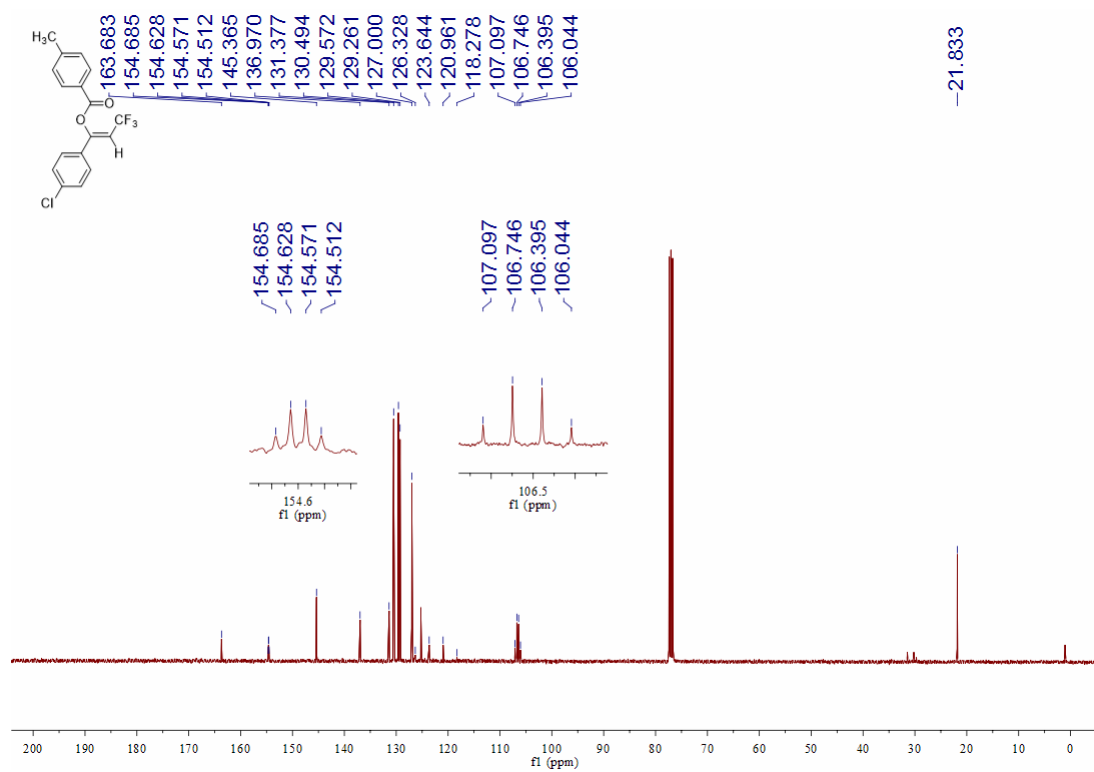

**(Z)-3,3,3-trifluoro-1-(3-fluorophenyl)prop-1-en-1-yl 4-methylbenzoate (4af)** ( $^1\text{NMR}$  400 MHz,  $\text{CDCl}_3$ ;  $^{19}\text{F}$  NMR 376 MHz,  $\text{CDCl}_3$ ;  $^{13}\text{C}$  NMR 101 MHz,  $\text{CDCl}_3$ ).

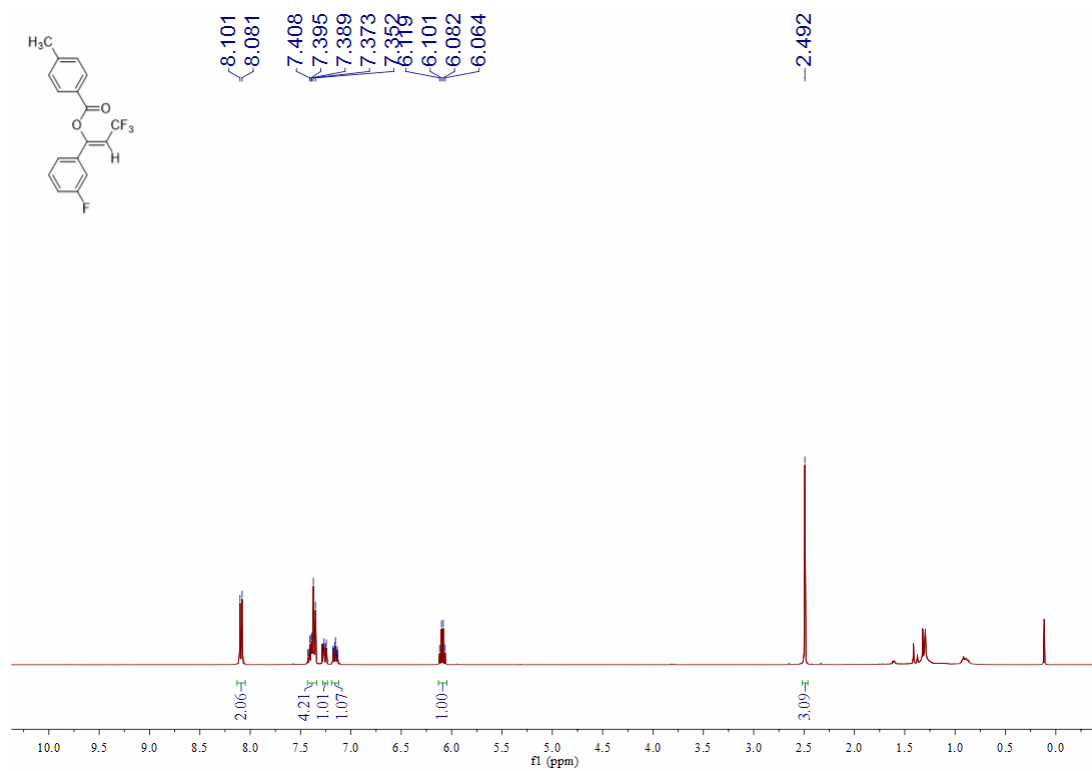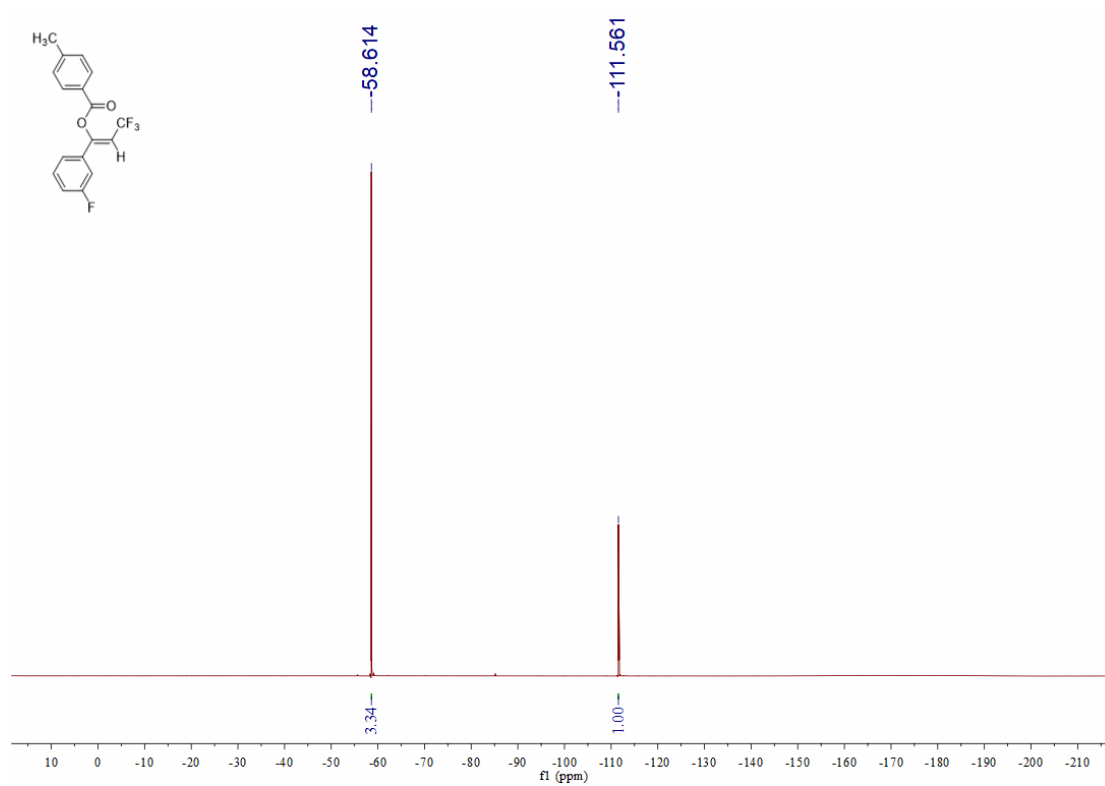

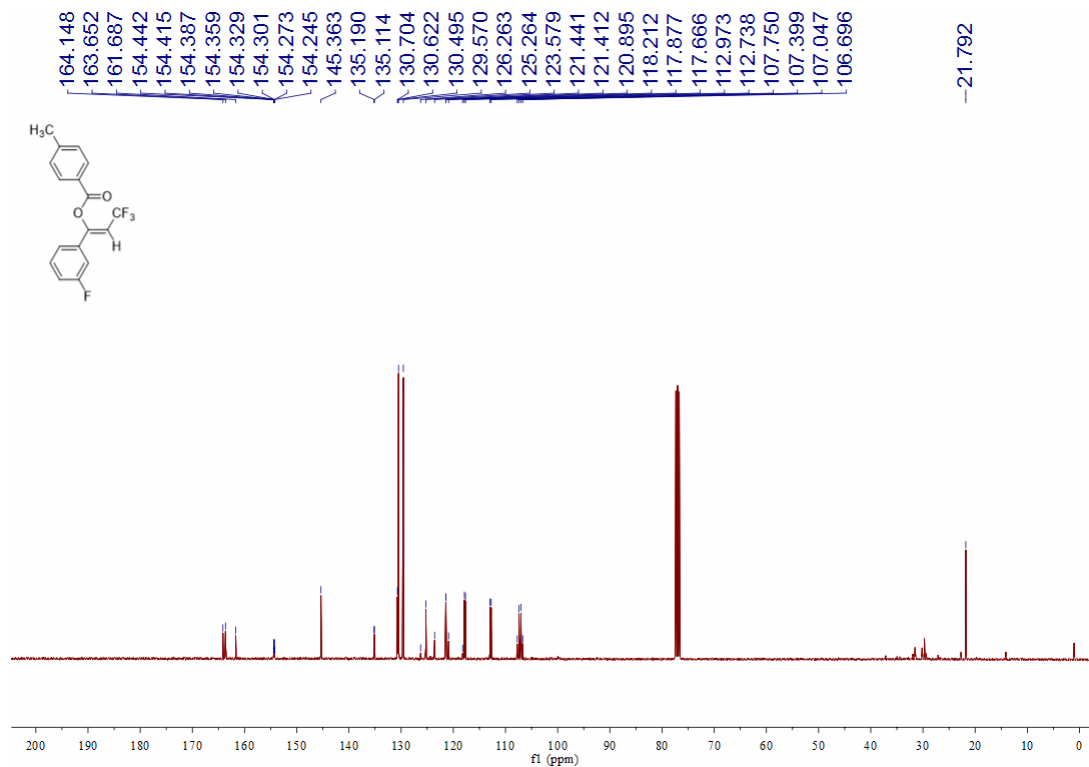

-21.792

**(Z)-1-(4-chlorophenyl)-3,3,3-trifluoroprop-1-en-1-yl quinoline-6-carboxylate (4ah)** (<sup>1</sup>H NMR 400 MHz, CDCl<sub>3</sub>; <sup>19</sup>F NMR 376 MHz, CDCl<sub>3</sub>; <sup>13</sup>C NMR 101 MHz, CDCl<sub>3</sub>).

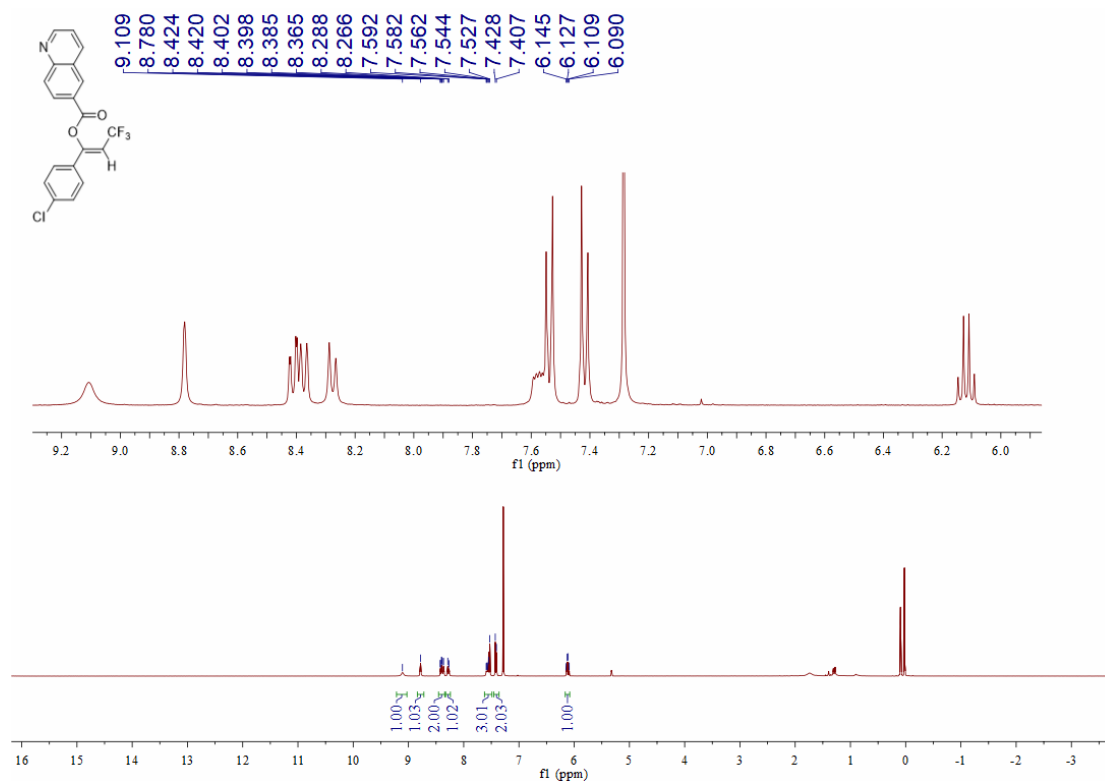

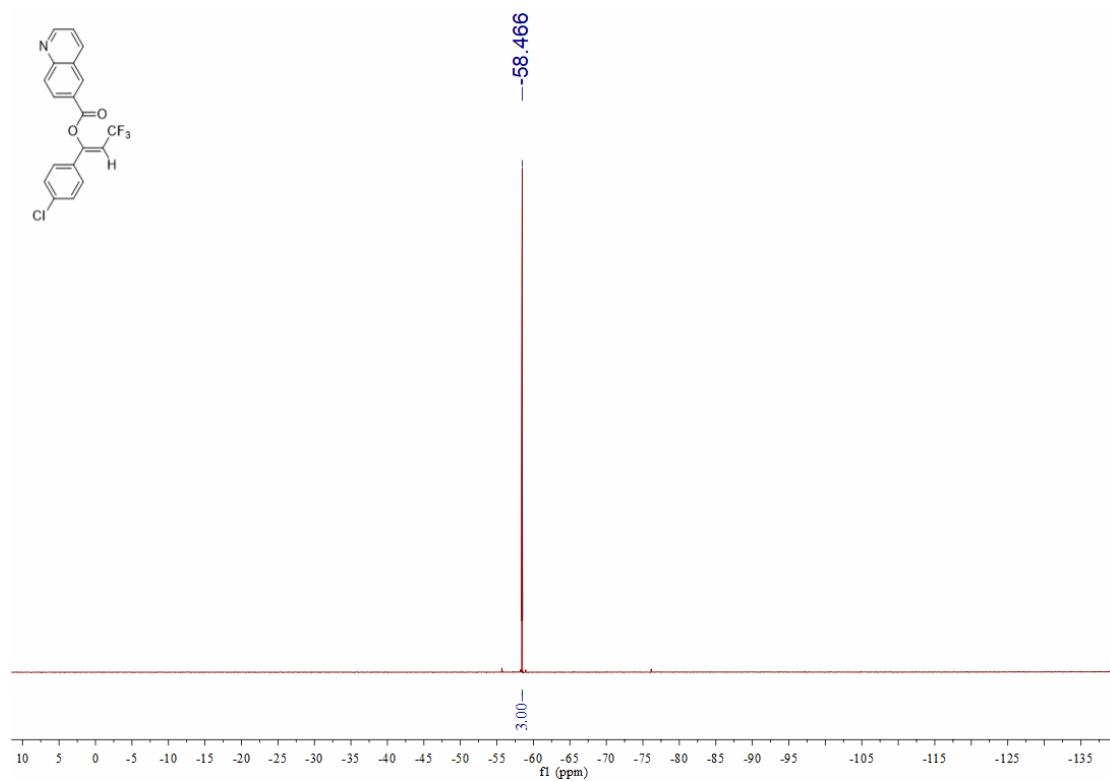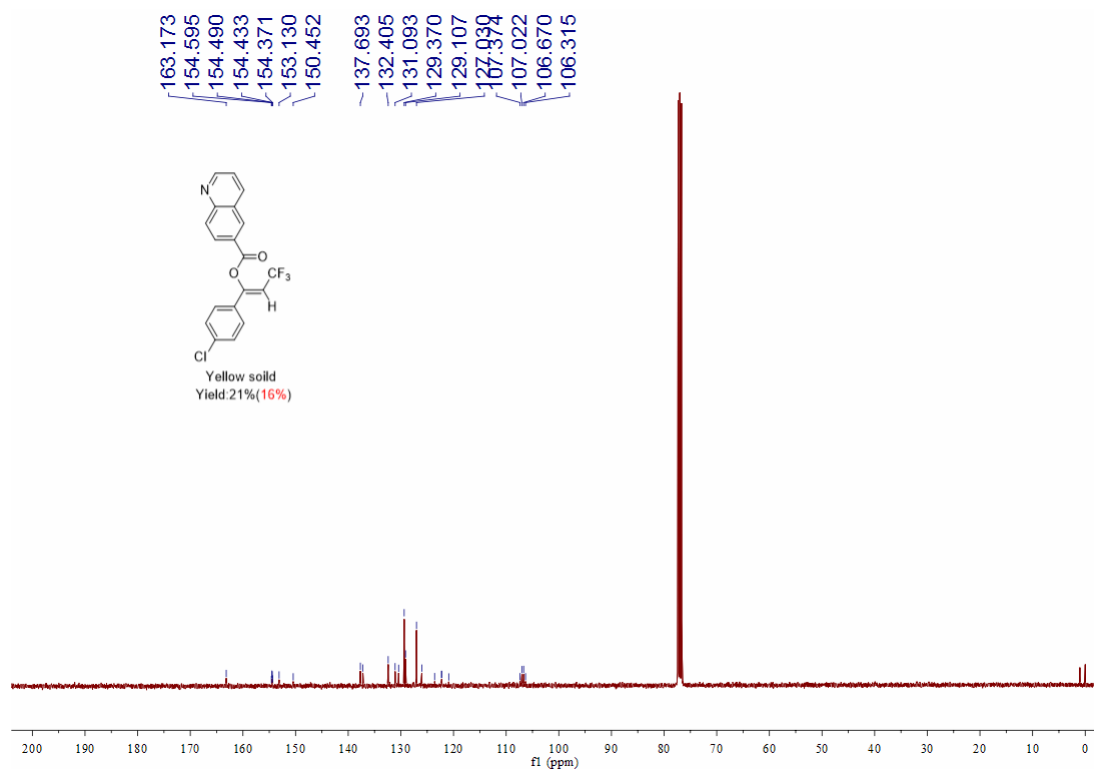

**(Z)-1-(4-chlorophenyl)-3,3,3-trifluoroprop-1-en-1-yl thiophene-3-carboxylate (4ai)** ( $^1\text{H}$  NMR 400 MHz,  $\text{CDCl}_3$ ;  $^{19}\text{F}$  NMR 376 MHz,  $\text{CDCl}_3$ ;  $^{13}\text{C}$  NMR 101 MHz,  $\text{CDCl}_3$ ).

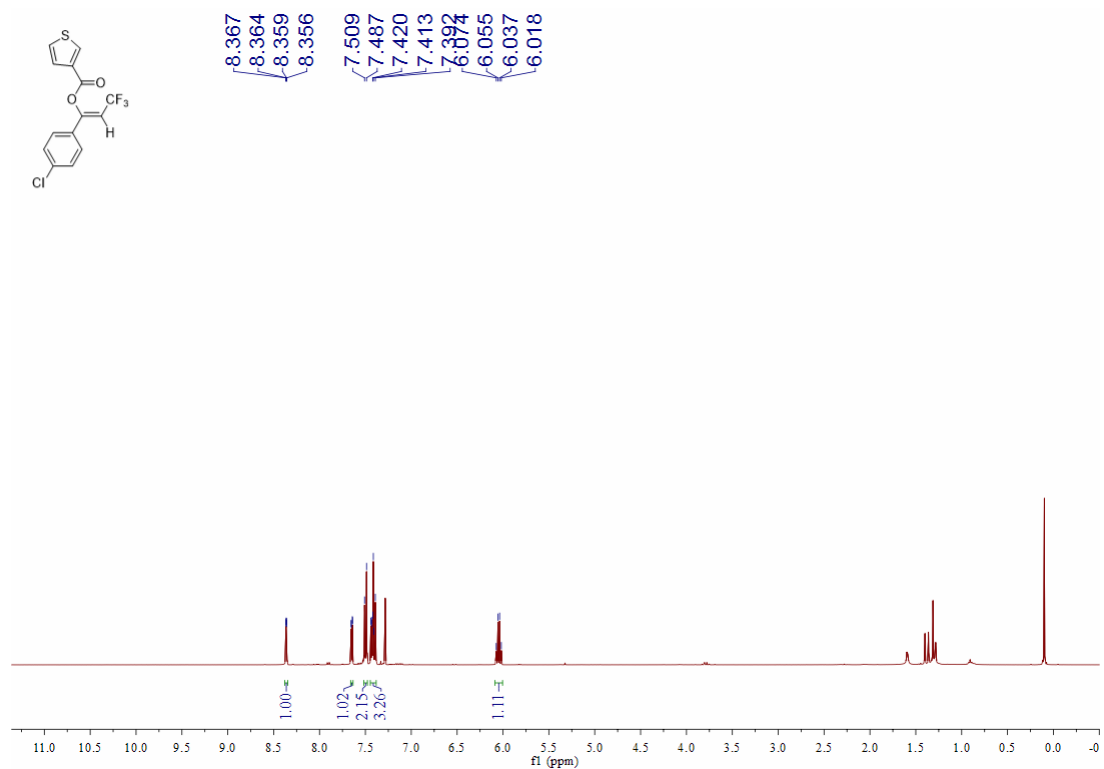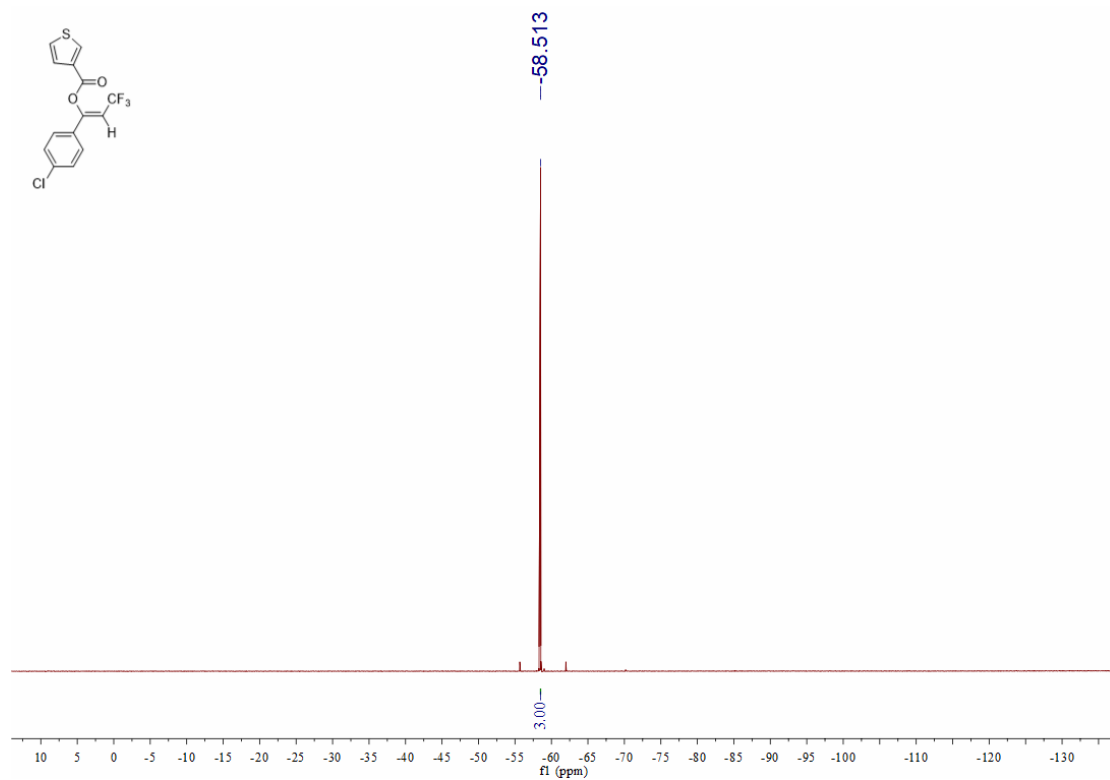



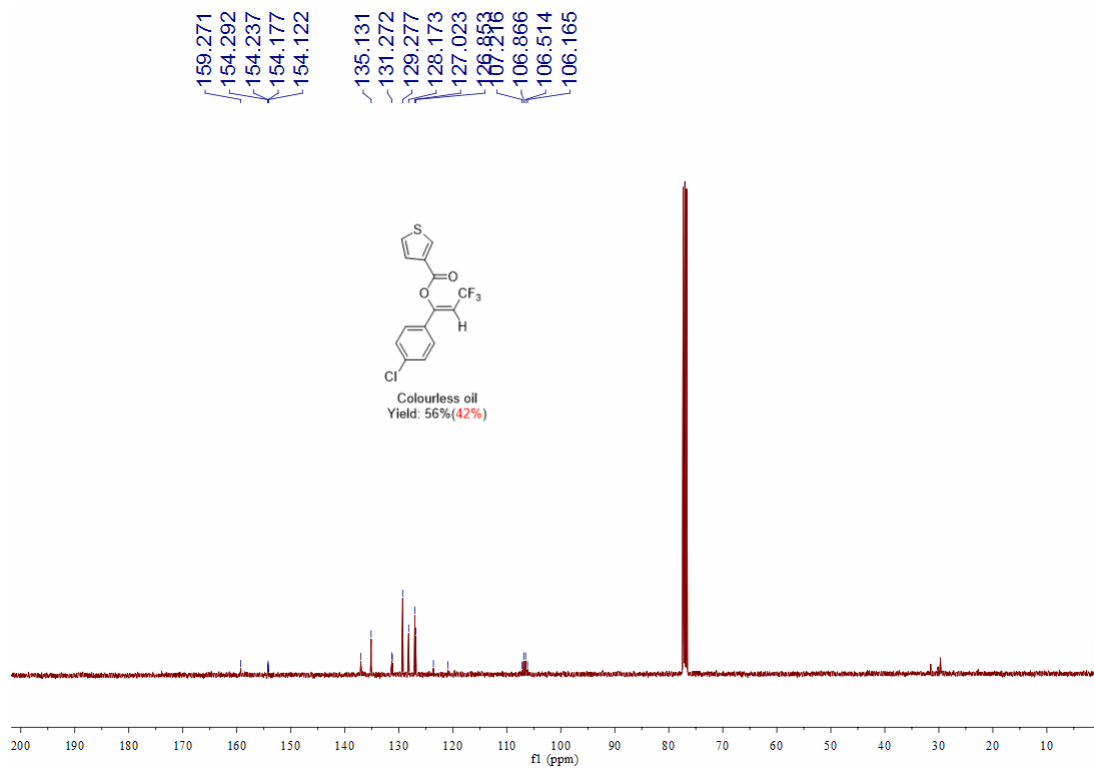

**(Z)-1-(4-chlorophenyl)-3,3,3-trifluoroprop-1-en-1-yl**

**(4R)-4-((8R,9S,10S,13R,14S,17R)-10,13-dimethyl-3,7,12-trioxohexadecahydro-1H-cyclopenta[a]phenanthren-17-yl)pentanoate** ( $^1\text{H}$  NMR 400 MHz,  $\text{CDCl}_3$ ;  $^{19}\text{F}$  NMR 376 MHz,  $\text{CDCl}_3$ ;  $^{13}\text{C}$  NMR 101 MHz,  $\text{CDCl}_3$  ).—contains very minor amount of *E*-isomer as indicated by  $^{19}\text{F}$  NMR in a ratio of ca 12:1 of *Z/E*.

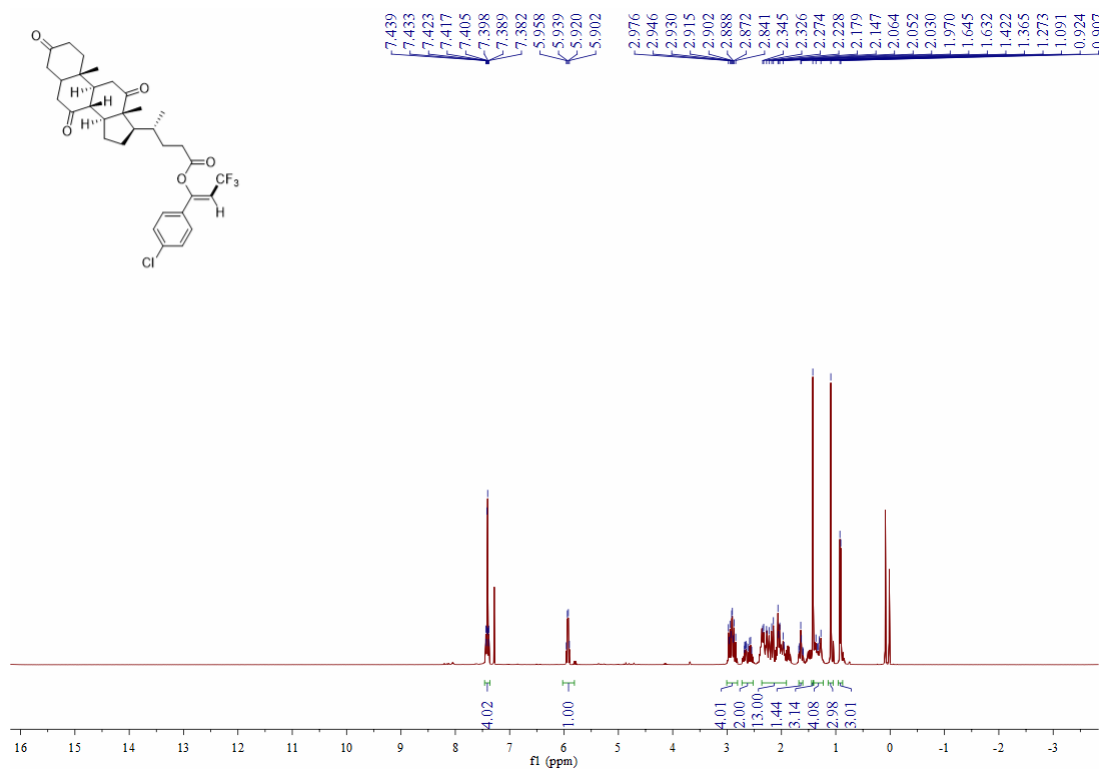

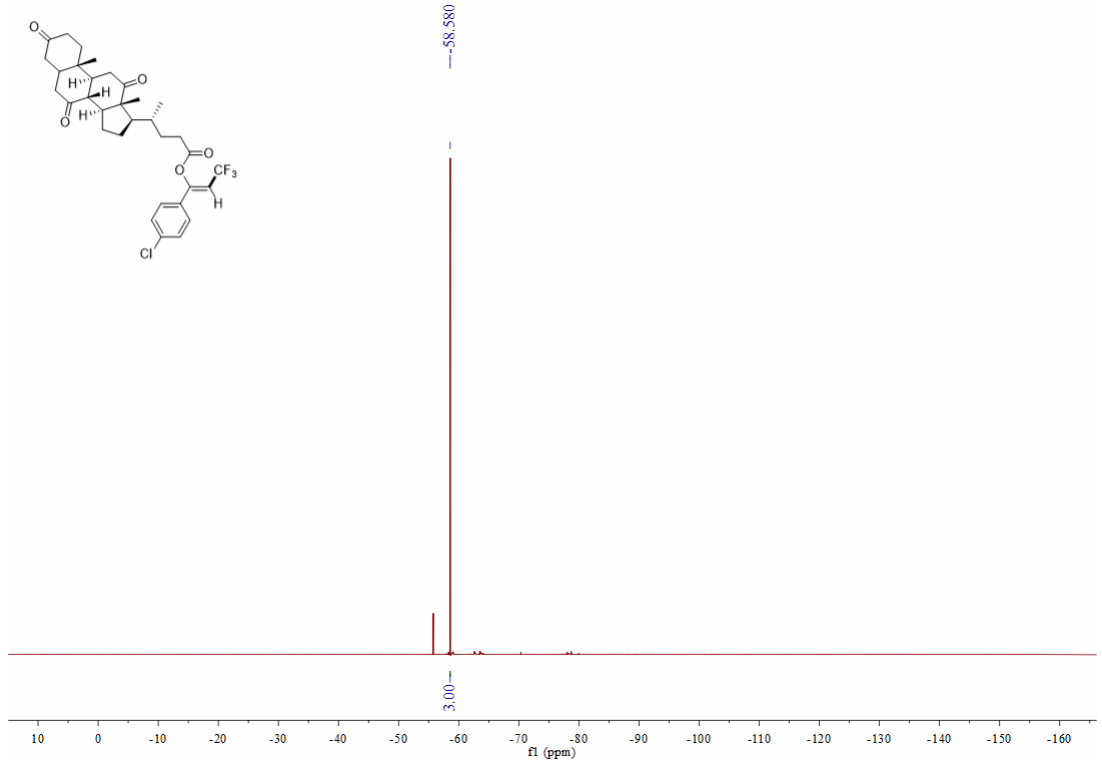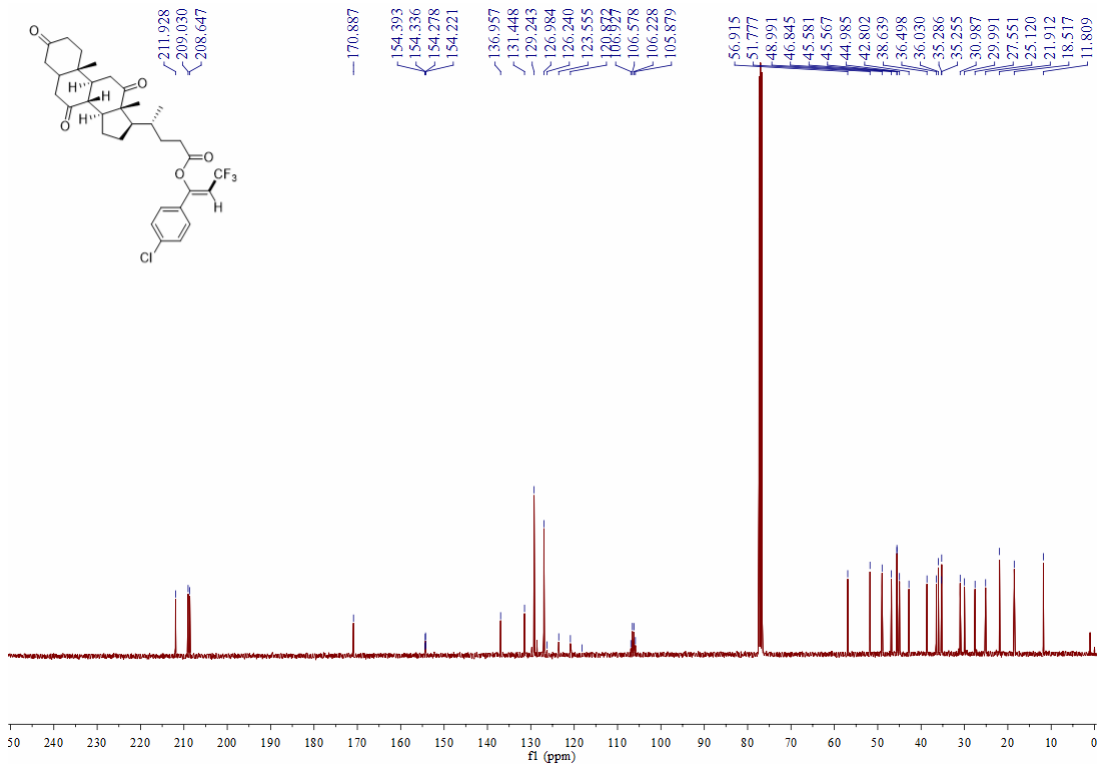

Supplement: c9cc01173k1.pdf [file c9cc01173k1.pdf]
